# Supplementary material for: Economic analysis of oral dexamethasone for symptom relief of sore throat: the UK TOAST study
Source: PubMed Central journal article supplement — BMJ Open. 2018 Apr 28;8(4):e019184. doi: 10.1136/bmjopen-2017-019184 (PMC5931286; doi:10.1136/bmjopen-2017-019184), 2018-04-28

# BMJ Open

BMJ Open is committed to open peer review. As part of this commitment we make the peer review history of every article we publish publicly available.

When an article is published we post the peer reviewers' comments and the authors' responses online. We also post the versions of the paper that were used during peer review. These are the versions that the peer review comments apply to.

The versions of the paper that follow are the versions that were submitted during the peer review process. They are not the versions of record or the final published versions. They should not be cited or distributed as the published version of this manuscript.

BMJ Open is an open access journal and the full, final, typeset and author-corrected version of record of the manuscript is available on our site with no access controls, subscription charges or pay-per-view fees (<http://bmjopen.bmj.com>).

If you have any questions on BMJ Open's open peer review process please email [info.bmjopen@bmj.com](mailto:info.bmjopen@bmj.com)

# BMJ Open

## An Economic Analysis of Oral Dexamethasone for Symptom Relief of Sore Throat: The UK TOAST Study

|                               |                                                                                                                                                                                                                                                                                                                                                                                                                                                                                                                                                                                                                                                                                                                                                                                                                                                                      |
|-------------------------------|----------------------------------------------------------------------------------------------------------------------------------------------------------------------------------------------------------------------------------------------------------------------------------------------------------------------------------------------------------------------------------------------------------------------------------------------------------------------------------------------------------------------------------------------------------------------------------------------------------------------------------------------------------------------------------------------------------------------------------------------------------------------------------------------------------------------------------------------------------------------|
| Journal:                      | <i>BMJ Open</i>                                                                                                                                                                                                                                                                                                                                                                                                                                                                                                                                                                                                                                                                                                                                                                                                                                                      |
| Manuscript ID                 | bmjopen-2017-019184                                                                                                                                                                                                                                                                                                                                                                                                                                                                                                                                                                                                                                                                                                                                                                                                                                                  |
| Article Type:                 | Research                                                                                                                                                                                                                                                                                                                                                                                                                                                                                                                                                                                                                                                                                                                                                                                                                                                             |
| Date Submitted by the Author: | 15-Aug-2017                                                                                                                                                                                                                                                                                                                                                                                                                                                                                                                                                                                                                                                                                                                                                                                                                                                          |
| Complete List of Authors:     | <p>Burns, Richeal; University of Oxford, Nuffield Department of Population Health<br/> Wolstenholme, Jane; University of Oxford, Nuffield Department of Population Health<br/> Jawad, Sena; Neonatal Data Analysis Unit, Department of Medicine, Imperial College London<br/> Williams, Nicola; Nuffield Department of Primary Care Health Sciences, University of Oxford<br/> Thompson, Matthew; University of Washington, Department of Family Medicine<br/> Perera, Rafael; University of Oxford, Primary Health Care<br/> Hay, Alastair; University of Bristol, School of Social and Community Medicine<br/> Heneghan, Carl; Oxford University, Primary Health Care<br/> Little, Paul; University of Southampton, Medical School,<br/> Moore, Michael; Three Swans Surgery<br/> Hayward, Gail; Oxford University, Department of Primary Care Health Sciences</p> |
| Keywords:                     | PRIMARY CARE, SORE THROAT, COST-UTILITY ANALYSIS                                                                                                                                                                                                                                                                                                                                                                                                                                                                                                                                                                                                                                                                                                                                                                                                                     |

SCHOLARONE™  
Manuscripts

1  
2  
3 **1 Title: An Economic Analysis of Oral Dexamethasone for Symptom Relief of**  
4 **2 Sore Throat: The UK TOAST Study**  
5

6  
7 3 Authors: Richéal M Burns\* PhD, Jane Wolstenholme\* PhD, Sena Jawad MSc, Nicola  
8 4 Williams MSc, Matthew Thompson PhD, Rafael Perera DPHIL, Alastair D Hay  
9 5 FRCGP, Carl Heneghan DPHIL, Paul Little FMedSci, Michael Moore FRCGP, Gail  
10 6 Hayward DPHIL, on behalf of the TOAST Trial Investigators  
11  
12  
13

14 7 Health Economics Research Centre, Nuffield Department of Population Health, University of  
15 8 Oxford. Richéal M Burns and Jane Wolstenholme researcher in health economics, Nuffield  
16 9 Department of Population Health, University of Oxford. Sena Jawad trial statistician,  
17 10 Neonatal Data Analysis Unit, Department of Medicine, Imperial College London. Nicola  
18 11 Williams senior trial statistician, Nuffield Department of Primary Care Health Sciences,  
19 12 University of Oxford. Matthew Thompson professor of family medicine, Department of  
20 13 Family Medicine, University of Washington. Rafael Perera director of medical statistics,  
21 14 Nuffield Department of Primary Care Health Sciences, University of Oxford. Alastair Hay  
22 15 professor of primary care, Centre for Academic Primary Care, NIHR School for Primary Care  
23 16 Research, School of Social and Community Medicine, University of Bristol. Carl Heneghan  
24 17 professor of primary care, Nuffield Department of Primary Care Health Sciences, University  
25 18 of Oxford. Paul Little professor of primary care, Primary Care and Population Science, NIHR  
26 19 School for Primary Care Research, Faculty of Medicine, University of Southampton. Michael  
27 20 Moore professor of primary care, Primary Care and Population Science, NIHR School for  
28 21 Primary Care Research, Faculty of Medicine, University of Southampton. Gail Hayward  
29 22 academic clinical lecturer, Nuffield Department of Primary Care Health Sciences, University  
30 23 of Oxford.  
31  
32  
33  
34  
35  
36  
37  
38

39 25 Corresponding Author:

40 26 Dr. Richéal M. Burns

41 27 Health Economic Research Centre,

42 28 Nuffield Department of Population Health, University of Oxford

43 29 Tel: +44 (0) 1865 289277

44 30 Email: Richeal.Burns@dph.ox.ac.uk  
45  
46  
47  
48  
49  
50  
51  
52  
53  
54  
55  
56  
57  
58  
59  
60

## Abstract

**Objectives:** To undertake an economic analysis assessing the cost-effectiveness of a single dose of oral dexamethasone compared to placebo for the relief of sore throat.

**Design:** A UK-based, multicentre, two arm, individually randomised, double blind trial

**Setting and Population:** Adults ( $\geq 18$  years) with acute sore throat and painful swallowing judged to be infective in origin, recruited and randomised in primary care.

**Intervention:** A single dose of 10mg oral dexamethasone compared to placebo given at primary care visit.

**Main Outcome:** Incremental cost-effectiveness ratios (ICERs), cost per quality-adjusted symptom resolution using the EQ-5D-5L instrument, were estimated as part of a cost-utility analysis performed on an intention-to-treat cohort adopting a health payers perspective.

**Results:** Differences in health-related quality of life (HRQoL) over 7 days from baseline and at 24 hours in the dexamethasone compared with the placebo group (2.9% and 2.5% higher, respectively) were observed. After controlling for the baseline HRQoL imbalances, the impact of the intervention was negative but not statistically significant: the QALY difference was -0.00005 (95% CI: -0.0002; 0.00011) equivalent to a loss in HRQoL of a half hour in the dexamethasone group.

The average cost per patient associated in the dexamethasone and placebo groups in the basecase analysis was £73 and £69, respectively. In the basecase probabilistic analysis, the mean ICER was -£6,440 (95% CI: -£132,151; £126,335) and the median ICER was -£304 (IQR: -£5,816; £3,877); suggesting considerable uncertainty.

1  
2  
3  
4  
5  
6  
7  
8  
9  
10  
11  
12  
13  
14  
15  
16  
17  
18  
19  
20  
21  
22  
23  
24  
25  
26  
27  
28  
29  
30  
31  
32  
33  
34  
35  
36  
37  
38  
39  
40  
41  
42  
43  
44  
45  
46  
47  
48  
49  
50  
51  
52  
53  
54  
55  
56  
57  
58  
59  
60

1 Conclusions and relevance: The economic burden associated with sore throat is  
2 substantial and was estimated at £2.35bn to the healthcare services payer based on  
3 reported resource use and 2015 UK unit costs. There is considerable uncertainty  
4 regarding the cost-effectiveness of a single dose of oral dexamethasone as a  
5 treatment strategy and therefore insufficient evidence to support its use in clinical  
6 practice.

7 Trial Registration: ISRCTN17435450 <http://www.isrctn.com/ISRCTN17435450>

8  
9 Key words: cost-utility analysis, primary care interventions, sore throat

## Strengths and limitations of this study

1. The analysis undertaken provides the first detailed account of the cost of sore throat in the UK.
2. The study collected a wide range of demographic, clinical, quality of life and resource use data using a trial-specific daily patient diary which permitted an extensive exploration of uncertainty in scenario and sub-group analyses.
3. Both health services payer and societal perspectives were assessed in the economic evaluation.
4. In contrast to previous research highlighting no clinical differences across delayed prescription and no treatment strategies, this analysis suggests that clinical and non-clinical benefits of the delayed prescription in addition to the dexamethasone need to be explored further.
5. Reported resource use for HSP analysis was cross-checked with a follow-up patient survey and medical record review and as such where no resource use was identified for each patient across the data sources, the assumption of zero resource use for that category is justifiable but potentially leading to some bias in cost estimates.

## 1 Introduction

2

3 An estimated £400 million annually is spent on consultations and lost productivity

4 associated with sore throat alone in the UK.<sup>1,2</sup> Almost one in ten registered UK

5 patients will see their general practitioner (GP) every year with sore throat.<sup>3</sup> 91% of

6 those diagnosed with tonsillitis will receive antibiotics, as will half of those recorded

7 as 'sore throat' or 'pharyngitis'.<sup>4</sup> NICE and International guidance recognises the

8 limited evidence for benefit of antibiotics in its advice to avoid prescriptions in the

9 majority of patients<sup>5-6</sup>; however, prescribing rates remain disproportionately high

10 even though patients attend mainly due to anxiety over symptoms.<sup>7</sup> A key driver for

11 patients to attend with a sore throat is the severity of their symptoms, so affective

12 symptomatic treatment may help reduce patient reliance on antibiotic. Furthermore

13 where antibiotics are used for streptococcal infections more rapid clinical

14 improvement is also plausible with steroids<sup>8</sup> which could facilitate shorter courses of

15 antibiotics, which would improve both prescribing and the overall economic burden of

16 sore throat. Further, negative externalities associated with over-prescribing

17 antibiotics, predominantly the increasing issue of antimicrobial resistance<sup>9</sup>, could

18 also be moderated. The Treatment Options without Antibiotics for Sore Throat

19 (TOAST) trial<sup>10</sup> addressed whether or not oral corticosteroids provide clinical and

20 cost-effective benefits through symptom relief of sore throat. The cost-effectiveness

21 analysis alongside the TOAST trial assessed the costs and benefits of a single dose

22 of 10mg oral dexamethasone compared to placebo for the symptom relief of sore

23 throat.

24

## 1 **Methods**

### 3 *Intervention*

4 TOAST was a multicentre, two arm, individually randomised, double blind trial  
5 comparing a single dose of 10mg oral dexamethasone with identical placebo in  
6 adults aged between 18 and 70 years<sup>1</sup> inclusive, presenting to primary care with  
7 acute sore throat. Recruitment took place in 42 primary care clinics in England from  
8 April 2013 to February 2015. The intervention period assessed was 7 days post-  
9 presentation and participants were followed up for 28 days to assess resource use  
10 and adverse events. A sub-group of patients in each trial arm received a delayed  
11 prescription for antibiotics at the discretion of the GP and randomisation was  
12 stratified by this decision. Further details on trial design, inclusion/ exclusion criteria  
13 and trial ethical approval are published elsewhere.<sup>6</sup>

### 15 *Outcome Measure*

16 The cost-effectiveness analysis assessed quality-adjusted symptom resolution over  
17 the 7 day trial duration and estimated median time to complete resolution of  
18 symptoms and the corresponding utility gains measured by the EuroQol EQ-5D 5  
19 level (EQ-5D-5L) index. These outcomes informed the construction of a quality-  
20 adjusted life year (QALY) used in the cost-utility analysis. The EuroQol instrument  
21 has five domains (mobility, self-care, activities, pain/discomfort, and  
22 anxiety/depression) and five response levels ranging from no problems to severe

---

<sup>1</sup> The trial initially recruited patients with no upper age limit and this was amended to age 70 after a suspected adverse reaction. Patients over the age of 70 recruited previous to the protocol amendment were included in the ITT analysis.



1  
2  
3 1 problem.<sup>11</sup> This health-related quality of life (HRQoL) instrument was administered to  
4  
5 2 all participants at baseline and completed on each day of the seven day patient  
6  
7 3 diary. Each of the five dimensions in the EQ-5D-5L version is scored from 1 (no  
8  
9 4 problem) to 5 (extreme problems), generating a profile (e.g. 11245) that can be used  
10  
11 5 to calculate a single index score (range -0.281 – 1.000).<sup>12</sup> The differences in EQ-5D-  
12  
13 6 5L from baseline (day 0) at each day i.e. days 1 to 7, were estimated and results  
14  
15 7 from the complete case analysis (CCA) (n=337) and the intention-to-treat analysis  
16  
17 8 (ITT) (n=565) are presented in the **Online Appendix** (Tables A4-A5). The EQ-5D  
18  
19 9 instrument also generates a self-rating of HRQoL scored from 0 to 100 employing a  
20  
21 10 visual analogue scale (VAS); this was used in scenario analyses. Quality adjusted  
22  
23 11 symptom resolution at 24 and 48 hours were also reported.  
24  
25  
26  
27  
28  
29

### 30 *Resource Use*

31  
32  
33 14 Primary care resource utilisation was recorded in a trial patient diary for the first 7  
34  
35 15 days of the trial and was complemented by a follow-up survey sent to those with  
36  
37 16 incomplete patient diaries. A primary care patient medical record review for the  
38  
39 17 period from day 1 to day 28 (trial follow-up period) was also undertaken which  
40  
41 18 recorded primary and secondary care contacts related to sore throat including  
42  
43 19 serious adverse events (SAEs) related to the condition. Resource use included the  
44  
45 20 following: visits and telephone calls to the GP; visits and telephone calls to nurses;  
46  
47 21 out-of-hours calls and visits; pharmacy visits; calls to helpline '111'; A&E visits;  
48  
49 22 hospitalisations; and various types of reported medication including prescribed  
50  
51 23 antimicrobials and over-the-counter (OTC) medications.  
52  
53  
54  
55  
56  
57  
58  
59  
60

## 1 *Unit Costs*

2 Total and average costs were estimated for the intervention, antibiotic usage (up to  
3 and including day 7), OTC medication usage (for days 0-7), health resource  
4 use/medication across the trial period (for days 1-28), SAEs, and patient productivity  
5 losses associated with sick days reported (for work and education) and inability to  
6 carry out usual activities. Unit costs, presented in the **Online Appendix** (Table A1),  
7 were obtained from a number of sources including, PSSRU<sup>13</sup>, British National  
8 Formulary<sup>14</sup>, Boots Chemist<sup>15</sup>, and the NHS Electronic Tariff Database<sup>16</sup> and are  
9 reported in UK currency. Productivity losses were costed using average wage rates  
10 for those employed and minimum wage rates for students.<sup>17</sup> All cost estimates were  
11 reported in 2015 GBP using appropriate adjustments for prices retrieved where  
12 necessary.<sup>18</sup> Disaggregated average cost estimates reported were based on the full  
13 cohort in the ITT analysis assuming non-responders had zero costs.

## 15 *Analysis*

16 Patient characteristics and reported resource use were summarised by trial arm. The  
17 primary economic analysis was conducted on an ITT basis and adopted the  
18 healthcare services payer perspective (HSP) which included the cost burden to the  
19 HSP only. Given the short-term duration of the trial, neither costs nor benefits were  
20 discounted. For the HSP the prescription administrative charge, normally applied to  
21 employed, working-age adults only in the UK<sup>19</sup>, associated with the antimicrobial was  
22 not incorporated into the cost analysis as this was considered an out-of-pocket  
23 (OOP) expense borne by the patient; this was not considered as a contribution to the  
24 HSP either i.e. reducing the net cost of care per person to the HSP, as the

1  
2  
3 1 prescription administrative charge is not applied to everyone and the full amount may  
4  
5 2 not be recouped by the HSP.<sup>20</sup> In the scenario analyses, a societal costing  
6  
7 3 perspective (SCP) was also adopted reflecting the overall economic burden of the  
8  
9 4 dexamethasone relative to the placebo. This included productivity losses due to sick  
10  
11 5 days i.e. reported time off due to missed work or education and reported inability to  
12  
13 6 carry out usual activities, and OOP expenses. Further scenarios assessed sub-  
14  
15 7 groups based on patient characteristics. The sub-group who highlighted they were  
16  
17 8 current smokers at the time of the trial were assessed in a scenario analysis due to  
18  
19 9 the extra healthcare burden smokers have relative to non-smokers.<sup>21</sup> Descriptions of  
20  
21 10 all 20 analyses are presented in the **Online Appendix** (Table A2).

22  
23  
24  
25 11 Each element of costs and outcomes were reported separately, consistent with a  
26  
27 12 cost-consequence analysis; the resource use reported was for the full ITT cohort (i.e.  
28  
29 13 no missing resource use data) and the HRQoL data reported in the disaggregated  
30  
31 14 format was for complete cases i.e. n=337; 60% of the full cohort. Missing HRQoL  
32  
33 15 data was assessed and classified as missing at random (MAR) (see **Online**  
34  
35 16 **Appendix**- Figure A1).<sup>16</sup> Multiple imputation analysis was performed for missing  
36  
37 17 outcome data (40%) in the ITT cohort using a number of imputations (n=60) greater  
38  
39 18 than the proportion of missing data.<sup>22</sup> The range of covariates included in the  
40  
41 19 multiple imputation analysis along with a more comprehensive presentation of  
42  
43 20 methods is presented (see **Online Appendix**- Table A3). The trial and follow-up  
44  
45 21 duration was 28 days in total and for consistency it was assumed that HRQoL was  
46  
47 22 unchanged from day 7 to day 28 using the last value brought forward technique.<sup>23</sup>  
48  
49 23 The average utility from baseline reported across the 28 days, calculated using area  
50  
51 24 under the curve (AUC) was considered 1/13th of a quality adjusted life year (QALY).  
52  
53 25 Baseline variation in outcomes was adjusted for incorporating multiple regression  
54  
55  
56  
57  
58  
59  
60

1 and seemingly unrelated regression techniques which estimated the baseline  
2 imbalance taking into account costs and effects.<sup>16, 24</sup> QALYs exhibited a non-normal  
3 distribution (see **Online Appendix**- Figure A2) and bootstrapping techniques using  
4 1,000 iterations were applied in Microsoft Excel.<sup>25</sup> Cost-utility analysis was  
5 undertaken and incremental cost-effectiveness ratios (ICERs) were estimated and  
6 reported for the basecase analysis and all scenario analyses. ICERs were  
7 probabilistic for the basecase analysis and deterministic for the series of scenarios  
8 estimated. The analysis was undertaken in Stata version 14.1.<sup>26</sup> A cost-effectiveness  
9 plane and cost-effectiveness acceptability curve (CEAC) were constructed based on  
10 the bootstrapped sample means and net monetary benefit (NMB) was also assessed  
11 against a range of willingness to pay thresholds up to £100,000.<sup>27</sup> The NICE  
12 willingness to pay threshold of £20,000 was adopted as a decision rule to assess  
13 cost-effectiveness.<sup>27</sup>

## 15 Results

17 The ITT cohort (n=565) with 288 in the dexamethasone group and 277 in the  
18 placebo group; descriptive statistics are presented in **Table 1**. The mean age of  
19 participants was 37 years and 75% were women. There was no significant clinical  
20 difference in median time to complete symptom resolution across trial arms with both  
21 displaying complete symptom resolution by day 4; however, there was a significant  
22 difference in symptom resolution at 48 hours.<sup>28</sup> The changes in HRQoL over the 7  
23 days highlight larger differences at baseline and at 24 hours with the dexamethasone  
24 group reporting 2.9% and 2.5% higher utility scores, respectively (see **Online**

1  
2  
3 1 **Appendix**- Figure A3). Differences start to diminish (<1.5%) from day 2 onwards.  
4  
5 2 **Table 2** highlights the differences in estimated QALYs for the imputed ITT cohort.  
6  
7 3 After controlling for the baseline imbalances in HRQoL, the impact of the intervention  
8  
9 4 was negative but not statistically significant: the QALY gain was -0.00005 (95% CI: -  
10  
11 5 0.0002; 0.00011) equivalent to a loss in HRQoL of a half hour for the  
12  
13 6 dexamethasone relative to the placebo group.  
14  
15  
16 7 For the sub-group who received the delayed prescription based on clinical need, a  
17  
18 8 statistically significant benefit was evidenced after baseline imbalances were  
19  
20 9 adjusted for resulting in an approximate HRQoL gain of 13.6 hours relative to the  
21  
22 10 control group. For the sub-group who did not receive the prescription, the  
23  
24 11 dexamethasone group indicated a significant QALY loss of approximately 13 hours  
25  
26 12 relative to the placebo group. For the patient group who reported that they were  
27  
28 13 current smokers a significant QALY gain from the dexamethasone of 0.0029,  
29  
30 14 equivalent to 1 day was evidenced. At 48 hours where a significant difference in the  
31  
32 15 risk ratio of symptom resolution at 48 hours in favour of the dexamethasone [RR:  
33  
34 16 1.31 (95% CI, 1.02 to 1.68; P = .03)] was observed, the significant QALY gain  
35  
36 17 approximated to 3.7 hours for the current smokers sub-group.  
37  
38  
39 18 The average cost per patient associated with the dexamethasone and placebo  
40  
41 19 groups in the basecase analysis adopting a HSP was £73 and £69, respectively.  
42  
43 20 **Table 3** highlights total costs for the categories included in the economic evaluation.  
44  
45 21 Average costs were higher across both trial arms for the sub-group who did not  
46  
47 22 receive the delayed prescription relative to the sub-group who did (£24 and £18  
48  
49 23 higher in the placebo and dexamethasone groups respectively) driven by higher  
50  
51 24 health service utilisation; however no statistically significant impact on costs across  
52  
53 25 these sub-groups for the HSP was found. For the SCP, including the cost associated

1 with inability to carry out usual activities (Scenario I), the average cost per patient  
2 was £126 and £134 for the dexamethasone and placebo groups, respectively. This  
3 suggests a cost-saving of £7 per patient to society. For the sub-group who received  
4 the delayed prescription there was a negligible SCP reduction in the dexamethasone  
5 group of -£0.18; however, for those who did not receive the delayed prescription the  
6 SCP reduction for the substantial at -£12 signalling strong evidence of cost-savings  
7 from the use of oral dexamethasone compared to placebo.

8 In the deterministic basecase analysis (**Table 4**), the ICER was negative at -£81,400  
9 due to the size and sign of the incremental effectiveness. In the basecase  
10 probabilistic analysis, the mean ICER was -£6,440 (95% CI: -£132,151; £126,335)  
11 and the median ICER was -£304 (IQR: -£5,816; £3,877); suggesting there is  
12 considerable uncertainty around this estimate. Several societal scenarios highlighted  
13 the potential for cost-savings; however, due to outcome variability, there is  
14 insufficient evidence to suggest the dexamethasone is cost-effective. The cost-  
15 effectiveness plane (**Figure 1**) presents a visual representation of the spread of the  
16 variation in cost and effect pairs for the basecase probabilistic analysis emphasizing  
17 the wide variation in effectiveness. Due to this uncertainty, the cost-effectiveness  
18 acceptability curve (see **Online Appendix**- Figure A5), suggests the probability of  
19 cost-effectiveness is 47.9% at a £20,000 willingness to pay threshold. The mean  
20 NMB was £1.80 (SD: £351) at a £20,000 willingness to pay threshold with a 43.5%  
21 probability of the dexamethasone yielding a net benefit.

22

23

## 1 Discussion

2  
3  
4  
5  
6  
7  
8 The analysis undertaken provides the first detailed account of the cost of sore throat  
9  
10 in the UK estimating that on average, costs of treating sore throat to the healthcare  
11  
12 services payer are approximately £69 per patient and to society £134. With  
13  
14 approximately 340 million consultations annually in the UK<sup>29</sup> and one in ten due to  
15  
16 sore throat<sup>4</sup>, the economic burden is estimated at £2.35bn (or £4.56bn to society)  
17  
18 based on UK unit costs. The average cost difference was £4.07 (higher in the  
19  
20 dexamethasone group): the dexamethasone group cost differential was £5.04 i.e. the  
21  
22 cost to the HSP of the single dose of oral dexamethasone. Therefore from the HSP,  
23  
24 there is insufficient evidence to suggest the intervention is cost-effective and there is  
25  
26 some evidence to suggest the intervention may be producing a negative impact on  
27  
28 HRQoL across the whole cohort.  
29  
30  
31  
32  
33  
34

### 35 *Strengths and limitations of the study*

36  
37  
38 The study collected a wide range of demographic, clinical, quality of life and resource  
39  
40 use data using a trial-specific daily patient diary which permitted an extensive  
41  
42 exploration of uncertainty in scenario and sub-group analyses. Sub-group analysis  
43  
44 indicated that for those who received the delayed antibiotic prescription and the  
45  
46 dexamethasone versus those who received the delayed prescription and the  
47  
48 placebo, the effect on HRQoL was positive and significant and therefore the resulting  
49  
50 ICERs were cost-effective at £4,950 per QALY gain. In contrast the placebo sub-  
51  
52 group not given the delayed prescription had a significantly negative effect. GP's  
53  
54 selected patients who were perceived to be in greater clinical need for the delayed  
55  
56  
57  
58  
59  
60

1 prescription sub-arm of the trial; as this sub-group may have had increased severity  
2 of symptoms relative to their counterparts, they had more scope to improve from a  
3 clinical and HRQoL perspective which in part may explain the variation in HRQoL for  
4 the sub-groups. Additionally the average costs of those in the 'no delayed  
5 prescription' sub-group who received intervention or placebo were 30% and 45%  
6 times higher, respectively, than those in the sub-group who received the delayed  
7 prescription. Cost differences observed across sub-groups were primarily driven by  
8 higher reported health service use contacts across the trial and follow-up periods:  
9 210% increase in the 'no delayed prescription' sub-groups overall and 157% and  
10 286% higher for the intervention and placebo arms, respectively. Previous research  
11 did not find any clinical differences across delayed prescription and no treatment  
12 strategies<sup>30</sup>; however our findings suggest that the clinical and non-clinical benefits  
13 of the delayed prescription in addition to the dexamethasone need to be explored  
14 further.

15 When assessing the impact of the dexamethasone on those who reported being  
16 current smokers (n=103, equally distributed between trial arms), there was a  
17 significant increase in HRQoL from baseline suggestive of cost-effectiveness for  
18 smokers: ICER £6,533. Due to higher risk of prolonged symptoms compared to  
19 previous smokers or non-smokers, this intervention may provide an interactive anti-  
20 inflammatory perhaps akin to effects in patients with exacerbations of chronic  
21 obstructive pulmonary disease, primarily caused by smoking.

22 Adoption of a SCP highlighted cost-savings for the intervention relative to the control  
23 group. The main driver of difference in the range of scenarios adopting a SCP was  
24 the cost associated with missing work or education due to sickness. However, there



1  
2  
3 1 were also differences in reported OTC medication usage across trial arms and sub-  
4  
5 2 groups that may influence recovery.  
6  
7

8 3 The study is not without its limitations. Missing data was an issue as the main tool for  
9  
10 4 data collection was a patient completed diary at each day of the trial follow-up:  
11  
12 5 HRQoL over the 7 days was 60% complete and the resource use reported in diaries  
13  
14 6 was 62% complete. Reported resource use for HSP analysis was cross-checked  
15  
16 7 with a follow-up patient survey and medical record review and as such where no  
17  
18 8 resource use was identified for each patient across the data sources, the assumption  
19  
20 9 of zero resource use for that category is justifiable but potentially leading to some  
21  
22 10 bias in cost estimates. However, EQ-5D-5L data was collected from the patient  
23  
24 11 survey only and missing data was considerable at 40%. Although robust multiple  
25  
26 12 imputation techniques were applied to impute values, it is recognised that the range  
27  
28 13 of covariates used to impute missing data may not reflect the degree of  
29  
30 14 heterogeneity across the patient cohort. If the imputation model was mis-specified  
31  
32 15 the imputation estimates could have some degree of bias.<sup>31</sup> Due to the high  
33  
34 16 uncertainty around observed HRQoL estimates across both arms however, the  
35  
36 17 limitations associated with multiple imputation are not cause for concern. In the  
37  
38 18 analyses adopting a SCP, self-reported data on time unable to engage in usual  
39  
40 19 activities and OTC medications purchased were not imputed for those with missing  
41  
42 20 data and assumed zero for non-responders. The total cost burden to society is more  
43  
44 21 than likely underestimated as a result and the SCP cost difference across both arms  
45  
46 22 may not be as representative as the HCP cost difference.  
47  
48  
49  
50

51  
52 23 Further limitations include the interpretation of the sub-group analyses given the  
53  
54 24 small sample sizes and limitations of the data outlined. The findings based on the  
55  
56 25 sub-group analyses should be interpreted with caution and need to be assessed with  
57  
58  
59

1  
2  
3 1 appropriately powered trials. However, the sub-group analyses give greater  
4  
5 2 understanding of the wide variation in outcomes observed.  
6  
7  
8  
9  
10

11 4 *Conclusions and policy implications*  
12

13  
14 5 In conclusion, sore throat has a substantial economic burden on health care delivery  
15  
16 6 systems with this study estimating the economic burden from a HCP in the UK at  
17  
18 7 £2.35bn annually. More effective strategies for assessing and providing rapid  
19  
20 8 symptom relief could reduce the cost burden as well as improve clinical and HRQoL  
21  
22 9 outcomes. The findings of this study suggest there is considerable uncertainty in  
23  
24 10 relation to the effectiveness and HRQoL benefit of dexamethasone for sore throat  
25  
26 11 and therefore insufficient evidence to suggest cost-effectiveness or its adoption as a  
27  
28 12 viable treatment strategy. However, there was evidence suggestive of potential  
29  
30 13 benefits in several sub-groups which could be investigated further in follow-up trials.  
31  
32  
33  
34  
35  
36  
37  
38  
39  
40  
41  
42  
43  
44  
45  
46  
47  
48  
49  
50  
51  
52  
53  
54  
55  
56  
57  
58  
59  
60

## 1 **Acknowledgements**

2 The authors would like to acknowledge the full TOAST study team for their input:

3 Voysey M<sup>1</sup>, Cook J<sup>1</sup>, Allen J<sup>1</sup>, Harman K.<sup>2</sup>

4 1) Nuffield Department of Primary Care Health Sciences, University of Oxford

5 2) Department of Medicine, University of Southampton

6  
7 This paper presents independent research funded by the NIHR School for Primary  
8 Care Research Grant No. 172.

9  
10 There is no additional data available for this study.

11  
12 We have read and understood BMJ Open policy on declaration of interests and  
13 declare that we have no competing interests

14  
15 The Corresponding Author has the right to grant on behalf of all authors and does  
16 grant on behalf of all authors, a worldwide licence to the Publishers and its licensees  
17 in perpetuity, in all forms, formats and media (whether known now or created in the  
18 future), to i) publish, reproduce, distribute, display and store the Contribution, ii)  
19 translate the Contribution into other languages, create adaptations, reprints, include  
20 within collections and create summaries, extracts and/or, abstracts of the  
21 Contribution, iii) create any other derivative work(s) based on the Contribution, iv) to  
22 exploit all subsidiary rights in the Contribution, v) the inclusion of electronic links from  
23 the Contribution to third party material where-ever it may be located; and, vi) licence  
24 any third party to do any or all of the above.

25  
26 The protocol, informed consent form, participant information sheet and any proposed  
27 advertising material have received appropriate Research Ethics Committee (REC),

1  
2  
3 1 regulatory authorities (MHRA in the UK), and host institution(s) approval (REC  
4 2 reference: 12/SC/0684 NRES Committee South Central - Oxford B).  
5  
6  
7 3  
8

9 4 Contribution Statement:  
10

11 5 All authors contributed to: the conception and design of the TOAST trial analysis  
12 6 including guidance on the health economic evaluation; the drafting and revising of  
13 7 this manuscript; approval of the final version of the manuscript and are accountable  
14 8 for all aspects of the work presented.  
15  
16  
17  
18

19 9 Each author has particular areas of expertise as follows: applied economic  
20 10 evaluation leads – RB & JW (joint first authors), statistical analysis SJ, NW & RP,  
21 11 project management, project conception, design and clinical lead- GH, clinical  
22 12 leadership and guidance, interpretation and policy interpretation- AH, MT, CH, PL,  
23 13 MM.  
24  
25  
26  
27  
28  
29  
30  
31  
32

33 16 This research presents an honest, accurate, and transparent account of the  
34 17 economic evaluation of the TOAST UK study; no relevant aspects of the study have  
35 18 been omitted and the wide range of scenario analyses addresses both the clinical  
36 19 heterogeneity and variability in structural assumptions.  
37  
38  
39  
40  
41  
42  
43  
44  
45  
46  
47  
48  
49  
50  
51  
52  
53  
54  
55  
56  
57  
58  
59  
60

1  
2  
3  
4  
5  
6  
7  
8  
9  
10  
11  
12  
13  
14  
15  
16  
17  
18  
19  
20  
21  
22  
23  
24  
25  
26  
27  
28  
29  
30  
31  
32  
33  
34  
35  
36  
37  
38  
39  
40  
41  
42  
43  
44  
45  
46  
47  
48  
49  
50  
51  
52  
53  
54  
55  
56  
57  
58  
59  
60

**FIGURES AND TABLES**

**Figure 1: Cost-effectiveness plane**

For peer review only

**Table1: TOAST trial patient characteristics**

|                                                                 | Placebo Group       | Dexamethasone Group |
|-----------------------------------------------------------------|---------------------|---------------------|
| <b>All Eligible Participants (ITT)</b>                          | <b>277 (49%)</b>    | <b>288 (51%)</b>    |
| Male                                                            | 73 (13%)            | 67 (12%)            |
| Female                                                          | 204 (36%)           | 221 (39%)           |
| Mean Age <sup>a</sup>                                           | 37.3<br>(SD: 14.30) | 37.2<br>(SD: 14.36) |
| Current Smoker                                                  | 51 (9%)             | 52 (9%)             |
| <b>ANTIBIOTIC DETAILS<sup>b</sup></b>                           |                     |                     |
| Given Delayed Prescription                                      | 108 (19%)           | 115 (20%)           |
| Reported taking antibiotics                                     | 42 (7%)             | 34 (6%)             |
| Not Given Delayed Prescription                                  | 169 (30%)           | 173 (31%)           |
| Reported taking antibiotics                                     | 16 (3%)             | 16 (3%)             |
| Total reported antibiotics usage                                | 58 (10%)            | 50 (9%)             |
| <b>RESOURCE USE</b>                                             |                     |                     |
| Reported using OTC Meds (days 1-7)                              | 178 (32%)           | 173 (31%)           |
| Reported Resource Use (days 1-7)                                | 69 (12%)            | 67 (12%)            |
| Reported Resource Use in Follow-Up (days 8- 28)                 | 20 (4%)             | 30 (5%)             |
| SAE <sup>c</sup>                                                | 1 (<1%)             | 1 (<1%)             |
| Other AE                                                        | 1 (<1%)             | 0 (0%)              |
| <b>EMPLOYMENT STATUS/ SICK DAYS</b>                             |                     |                     |
| Reported Working Full-Time (22 years and over)                  | 149 (26%)           | 145 (26%)           |
| Reported Working Part-Time (22 years and over)                  | 40 (7%)             | 39 (7%)             |
| Assumed in FT/ PT Education <sup>d</sup> (18-22 years)          | 28 (5%)             | 33 (6%)             |
| Unemployed                                                      | 60 (11%)            | 71 (13%)            |
| Sick Days- Proportion Reporting >1 hr Missing (days 0-7)        | 104 (18%)           | 89 (16%)            |
| Sick Days- Proportion Reporting >1 hr Missing (days 1-7)        | 72 (13%)            | 60 (11%)            |
| Usual Activities- Proportion Reporting >1 hr Missing (days 0-7) | 137 (24%)           | 127 (22%)           |
| Usual Activities- Proportion Reporting >1 hr Missing (days 1-7) | 98 (17%)            | 104 (18%)           |

**NOTES:**

a. Mean age was estimated using the ITT population previous to the amendment to inclusion criteria constricting the upper age limit to 70 years. 14 patients were over 70 years evenly distributed across both arms.

1  
2  
3 *b. Antibiotics reported for 'sore throat' are included if prescribed within the 7 day trial period and were*  
4 *administered outside a secondary care setting. This deviates slightly from the clinical paper analysis*  
5 *classification of overall antibiotic use which included antibiotics administered in secondary care for one patient*  
6 *in the control group.*

7  
8 *c. SAE's included were categorised as 'Suspected Serious Adverse Reaction' in the clinical paper. Although 3*  
9 *such events were reported, one was linked to a further SAE ultimately resulting in death and so was excluded*  
10 *from the economic analysis.*

11 *d. Those aged 18-21 years reporting 'yes' to FT/ PT work/education question in the baseline survey were all*  
12 *categorised into education for purposes of costing productivity losses in a scenario. (See Online Appendix)*  
13  
14  
15  
16  
17  
18  
19  
20  
21  
22  
23  
24  
25  
26  
27  
28  
29  
30  
31  
32  
33  
34  
35  
36  
37  
38  
39  
40  
41  
42  
43  
44  
45  
46  
47  
48  
49  
50  
51  
52  
53  
54  
55  
56  
57  
58  
59  
60

For peer review only

**Table 2: Quality-adjusted life year (QALY) analysis**

|                                                                                                    | <b>Placebo<br/>(n=277*)<br/>Mean (SE)</b> | <b>Dexamethasone<br/>(n=288*)<br/>Mean (SE)</b> | <b>Difference<br/>(Dexamethasone<br/>- Placebo)</b> | <b>P Value</b> |
|----------------------------------------------------------------------------------------------------|-------------------------------------------|-------------------------------------------------|-----------------------------------------------------|----------------|
| Imputed unadjusted QALYS                                                                           | 0.07165<br>(0.0006)                       | 0.07199<br>(0.0005)                             | 0.00034<br>(0.0009)                                 | P < 0.000      |
| Imputed QALYs, adjusted for baseline differences                                                   | 0.07672<br>(0.0004)                       | 0.07677<br>(0.0005)                             | -0.00005<br>(0.00008)                               | P = 0.522      |
| Imputed QALYs for those given delayed prescription (adjusted)                                      | 0.0743<br>(0.0005)                        | 0.0759<br>(0.0006)                              | 0.00155<br>(0.0001)                                 | P < 0.000      |
| Imputed QALYs for those not given a delayed prescription (adjusted)                                | 0.0785<br>(0.0005)                        | 0.0770<br>(0.0007)                              | -0.00149<br>(0.0001)                                | P < 0.000      |
| Imputed QALYs with patients removed who experienced SAE or AE (adjusted) (n=562)                   | 0.0768<br>(0.0004)                        | 0.0767<br>(0.0005)                              | -0.00006<br>(0.00008)                               | P = 0.473      |
| Imputed QALYs with patients removed who were over 70 years (adjusted) (n=551)                      | 0.0766<br>(0.0004)                        | 0.0765<br>(0.0005)                              | -0.000123<br>(0.00008)                              | P = 0.128      |
| Imputed QALYs with patients who were current smokers only (adjusted) (n=103)                       | 0.0738<br>(0.0008)                        | 0.0768<br>(0.0010)                              | 0.00294<br>(0.00018)                                | P < 0.000      |
| Imputed QALYs at 24 hours, adjusted for baseline differences                                       | 0.00270<br>(0.000008)                     | 0.00271<br>(0.000010)                           | 0.00001<br>(0.000002)                               | P < 0.000      |
| Imputed QALYs at 48 hours, adjusted for baseline differences in HRQoL                              | 0.00535<br>(0.000025)                     | 0.00538<br>(0.000031)                           | 0.00003<br>(0.000005)                               | P < 0.000      |
| Imputed QALYs at 48 hours, adjusted for baseline differences in HRQoL and RR of symptom resolution | 0.00492<br>(0.000024)                     | 0.00534<br>(0.000029)                           | 0.000422<br>(0.000005)                              | P < 0.000      |

\*This sample size is based on 60 imputed data sets. SE: standard error.



**Table 3: Cost analysis**

| Cost Bundle Category                       | Description                                                                                                          | Total Cost 2015 USD |                |               | Average Cost 2015 USD |                |               |
|--------------------------------------------|----------------------------------------------------------------------------------------------------------------------|---------------------|----------------|---------------|-----------------------|----------------|---------------|
|                                            |                                                                                                                      | Placebo             | Dexa-methasone | (Dex-Placebo) | Placebo               | Dexa-methasone | (Dex-Placebo) |
| Intervention                               | Cost associated with the intervention.                                                                               | £12,188             | £14,124        | £1,936        | £44                   | £49.04         | £5.04         |
| Antibiotics-Cohort A                       | Cost associated with antibiotics reported in patient survey, follow-up survey and medical records                    | £164                | £138           | -£26          | £1                    | £0.48          | -£0.11        |
| Antibiotics-Cohort B                       | Cost associated with antibiotics reported in patient survey and medical records only.                                | £154                | £128           | -£26          | £1                    | £0.44          | -£0.11        |
| Antibiotics-Societal                       | Cost associated with antibiotics inclusive of the patient co-payment for prescriptions.                              | £689                | £581           | -£108         | £2                    | £2.02          | -£0.47        |
| Antibiotics B-Societal                     | Cost associated with antibiotics inclusive of the patient co-payment for prescriptions for Cohort B.                 | £646                | £538           | -£108         | £2                    | £1.87          | -£0.46        |
| Antibiotics-Societal for Workers           | Cost associated with antibiotics inclusive of the patient co-payment for prescriptions for workers only.             | £623                | £474           | -£149         | £2                    | £1.65          | -£0.60        |
| Antibiotics B-Societal for Workers         | Cost associated with antibiotics inclusive of the patient co-payment for prescriptions for workers only in Cohort B. | £547                | £431           | -£116         | £2                    | £1.50          | -£0.48        |
| Over-the-counter (OTC)                     | Cost associated with reported OTC in the patient diary and follow-up survey.                                         | £668                | £648           | -£20          | £2                    | £2.25          | -£0.16        |
| Resource Use-Patient Diary                 | Cost associated with resource use reported in the patient diary.                                                     | £2,639              | £2,732         | £93           | £10                   | £9.49          | -£0.04        |
| Resource Use-Follow-up Survey              | Cost associated with resource use reported in the follow-up survey.                                                  | £4,082              | £4,008         | -£74          | £15                   | £13.92         | -£0.82        |
| Productivity Losses- Day 0-7 and Follow-up | Cost of missed days due to illness reported in the                                                                   | £22,668             | £19,469        | -£3,199       | £82                   | £67.60         | -£14.23       |

|                                                        |                                                                                                                                        |         |           |         |         |         |         |
|--------------------------------------------------------|----------------------------------------------------------------------------------------------------------------------------------------|---------|-----------|---------|---------|---------|---------|
|                                                        | patient diary and follow-up survey.                                                                                                    |         |           |         |         |         |         |
| Productivity Losses (B)- Day 0-7 and Follow-up         | Cost of missed days due to illness assuming all 18-21 year olds were in education.                                                     | £21,505 | £18,634   | -£2,871 | £78     | £64.70  | -£12.93 |
| Productivity Losses- Day 1-7 and Follow-up             | Cost of missed days due to illness reported in the patient diary from day 1 and follow-up survey.                                      | £14,846 | £12,699   | -£2,147 | £54     | £44.09  | -£9.50  |
| Productivity Losses (B)- Day 1-7 and Follow-up         | Cost of missed days due to illness (from day 1) assuming all 18-21 year olds were in education.                                        | £14,176 | £12,140   | -£2,036 | £51     | £42.15  | -£9.02  |
| Usual Activities- Day 0-7 and Follow-up                | Cost associated with missing time due to illness for usual activities reported in the patient diary and follow-up survey.              | £4,904  | £5,052    | £148    | £18     | £17.54  | -£0.16  |
| Usual Activities- Day 1-7 and Follow-up                | Cost associated with missing time due to illness (from day 1) for usual activities reported in the patient diary and follow-up survey. | £3,444  | £3,672    | £228    | £12     | £12.75  | £0.32   |
|                                                        |                                                                                                                                        |         |           |         |         |         |         |
| Total HSP Costs- Primary Analysis                      |                                                                                                                                        | £19,073 | £21,002   | £1,929  | £68.86  | £72.92  | £4.07   |
| Total HSP Costs- without SAE's/ AEs (n=562) Option (A) |                                                                                                                                        | £15,610 | £18,349   | £2,739  | £56.76  | £63.93  | £7.17   |
| Total HSP Costs- Delayed Prescription                  |                                                                                                                                        | £5,830  | £7,119.00 | £1,289  | £53.99  | £61.90  | £7.91   |
| Total HSP Costs- No Delayed Prescription               |                                                                                                                                        | £13,243 | £13,883   | £640    | £78.36  | £80.25  | £1.89   |
| Total HSP Costs- Smokers Only (n=103)                  |                                                                                                                                        | £6,059  | £2,787    | -£3,272 | £118.81 | £53.60  | -£65.21 |
| Total SCP Option (I)                                   |                                                                                                                                        | £37,076 | £36,409   | -£667   | £133.85 | £126.42 | -£7.43  |
| Total SCP without SAE's/ AEs (n=562)                   |                                                                                                                                        | £33,012 | £33,726   | -£667   | £120.04 | £117.51 | -£2.53  |

|                                          |  |         |         |         |         |         |          |
|------------------------------------------|--|---------|---------|---------|---------|---------|----------|
| Total SCP-<br>Delayed<br>Prescription    |  | £12,995 | £13,816 | £821    | £120.32 | £120.14 | -£0.18   |
| Total SCP-<br>No Delayed<br>Prescription |  | £24,081 | £22,593 | -£1,488 | £142.49 | £130.59 | -£11.90  |
| Total SCP-<br>Smokers Only<br>(n=103)    |  | £8,739  | £3,259  | -£5,480 | £171.35 | £62.68  | -£108.67 |

*NOTE: Cohort A has an additional 8 patients included who reported antibiotic use in follow-up surveys only.*

*Cohort B does not include these patients in keeping with the statistical analysis plan outlined for the clinical analysis.*

For peer review only

**Table 4: Cost-utility analysis (deterministic models)**

|                                              | <i>Control</i> | <i>Intervention</i> | $\Delta$ in Cost | $\Delta$ in Effect <sup>a</sup> | ICER      | Interpretation <sup>b</sup>             |
|----------------------------------------------|----------------|---------------------|------------------|---------------------------------|-----------|-----------------------------------------|
| <b>Healthcare Services Payer Perspective</b> |                |                     |                  |                                 |           |                                         |
| <b>Basecase</b>                              | £68.86         | £72.92              | £4.07            | -0.00005                        | -£81,400  | <i>Not cost-effective</i>               |
| <b>Scenario A</b>                            | £56.76         | £63.93              | £7.17            | -0.00010                        | -£71,700  | <i>Not cost-effective</i>               |
| <b>Scenario B</b>                            | £69.22         | £73.37              | £4.15            | -0.00012                        | -£33,850  | <i>Not cost-effective</i>               |
| <b>Scenario C</b>                            | £53.99         | £61.90              | £7.92            | 0.00160                         | £4,950    | <i>Cost-effective</i>                   |
| <b>Scenario D</b>                            | £78.36         | £80.25              | £1.89            | -0.0015                         | -£1,260   | <i>Not cost-effective</i>               |
| <b>Scenario E</b>                            | £57.58         | £77.18              | £19.60           | 0.0030                          | £6,533    | <i>Cost-effective</i>                   |
| <b>Scenario F</b>                            | £68.86         | £72.92              | £4.07            | 0.00001                         | £407,000  | <i>Not cost-effective</i>               |
| <b>Scenario G</b>                            | £68.86         | £72.92              | £4.07            | 0.00042                         | £9,690    | <i>Cost-effective</i>                   |
| <b>Scenario H<sup>f</sup></b>                | £68.86         | £72.92              | £4.07            | -0.0038                         | -£1,071   | <i>Not cost-effective</i>               |
| <b>Societal Cost Perspective</b>             |                |                     |                  |                                 |           |                                         |
| <b>Scenario I</b>                            | £133.85        | £126.42             | -£7.43           | -0.00005                        | £148,600  | <i>Not cost-effective</i>               |
| <b>Scenario J</b>                            | £167.36        | 154.72              | -£12.64          | -0.00005                        | £252,800  | <i>Not cost-effective</i>               |
| <b>Scenario K</b>                            | £120.04        | £117.51             | -£2.53           | -0.00010                        | £25,300   | <i>Not cost-effective</i>               |
| <b>Scenario L</b>                            | £135.51        | £127.59             | -£7.92           | -0.00005                        | £158,400  | <i>Not cost-effective</i>               |
| <b>Scenario M</b>                            | £135.23        | £127.44             | -£7.79           | -0.00005                        | £155,800  | <i>Not cost-effective</i>               |
| <b>Scenario N</b>                            | £120.32        | £120.14             | -£0.18           | 0.00160                         | -£112     | <i>Cost-effective &amp; Cost-saving</i> |
| <b>Scenario O</b>                            | £142.49        | £130.59             | -£11.90          | -0.00150                        | £7,933    | <i>Not cost-effective</i>               |
| <b>Scenario P</b>                            | £171.35        | £62.68              | -£108.67         | 0.0030                          | -£36,223  | <i>Cost-effective &amp; Cost-saving</i> |
| <b>Scenario Q</b>                            | £133.85        | £126.42             | -£7.43           | 0.00001                         | -£743,000 | <i>Cost-effective &amp; Cost-saving</i> |
| <b>Scenario R</b>                            | £133.85        | £126.42             | -£7.43           | 0.00042                         | -£17,690  | <i>Cost-effective &amp; Cost-saving</i> |
| <b>Scenario S<sup>c</sup></b>                | £133.85        | £126.42             | -£7.43           | -0.0038                         | £1,955    | <i>Not cost-effective</i>               |

**NOTES:**

a. Changes in effect have been adjusted for baseline differences for each model and are representative of an annual timeframe (see Table 2 for more details).

1  
2  
3 *b. Not cost-effective is suggested if the effect is negative and therefore the ICER is negative; not cost-effective*  
4 *may also be suggested when the ICER is positive due to both a negative cost and effect i.e. positioned in the*  
5 *South-West quadrant of the cost-effectiveness plane, depending on the WTP threshold. As the stated WTP*  
6 *threshold is £20,000 per QALY gain, all positive ICERs due to positive costs and effects that are over £20,000 are*  
7 *also deemed not cost-effective. Also note that confidence intervals were not reported as the analysis are*  
8 *deterministic and non-linear; therefore confidence intervals could not be meaningfully interpreted.*  
9 *c. Average unadjusted EQ-VAS scores across baseline to day 7 are presented in the online appendix. After*  
10 *adjustments for imbalance at baseline, the incremental effect was negative at -0.174 at day 7. The change in*  
11 *effect presented in the table above has been adjusted to represent an annual timeframe consistent with cost*  
12 *per QALY interpretation.*  
13  
14  
15  
16  
17  
18  
19  
20  
21  
22  
23  
24  
25  
26  
27  
28  
29  
30  
31  
32  
33  
34  
35  
36  
37  
38  
39  
40  
41  
42  
43  
44  
45  
46  
47  
48  
49  
50  
51  
52  
53  
54  
55  
56  
57  
58  
59  
60

For peer review only

## REFERENCES

- 1 Roos K, Claesson R, Persson U, Odegaard K. The economic cost of a streptococcal tonsillitis episode Scandinavian Journal of Primary Healthcare 1995 13: 257-260
- 2 HMSO Morbidity Statistics in General practice : Fourth national Study HMSO 1994
- 3 Gulliford M, Latinovic R, Charlton J, Little P, van Staa T, Ashworth M. Selective decrease in consultations and antibiotics prescribing for acute respiratory tract infection sin UK primary care up to 2006. Journal of Public Health 2009; 31(4), 512-520
- 4 Del Mar CB, Glasziou PP, Spinks AB. Antibiotics for sore throat. Cochrane Database Systematic Reviews 2006; (4):CD000023.
- 5 NICE guideline. Respiratory Tract Infections - antibiotic prescribing. Prescribing of antibiotics for self-limiting respiratory tract infections in adults and children in primary care. 2008. National Institute for Clinical Excellence. Ref Type: Report.
- 6 Centers for Disease Control and Prevention. Get Smart: Know When Antibiotics Work in Doctor's Offices: Adult Treatment Recommendations. <https://www.cdc.gov/getsmart/community/for-hcp/outpatient-hcp/adult-treatment-rec.html> last updated: March 2016. Accessed June 19, 2017
- 7 Guilliford MC, Dregan A, Moore M et al. Continued high rates of antibiotic prescribing to adults with respiratory tract infection: survey of 568 UK general practices. BMJ Open 2014; 4(10)
- 8 Hayward G, Thompson M, Heneghan C, Perera R, Del Mar C, Glasziou P. Corticosteroids for pain relief in sore throat: systematic review and meta-analysis. BMJ 2009; 339:b2976
- 9 Costelloe C, Metcalfe C, Lovering A, Mant D, Hay AD. Effect of antibiotic prescribing in primary care on antimicrobial resistance in individual patients: systematic review and meta-analysis. *BMJ*. 2010;340(May18\_2):c2096
- 10 Cook J, Hayward G, Thompson M, et al. Oral corticosteroid use for clinical and cost-effective symptom relief of sore throat: study protocol for a randomized controlled trial. *Trials* 2014; 15, 365  
DOI: 10.1186/1745-6215-15-365

- 
- 1  
2  
3  
4 <sup>11</sup> Devlin N, Krabbe P. "The development of new research methods for the  
5 valuation of EQ-5D-5L." *European Journal of Health Economics* 2013; 14(1): S1-S3  
6  
7 <sup>12</sup> Devlin N, et al 2016 Valuing Health-Related Quality of Life: An EQ-5D-5L Value  
8 Set for England. Office of Health Economics research paper 16/01  
9  
10 <sup>13</sup> PSSRU "Unit Costs of Health and Social Care 2015"  
11 <http://www.pssru.ac.uk/project-pages/unit-costs/2015/>  
12  
13 <sup>14</sup> British National Formulary (2015)  
14 <https://www.medicinescomplete.com/mc/bnf/current/>  
15  
16 <sup>15</sup> Boots Online Pharmacy (2015) [www.boots.com](http://www.boots.com)  
17  
18 <sup>16</sup> Department of Health Reference Cost 2014/2015; London 2015  
19  
20 <sup>17</sup> Office of National Statistics. Annual Survey of Hours and Earnings, 2014.  
21 [www.ons.gov.uk](http://www.ons.gov.uk) Accessed June 6, 2017  
22  
23 <sup>18</sup> Office of National Statistics. Consumer Price Inflation Index. [www.ons.gov.uk](http://www.ons.gov.uk)  
24 Accessed June 6, 2017  
25  
26 <sup>19</sup> Pharmaceutical Services Negotiating Committee. Exemptions from the  
27 prescription charge. [http://psnc.org.uk/dispensing-supply/receiving-a-](http://psnc.org.uk/dispensing-supply/receiving-a-prescription/patient-charges/exemptions/)  
28 [prescription/patient-charges/exemptions/](http://psnc.org.uk/dispensing-supply/receiving-a-prescription/patient-charges/exemptions/) Accessed June 9, 2017  
29  
30 <sup>20</sup> NHS Choices. NHS in England- help with health costs.  
31 <http://www.nhs.uk/NHSEngland/Healthcosts/Pages/Prescriptioncosts.aspx> Accessed  
32 June 6, 2017  
33  
34 <sup>21</sup> Wacker M, Holle R, Heinrich J, et al. The association of smoking status with  
35 healthcare utilisation, productivity loss and resulting costs: results from the  
36 population-based KORA F4 study. *BMC Health Services Research* 2013; 13:278  
37  
38 <sup>22</sup> Faria R, Gomes M, Epstein D, et al. A Guide to Handling Missing Data in Cost-  
39 Effectiveness Analysis Conducted Within Randomised Controlled Trials.  
40 *Pharmacoeconomics* 2014; 32(12):1157-70.  
41  
42 <sup>23</sup> Hunter R, Baio G, Butt T, Morris S, Round J, Freemantle N. An Educational  
43 Review of the Statistical Issues in Analysing Utility Data for Cost-Utility Analysis.  
44 *Pharmacoeconomics* 2015; 33(4): 355-366  
45  
46 <sup>24</sup> Manca A, Hawkins N, Sculpher MJ. Estimating mean QALYs in trial-based cost-  
47 effectiveness analysis: the importance of controlling for baseline utility. *Health*  
48 *Economics* 2005; 14(5):487-96.  
49  
50  
51  
52  
53  
54  
55  
56  
57  
58  
59  
60

- 1  
2  
3  
4  
5  
6  
7  
8  
9  
10  
11  
12  
13  
14  
15  
16  
17  
18  
19  
20  
21  
22  
23  
24  
25  
26  
27  
28  
29  
30  
31  
32  
33  
34  
35  
36  
37  
38  
39  
40  
41  
42  
43  
44  
45  
46  
47  
48  
49  
50  
51  
52  
53  
54  
55  
56  
57  
58  
59  
60
- 
- <sup>25</sup> Glick HA, Doshi JA, Sonnad SS, Polsky D. Economic Evaluation in Clinical Trials. Handbooks in Health Economics, Volume 2. Oxford: Oxford University Press, 2015
- <sup>26</sup> StataCorp. Stata Statistical Software: Release 14. 14.1 ed. College Station, TX: StataCorp LP. ; 2015.
- <sup>27</sup> NICE. Guide to methods of technology appraisal. Manchester, 2013
- <sup>28</sup> Hayward G, Hay A, Moore M. et al. Effect of Oral Dexamethasone Without Immediate Antibiotics vs Placebo on Acute Sore Throat in Adults A Randomized Clinical Trial. JAMA 2017; 317(15):1535-1543. doi:10.1001/jama.2017.3417
- <sup>29</sup> British Medical Association (BMA). General Practice in the UK – background briefing. April 2017 <https://www.bma.org.uk/-/media/files/pdfs/.../general-practice.pdf?la=en> Accessed June 19, 2017
- <sup>30</sup> Little P, Moore M, Leydon G, Mullee M and Stuart B. Delayed antibiotic prescribing strategies for respiratory tract infections in primary care: pragmatic, factorial, randomised controlled trial. BMJ 2014; 348:g1606
- <sup>31</sup> Horton NJ and Kleinman KP. Much ado about nothing: A comparison of missing data methods and software to fit incomplete data regression models. Am Stat 2017; 61(1): 79-90



1  
2  
3  
4  
5  
6  
7  
8  
9  
10  
11  
12  
13  
14  
15  
16  
17  
18  
19  
20  
21  
22  
23  
24  
25  
26  
27  
28  
29  
30  
31  
32  
33  
34  
35  
36  
37  
38  
39  
40  
41

BMJ Open

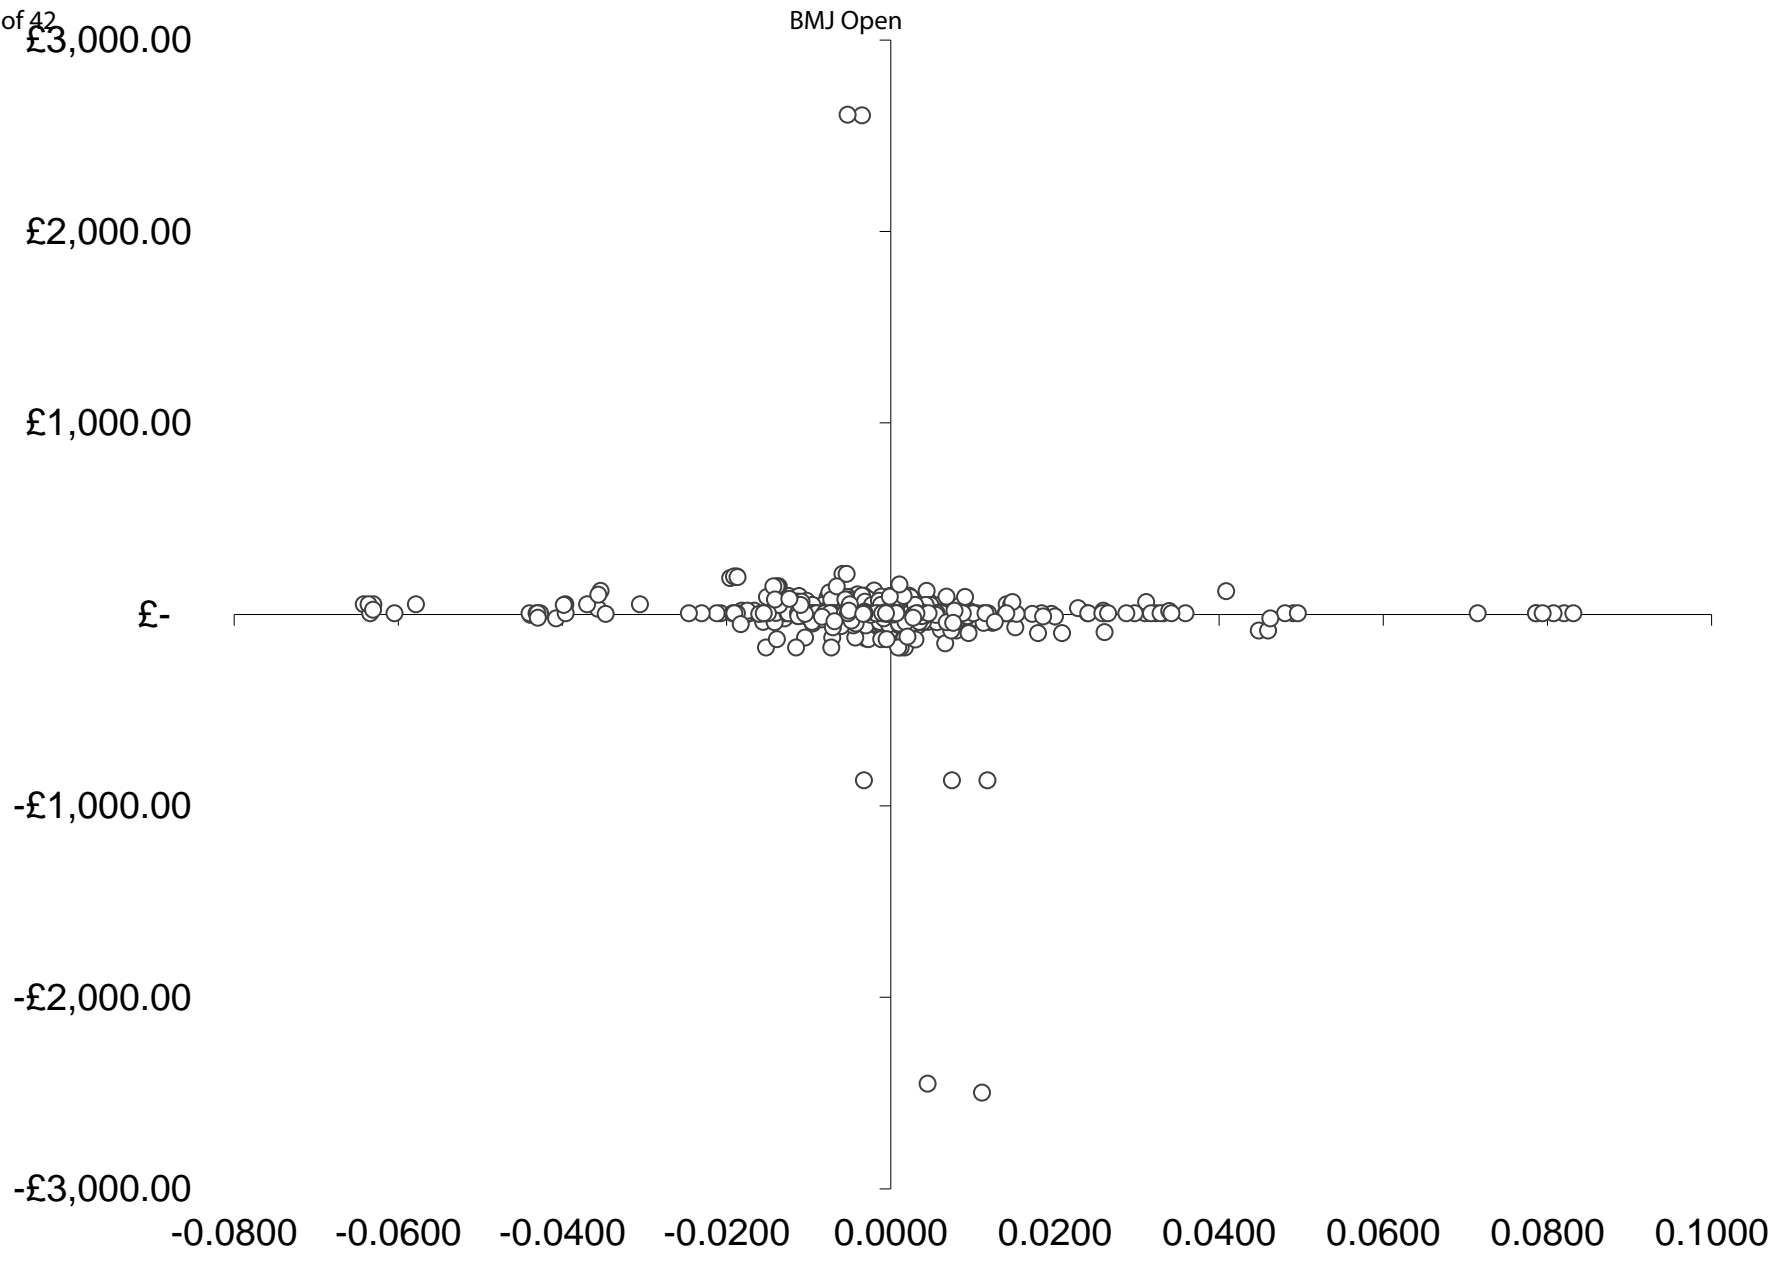

## TOAST ONLINE APPENDIX

Table A1- Trial Resource Use Costs

| TOAST TRIAL UNIT COSTS (2015 £) |                                                   |          |                              |                                                  |
|---------------------------------|---------------------------------------------------|----------|------------------------------|--------------------------------------------------|
| Cost ID                         | Cost Description                                  | 2015 (£) | Measure                      | Details                                          |
| Int1                            | Oral Steroid                                      | £ 5.04   | 1 dose                       | single 10mg dose of oral dexamethasone, BNF 2015 |
| Int2                            | GP Visit                                          | £ 44.00  | 11.7 minute consult          | PSSRU 2015                                       |
| Int3                            | Pharmacist                                        | £ 6.00   | 5 minute consult             | British National Formulary (BNF) 2015            |
| Anti1                           | Penicillin                                        | £ 0.04   | per 250mg tab                | BNF 2015                                         |
| Anti2                           | Erythromycin                                      | £ 0.04   | per 250mg tab                | BNF 2015                                         |
| Anti3                           | Clarithromycin                                    | £ 0.21   | per 500mg tab                | BNF 2015                                         |
| Anti4                           | Amoxicillin                                       | £ 0.08   | per 500mg tab                | BNF 2015                                         |
| Anti5                           | Coamoxiclav                                       | £ 0.20   | per 500mg tab                | BNF 2015                                         |
| Anti6                           | Doxycycline                                       | £ 0.14   | per 500mg tab                | BNF 2015                                         |
| Otc1                            | Paracetamol                                       | £ 0.24   | per recommended daily dose   | Boots Pharmacy Generic Brand, 2015               |
| Otc2                            | Ibuprofen (NSAIDS)                                | £ 0.60   | per recommended daily dose   | Boots Pharmacy Generic Brand, 2015               |
| Otc3                            | Anaesthetic spray                                 | £ 1.25   | per recommended daily dose   | Boots Pharmacy Generic Brand, 2015               |
| Otc4                            | Anaesthetic lozenges                              | £ 1.40   | per recommended daily dose   | Boots Pharmacy Generic Brand, 2015               |
| Otc5                            | Decongestant                                      | £ 1.00   | per recommended daily dose   | Boots Pharmacy Generic Brand, 2015               |
| Otc6                            | Lozenges (non-analgesic)                          | £ 0.66   | per recommended daily dose   | Boots Pharmacy Generic Brand, 2015               |
| Otc7                            | Other analgesia (cocodamol/ cough medicine, etc.) | £ 1.05   | per recommended daily dose   | Boots Pharmacy Generic Brand, 2015               |
| Wage1                           | Cost of an adult working day                      | £ 119.37 | median gross annual earnings | Office of National Statistics (UK)               |
| Wage2                           | Minimum wage day rate                             | £ 53.60  | October 2015 value           | Office of National Statistics (UK)               |
| Admin1                          | NHS prescription charge                           | £ 8.20   |                              | National Health Service (UK)-(NHS)               |
| Res1                            | GP Nurse                                          | £ 14.47  | 15.5 minute consult          | PSSRU 2015                                       |
| Res2                            | GP Telephone Call                                 | £ 27.00  | 7.1 minute call              | PSSRU 2015                                       |
| Res3                            | Out-of-Hours GP Clinic                            | £ 69.53  |                              | NAO.org                                          |
| Res4                            | 111 Telephone Advice                              | £ 8.14   |                              | Micro-costing study, University of Sheffield     |
| Res5                            | A&E                                               | £ 140.59 | Average weighted cost        | NHS Ref Costs 2015                               |
| Res6                            | Hospital Bed Day - average                        | £ 613.63 | Average weighted cost        | NHS Ref Costs 2015                               |
| Pres1                           | Codeine (co-codamol 30/500)                       | £ 0.06   | per tablet                   | BNF 2015                                         |
| Pres2                           | Codeine Linctus                                   | £ 0.16   | 15mg/ 5 ml                   | BNF 2015                                         |
| Pres3                           | Benzylamine (Difflam Oromucosal Spray)            | £ 1.41   | 0.15% Spray/ 1 ml            | BNF 2015                                         |
| Pres4                           | Benzyl Penicillin & Metronidazole IV              | £ 12.24  | Daily dose (TBC)             | BNF 2015                                         |

**Table A2- Summary of Economic Analysis Scenarios**

| Options         | Perspective | Details                                                                                                                                                                                                                                                                       |
|-----------------|-------------|-------------------------------------------------------------------------------------------------------------------------------------------------------------------------------------------------------------------------------------------------------------------------------|
| <b>Basecase</b> | HSP         | The basecase scenario included the net cost of the intervention i.e. the cost of the once-off medication, the cost of antibiotics used and the cost of resource use reported including serious adverse events. The adjusted QALY estimate was adopted as the outcome measure. |
| <b>A</b>        | HSP         | Basecase was adjusted to remove effects and costs of serious adverse events (one in each arm) and adverse events (one in the control group) (n=562).                                                                                                                          |
| <b>B</b>        | HSP         | Basecase was adjusted to remove those over age 70 (seven in each arm removed) (n=551).                                                                                                                                                                                        |
| <b>C</b>        | HSP         | Basecase was restricted to only those who received a delayed prescription (n=223).                                                                                                                                                                                            |
| <b>D</b>        | HSP         | Basecase was restricted to those who did not receive a delayed prescription (n=342).                                                                                                                                                                                          |
| <b>E</b>        | HSP         | Basecase was restricted to only those reporting current smoker status (n=103).                                                                                                                                                                                                |
| <b>F</b>        | HSP         | Basecase was adjusted and the imputed EQ-5D-5L differences from baseline at 24 hours were used as the outcome measure.                                                                                                                                                        |
| <b>G</b>        | HSP         | Basecase was adjusted and the imputed EQ-5D-5L differences from baseline at 48 hours were used as the outcome measure.                                                                                                                                                        |
| <b>H</b>        | HSP         | Basecase was adjusted and the imputed EQ-VAS averages from baseline to Day 7 were used as the outcome measure.                                                                                                                                                                |
| <b>I</b>        | SCP         | Basecase was combined with costs associated with over-the-counter medications used , productivity losses due to missed days at work/ school for days 1 to 7 of the trial follow-up and costs associated with inability to carry out usual activities for days 1 to 7.         |
| <b>J</b>        | SCP         | Basecase was combined with costs associated with over-the-counter medications used , productivity losses due to missed days at work/ school for days 0 to 7 of the trial follow-up and costs associated with inability to carry out usual activities for days 0 to 7.         |
| <b>K</b>        | SCP         | Option I was adjusted to remove costs of serious adverse events (one in each arm) and adverse events (one in the control group) (n=562).                                                                                                                                      |
| <b>L</b>        | SCP         | Option I was combined with antibiotic prescription charges that would be paid by workers/ students.                                                                                                                                                                           |
| <b>M</b>        | SCP         | Option I was combined with antibiotic prescription charges that would be paid by workers only.                                                                                                                                                                                |
| <b>N</b>        | SCP         | Option I was restricted to only those who received a delayed prescription (n=223).                                                                                                                                                                                            |
| <b>O</b>        | SCP         | Option I was restricted to those who did not receive a delayed prescription (n=342).                                                                                                                                                                                          |
| <b>P</b>        | SCP         | Option I was restricted to only those reporting current smoker status (n=103).                                                                                                                                                                                                |
| <b>Q</b>        | SCP         | Option I adopted the outcome measured at 24 hours                                                                                                                                                                                                                             |
| <b>R</b>        | SCP         | Option I adopted the outcome measured at 48 hours                                                                                                                                                                                                                             |
| <b>S</b>        | SCP         | Option I was adjusted and the imputed EQ-VAS averages from baseline to Day 7 were used as the outcome measure.                                                                                                                                                                |

**Table A3: Summary of multiple imputation analysis methods**

The following variables were used in the multiple imputation dataset:

- EQ-5D-5L index values for day 0-7
- EQ-VAS scores for day 0-7
- Symptom resolution at 24 hours and 48 hours
- A treatment arm identifier
- A dichotomous variable to highlight patient experienced an SAE
- A dichotomous variable for delayed antibiotic prescription given
- Costs: intervention, antibiotics, OTC medication, resource use day 1-7, resource use day 8-28, missed work/ education, missed usual activities
- Patient characteristics: gender, age, employment status, location of care, current smoker, a dichotomous variable for those aged 71 and over.

The 'ICE' command in STATA was used for multiple imputation using chained equations was used. The data was multiply imputed generating 60 datasets using predictive mean matching and separately by treatment allocation based on the variation present in the complete data above. The 'seed' add-on sets a random number seed (this was set at 10), which is useful to improve consistency across imputations.

The following is the STATA code used:

```
"ice index_5L_day0 index_5L_day1 index_5L_day2 index_5L_day3 index_5L_day4 index_5L_day5
index_5L_day6 index_5L_day7 VAS_day0 VAS_day1 VAS_day2 VAS_day3 VAS_day4 VAS_day5 VAS_day6
VAS_day7 sae outlier resol48 cost_reportedantibiouse totalcost_OTC resourceusediary_cost
resourceuseFU_cost missed_days_costday1tounk cost_usualact1tounk trt delayed_script Male worker age
current_smoker location age71andover, saving(MI_aggregated, replace) m(60) match genmiss(indmiss)
by(trt) seed(10)"
```

**Table A4: Quality of Life Analysis for ITT Impute Cohort (unadjusted)**

| <b>EQ-5D-5L Imputed Full ITT</b>                   |         |              |            |           |
|----------------------------------------------------|---------|--------------|------------|-----------|
|                                                    | Control | Intervention | Diff (I-C) | % Δ (I-C) |
| <b>Baseline</b>                                    | 0.746   | 0.766        | 0.0196     | 2.62%     |
| <b>Day 1</b>                                       | 0.829   | 0.848        | 0.0189     | 2.28%     |
| <b>Day 2</b>                                       | 0.861   | 0.871        | 0.0092     | 1.07%     |
| <b>Day 3</b>                                       | 0.904   | 0.907        | 0.0023     | 0.25%     |
| <b>Day 4</b>                                       | 0.918   | 0.931        | 0.0132     | 1.43%     |
| <b>Day 5</b>                                       | 0.932   | 0.940        | 0.0074     | 0.79%     |
| <b>Day 6</b>                                       | 0.939   | 0.950        | 0.0112     | 1.19%     |
| <b>Day 7</b>                                       | 0.947   | 0.949        | 0.0028     | 0.30%     |
| <b>QAW<sup>1</sup></b>                             | 6.289   | 6.354        | 0.0652     | 1.04%     |
| <b>EQ-5D VAS Imputed Full ITT</b>                  |         |              |            |           |
|                                                    | Control | Intervention | Diff (I-C) | % Δ (I-C) |
| <b>Baseline</b>                                    | 49.78   | 52.41        | 2.631      | 5.29%     |
| <b>Day 1</b>                                       | 57.99   | 60.83        | 2.840      | 4.90%     |
| <b>Day 2</b>                                       | 64.44   | 64.57        | 0.126      | 0.19%     |
| <b>Day 3</b>                                       | 70.98   | 70.27        | -0.714     | -1.01%    |
| <b>Day 4</b>                                       | 74.74   | 74.35        | -0.389     | -0.52%    |
| <b>Day 5</b>                                       | 78.66   | 77.16        | -1.497     | -1.90%    |
| <b>Day 6</b>                                       | 81.99   | 80.25        | -1.733     | -2.11%    |
| <b>Day 7</b>                                       | 84.94   | 82.37        | -2.571     | -3.03%    |
| <b>aVAS<sup>2</sup></b>                            | 70.44   | 70.27        | -0.162     | -0.23%    |
| <b>Delayed Prescription- Imputed ITT Cohort</b>    |         |              |            |           |
|                                                    | Control | Intervention | Diff (I-C) | % Δ (I-C) |
| <b>Baseline</b>                                    | 0.7431  | 0.7303       | -0.0128    | -1.72%    |
| <b>Day 1</b>                                       | 0.8158  | 0.8404       | 0.0246     | 3.01%     |
| <b>Day 2</b>                                       | 0.8384  | 0.8576       | 0.0193     | 2.30%     |
| <b>Day 3</b>                                       | 0.9061  | 0.9180       | 0.0119     | 1.31%     |
| <b>Day 4</b>                                       | 0.9180  | 0.9441       | 0.0261     | 2.85%     |
| <b>Day 5</b>                                       | 0.9276  | 0.9579       | 0.0303     | 3.27%     |
| <b>Day 6</b>                                       | 0.9390  | 0.9649       | 0.0259     | 2.76%     |
| <b>Day 7</b>                                       | 0.9480  | 0.9663       | 0.0183     | 1.93%     |
| <b>QAW<sup>1</sup></b>                             | 6.2569  | 6.3943       | 0.1374     | 2.20%     |
| <b>No Delayed Prescription- Imputed ITT Cohort</b> |         |              |            |           |
|                                                    | Control | Intervention | Diff (I-C) | % Δ (I-C) |
| <b>Baseline</b>                                    | 0.7480  | 0.7892       | 0.0411     | 5.50%     |
| <b>Day 1</b>                                       | 0.8381  | 0.8535       | 0.0154     | 1.84%     |
| <b>Day 2</b>                                       | 0.8762  | 0.8793       | 0.0031     | 0.35%     |
| <b>Day 3</b>                                       | 0.9035  | 0.8993       | -0.0041    | -0.46%    |
| <b>Day 4</b>                                       | 0.9179  | 0.9225       | 0.0046     | 0.50%     |
| <b>Day 5</b>                                       | 0.9351  | 0.9273       | -0.0078    | -0.83%    |
| <b>Day 6</b>                                       | 0.9382  | 0.9396       | 0.0014     | 0.14%     |
| <b>Day 7</b>                                       | 0.9457  | 0.9382       | -0.0075    | -0.79%    |
| <b>QAW<sup>1</sup></b>                             | 6.3099  | 6.3281       | 0.0182     | 0.29%     |

1. Quality-adjusted week estimated using area under the curve estimation.

2. Average VAS score estimated average across baseline to day 7.

Table A5: Quality of Life Analysis for Complete Cases (unadjusted)

| EQ-5D-5L Analysis                            |                |                   |                                |         |
|----------------------------------------------|----------------|-------------------|--------------------------------|---------|
|                                              | Control        | Intervention      | Difference (I-C)               | P value |
|                                              | n=172          | n=165             |                                |         |
| <b>Baseline</b>                              | 0.735          | 0.755             | 0.021                          | ns      |
| <b>Day 1</b>                                 | 0.821          | 0.843             | 0.021                          | ns      |
| <b>Day 2</b>                                 | 0.862          | 0.871             | 0.01                           | ns      |
| <b>Day 3</b>                                 | 0.899          | 0.903             | 0.004                          | ns      |
| <b>Day 4</b>                                 | 0.916          | 0.926             | 0.01                           | ns      |
| <b>Day 5</b>                                 | 0.929          | 0.933             | 0.003                          | ns      |
| <b>Day 6</b>                                 | 0.939          | 0.947             | 0.007                          | ns      |
| <b>Day 7</b>                                 | 0.947          | 0.951             | 0.004                          | ns      |
| <b>Average (Day 1-7)</b>                     | 0.902          | 0.91              | 0.008                          | ns      |
| <b>Average Δ (%) from Baseline</b>           | 0.167 (22.7)   | 0.155 (20.5)      | -0.012                         | ns      |
| <b>Average Δ (%) from Baseline at 24 hrs</b> | 0.087 (11.8)   | 0.087 (11.5)      | 0                              | ns      |
| <b>Average Δ (%) from Baseline at 48 hrs</b> | 0.107 (14.6)   | 0.101 (13.4)      | -0.005                         | ns      |
| EQ-VAS Analysis                              |                |                   |                                |         |
|                                              | Control        | Intervention      | Difference (I-C)               | P value |
|                                              | n=166          | n=161             |                                |         |
| <b>Baseline</b>                              | 49             | 52                | 3                              | ns      |
| <b>Day 1</b>                                 | 57             | 61                | 4                              | ns      |
| <b>Day 2</b>                                 | 64             | 65                | 1                              | ns      |
| <b>Day 3</b>                                 | 70             | 70                | 0                              | ns      |
| <b>Day 4</b>                                 | 75             | 74                | -1                             | ns      |
| <b>Day 5</b>                                 | 79             | 77                | -2                             | ns      |
| <b>Day 6</b>                                 | 82             | 80                | -2                             | ns      |
| <b>Day 7</b>                                 | 86             | 83                | -3                             | ns      |
| <b>Average (Day 1-7)</b>                     | 73             | 73                | 0                              | ns      |
| <b>Average Δ (%) from Baseline</b>           | 24 (49)        | 21 (40)           | -3                             | ns      |
| <b>Average Δ (%) from Baseline at 24 hrs</b> | 8 (16)         | 9 (17)            | 1                              | ns      |
| <b>Average Δ (%) from Baseline at 48 hrs</b> | 15 (31)        | 13 (25)           | -2                             | ns      |
| EQ-5D-5L Sub-group Analysis                  |                |                   |                                |         |
|                                              | Delayed Script | No Delayed Script | Difference (Delayed-No Script) | P value |
|                                              | n=121          | n=216             |                                |         |
| <b>Baseline</b>                              | 0.709          | 0.765             | -0.055                         | 0.005   |
| <b>Day 1</b>                                 | 0.813          | 0.842             | -0.029                         | 0.059   |
| <b>Day 2</b>                                 | 0.878          | 0.846             | -0.032                         | 0.041   |
| <b>Day 3</b>                                 | 0.903          | 0.9               | 0.003                          | ns      |
| <b>Day 4</b>                                 | 0.925          | 0.919             | 0.006                          | ns      |
| <b>Day 5</b>                                 | 0.935          | 0.929             | 0.006                          | ns      |
| <b>Day 6</b>                                 | 0.948          | 0.94              | 0.008                          | ns      |
| <b>Day 7</b>                                 | 0.959          | 0.943             | 0.016                          | ns      |
| <b>Average (Day 1-7)</b>                     | 0.904          | 0.907             | -0.003                         |         |
| <b>Average Δ (%) from Baseline</b>           | 0.195 (27.5)   | 0.143 (18.7)      | 0.052                          | 0.001   |
| <b>Average Δ (%) from Baseline at 24 hrs</b> | 0.119 (20.7)   | 0.092 (14.1)      | 0.027                          | ns      |
| <b>Average Δ (%) from Baseline at 48 hrs</b> | 0.180 (31.3)   | 0.151 (23.3)      | 0.029                          | ns      |

Figure A1: Missingness assessment in EQ-5D-5L

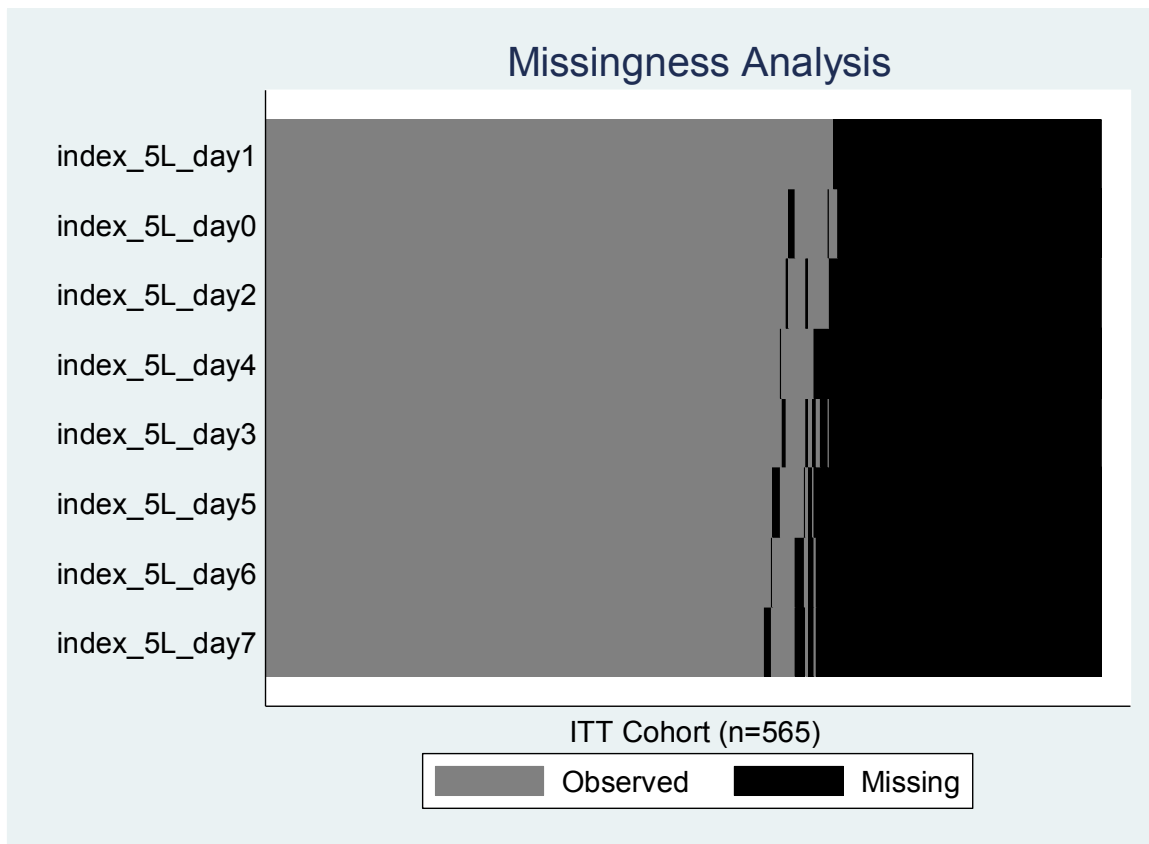

Figure A2: QALY distribution by treatment arm

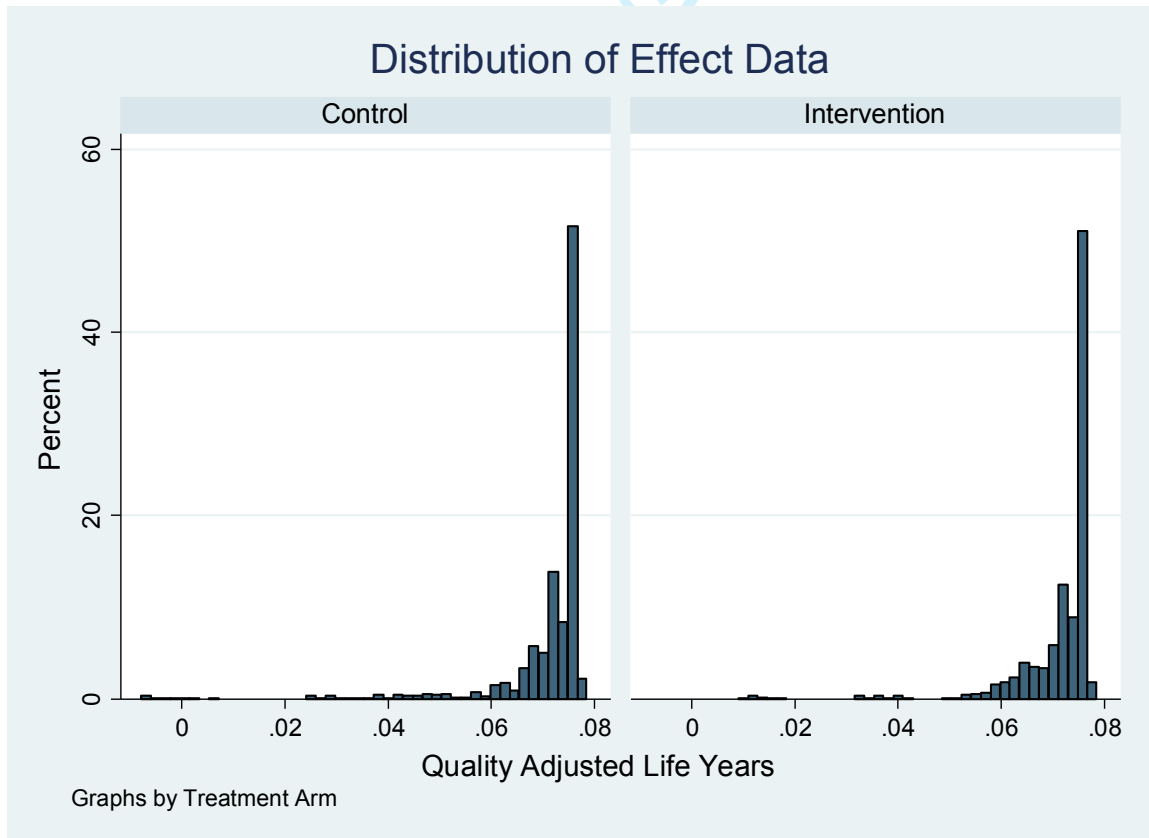

Figure A3: EQ-5D-5L Imputed Scores for ITT Cohort

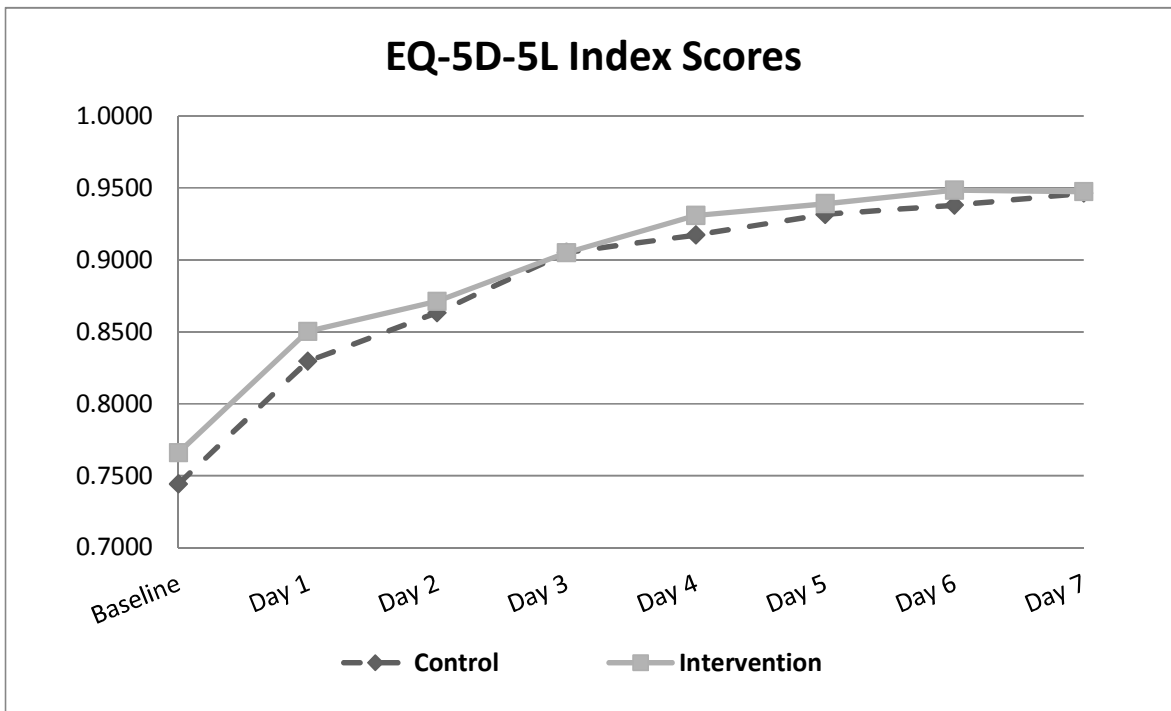

Figure A4: EQ-5D Visual Analogue Scale Imputed Scores for ITT Cohort

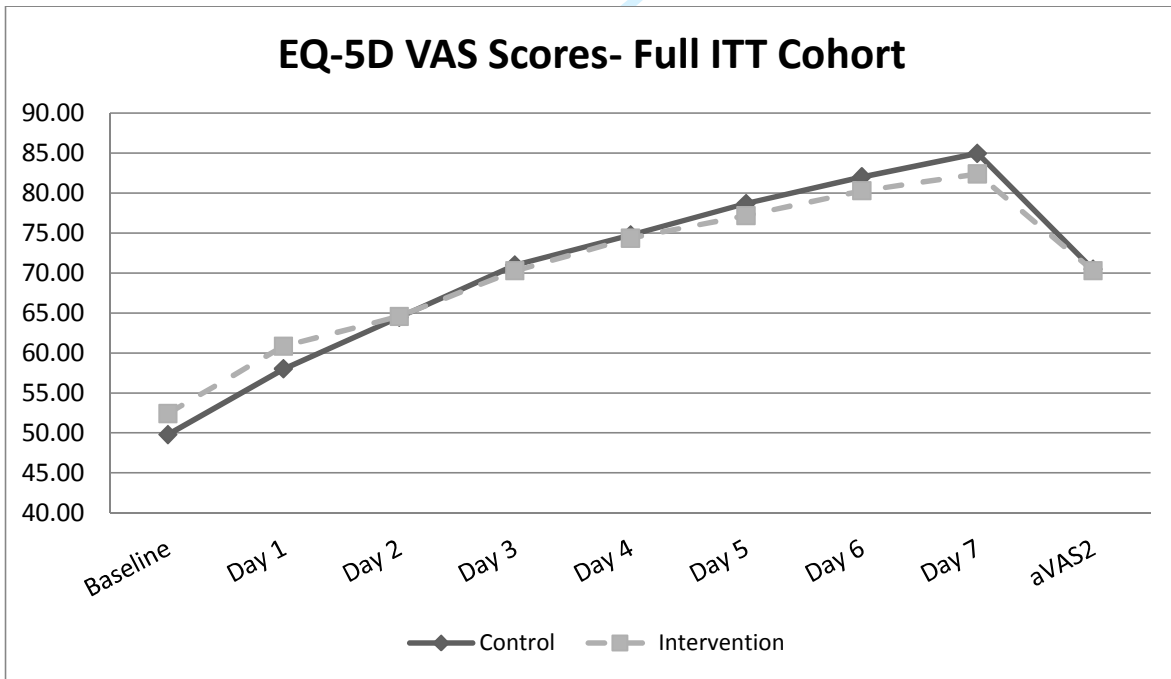



Figure A5: Cost-effectiveness Acceptability Curve

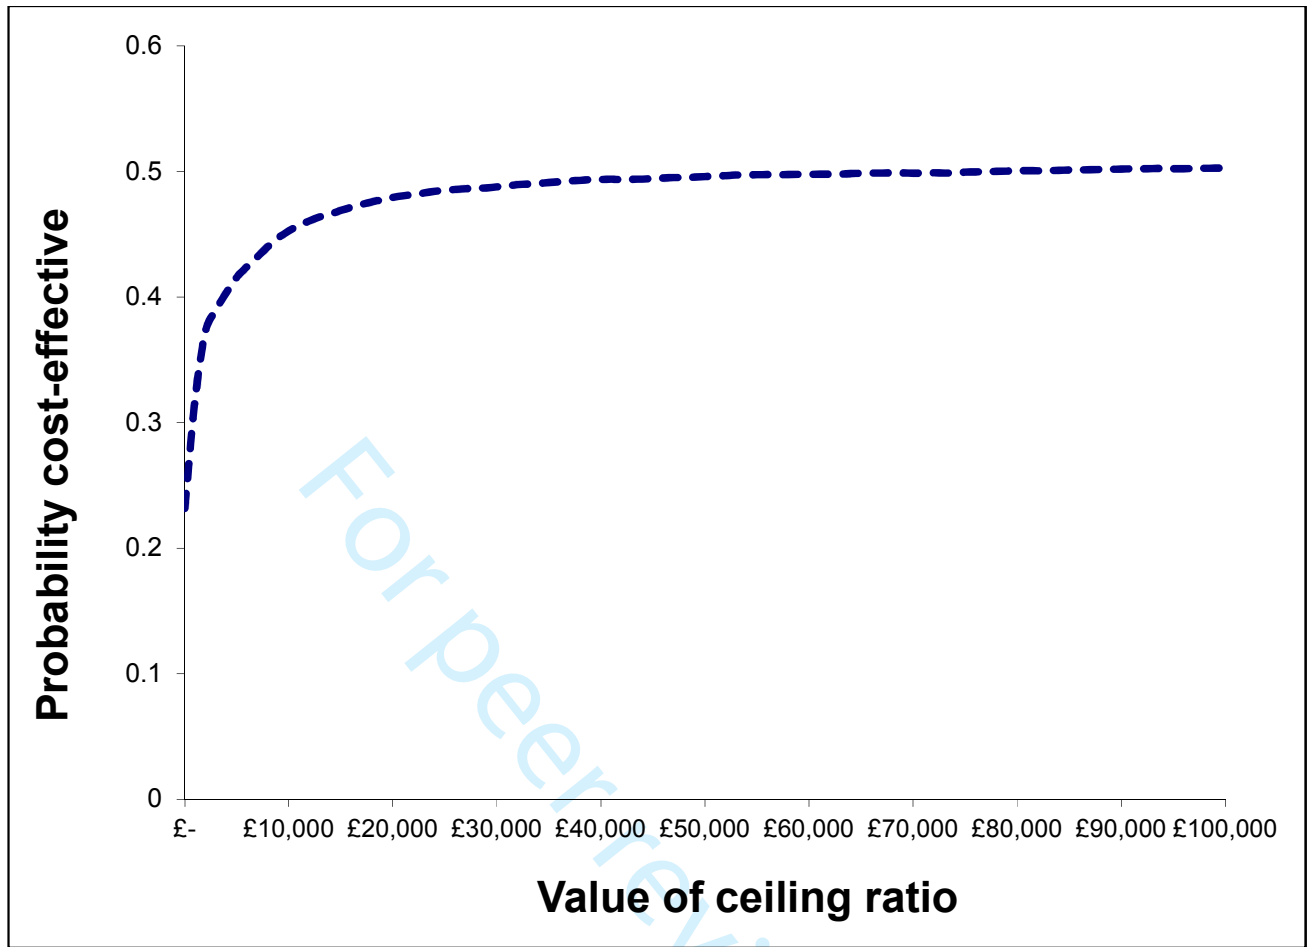

For peer review only

1  
2  
3  
4  
5  
6  
7  
8  
9  
10  
11  
12  
13  
14  
15  
16  
17  
18  
19  
20  
21  
22  
23  
24  
25  
26  
27  
28  
29  
30  
31  
32  
33  
34  
35  
36  
37  
38  
39  
40  
41  
42  
43  
44  
45  
46  
47  
48  
49  
50  
51  
52  
53  
54  
55  
56  
57  
58  
59  
60

1  
 2 \* "An Economic Analysis of Oral Dexamethasone for Symptom Relief  
 3 of Sore Throat: The UK TOAST Study"  
 4 The CHEERS Checklist is part of the CHEERS Statement. The CHEERS Statement has been  
 5 endorsed and co-published by the following journals:  
 6  
 7  
 8  
 9  
 10  
 11  
 12  
 13  
 14  
 15  
 16  
 17  
 18

BJOG: An International Journal of Obstetrics and Gynaecology  
BMC Medicine 2013; 11:80  
BMJ 2013;346:f1049  
Clinical Therapeutics 27 March 2013 (Article in Press DOI: 10.1016/j.clinthera.2013.03.003)  
Cost Effectiveness and Resource Allocation 2013 11:6.  
The European Journal of Health Economics 2013 Mar 26. [Epub ahead of print]  
 International Journal of Technology Assessment in Health Care  
Journal of Medical Economics 2013 Mar 25. [Epub ahead of print]  
Pharmacoeconomics 2013 Mar 26. [Epub ahead of print]  
Value in Health 2013 March - April;16(2):e1-e5

19  
 20 **CHEERS Checklist**  
 21 **Items to include when reporting economic evaluations of health interventions**  
 22

| Section/item                    | Item No | Recommendation                                                                                                                                                                          | Reported on page No/line No |
|---------------------------------|---------|-----------------------------------------------------------------------------------------------------------------------------------------------------------------------------------------|-----------------------------|
| <b>Title and abstract</b>       |         |                                                                                                                                                                                         |                             |
| Title                           | 1       | Identify the study as an economic evaluation or use more specific terms such as “cost-effectiveness analysis”, and describe the interventions compared.                                 | 1   1                       |
| Abstract                        | 2       | Provide a structured summary of objectives, perspective, setting, methods (including study design and inputs), results (including base case and uncertainty analyses), and conclusions. | 3 & 4                       |
| <b>Introduction</b>             |         |                                                                                                                                                                                         |                             |
| Background and objectives       | 3       | Provide an explicit statement of the broader context for the study.<br>Present the study question and its relevance for health policy or practice decisions.                            | 5                           |
| <b>Methods</b>                  |         |                                                                                                                                                                                         |                             |
| Target population and subgroups | 4       | Describe characteristics of the base case population and subgroups analysed, including why they were chosen.                                                                            | 6                           |
| Setting and location            | 5       | State relevant aspects of the system(s) in which the decision(s) need(s) to be made.                                                                                                    | 6                           |
| Study perspective               | 6       | Describe the perspective of the study and relate this to the costs being evaluated.                                                                                                     | 6                           |
| Comparators                     | 7       | Describe the interventions or strategies being compared and state why they were chosen.                                                                                                 | 6                           |
| Time horizon                    | 8       | State the time horizon(s) over which costs and consequences are being evaluated and say why appropriate.                                                                                | 6                           |
| Discount rate                   | 9       | Report the choice of discount rate(s) used for costs and                                                                                                                                | n/a                         |

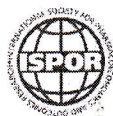

|    |                         |     |                                                                        |                       |
|----|-------------------------|-----|------------------------------------------------------------------------|-----------------------|
| 1  |                         |     |                                                                        |                       |
| 2  |                         |     | outcomes and say why appropriate.                                      | <u>6</u>              |
| 3  | Choice of health        | 10  | Describe what outcomes were used as the measure(s) of                  |                       |
| 4  | outcomes                |     | benefit in the evaluation and their relevance for the type of          |                       |
| 5  |                         |     | analysis performed.                                                    | <u>6&amp;7</u>        |
| 6  | Measurement of          | 11a | <i>Single study-based estimates</i> : Describe fully the design        |                       |
| 7  | effectiveness           |     | features of the single effectiveness study and why the single          |                       |
| 8  |                         |     | study was a sufficient source of clinical effectiveness data.          | <u>7&amp;8</u>        |
| 9  |                         | 11b | <i>Synthesis-based estimates</i> : Describe fully the methods used for |                       |
| 10 |                         |     | identification of included studies and synthesis of clinical           |                       |
| 11 |                         |     | effectiveness data.                                                    | <u>n/a</u>            |
| 12 |                         | 12  | If applicable, describe the population and methods used to             |                       |
| 13 | Measurement and         |     | elicit preferences for outcomes.                                       | <u>n/a</u>            |
| 14 | valuation of preference |     |                                                                        |                       |
| 15 | based outcomes          |     |                                                                        |                       |
| 16 | Estimating resources    | 13a | <i>Single study-based economic evaluation</i> : Describe approaches    |                       |
| 17 | and costs               |     | used to estimate resource use associated with the alternative          |                       |
| 18 |                         |     | interventions. Describe primary or secondary research methods          |                       |
| 19 |                         |     | for valuing each resource item in terms of its unit cost.              |                       |
| 20 |                         |     | Describe any adjustments made to approximate to opportunity            |                       |
| 21 |                         |     | costs.                                                                 | <u>7</u>              |
| 22 |                         | 13b | <i>Model-based economic evaluation</i> : Describe approaches and       |                       |
| 23 |                         |     | data sources used to estimate resource use associated with             |                       |
| 24 |                         |     | model health states. Describe primary or secondary research            |                       |
| 25 |                         |     | methods for valuing each resource item in terms of its unit            |                       |
| 26 |                         |     | cost. Describe any adjustments made to approximate to                  |                       |
| 27 |                         |     | opportunity costs.                                                     | <u>7</u>              |
| 28 |                         | 14  | Report the dates of the estimated resource quantities and unit         |                       |
| 29 | Currency, price date,   |     | costs. Describe methods for adjusting estimated unit costs to          |                       |
| 30 | and conversion          |     | the year of reported costs if necessary. Describe methods for          |                       |
| 31 |                         |     | converting costs into a common currency base and the                   |                       |
| 32 |                         |     | exchange rate.                                                         | <u>8</u>              |
| 33 | Choice of model         | 15  | Describe and give reasons for the specific type of decision-           |                       |
| 34 |                         |     | analytical model used. Providing a figure to show model                |                       |
| 35 |                         |     | structure is strongly recommended.                                     | <u>8&amp;9&amp;10</u> |
| 36 | Assumptions             | 16  | Describe all structural or other assumptions underpinning the          |                       |
| 37 |                         |     | decision-analytical model.                                             | <u>8&amp;9&amp;10</u> |
| 38 | Analytical methods      | 17  | Describe all analytical methods supporting the evaluation. This        |                       |
| 39 |                         |     | could include methods for dealing with skewed, missing, or             |                       |
| 40 |                         |     | censored data; extrapolation methods; methods for pooling              |                       |
| 41 |                         |     | data; approaches to validate or make adjustments (such as half         |                       |
| 42 |                         |     | cycle corrections) to a model; and methods for handling                |                       |
| 43 |                         |     | population heterogeneity and uncertainty.                              | <u>8&amp;9&amp;10</u> |
| 44 |                         |     |                                                                        |                       |
| 45 |                         |     |                                                                        |                       |
| 46 |                         |     |                                                                        |                       |
| 47 |                         |     |                                                                        |                       |
| 48 |                         |     |                                                                        |                       |
| 49 |                         |     |                                                                        |                       |
| 50 |                         |     |                                                                        |                       |
| 51 | <b>Results</b>          |     |                                                                        |                       |
| 52 | Study parameters        | 18  | Report the values, ranges, references, and, if used, probability       |                       |
| 53 |                         |     | distributions for all parameters. Report reasons or sources for        |                       |
| 54 |                         |     | distributions used to represent uncertainty where appropriate.         |                       |
| 55 |                         |     | Providing a table to show the input values is strongly                 |                       |
| 56 |                         |     | recommended.                                                           | <u>10-12</u>          |
| 57 |                         |     |                                                                        |                       |
| 58 |                         |     |                                                                        |                       |
| 59 |                         |     |                                                                        | <u>&amp; Online</u>   |
| 60 |                         |     |                                                                        | <u>appendix</u>       |

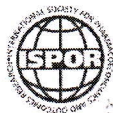

|    |                       |     |                                                                     |
|----|-----------------------|-----|---------------------------------------------------------------------|
| 1  |                       |     |                                                                     |
| 2  | Incremental costs and | 19  | For each intervention, report mean values for the main              |
| 3  | outcomes              |     | categories of estimated costs and outcomes of interest, as well     |
| 4  |                       |     | as mean differences between the comparator groups. If               |
| 5  |                       |     | applicable, report incremental cost-effectiveness ratios.           |
| 6  | Characterising        | 20a | <i>Single study-based economic evaluation:</i> Describe the effects |
| 7  | uncertainty           |     | of sampling uncertainty for the estimated incremental cost and      |
| 8  |                       |     | incremental effectiveness parameters, together with the impact      |
| 9  |                       |     | of methodological assumptions (such as discount rate, study         |
| 10 |                       |     | perspective).                                                       |
| 11 |                       | 20b | <i>Model-based economic evaluation:</i> Describe the effects on the |
| 12 |                       |     | results of uncertainty for all input parameters, and uncertainty    |
| 13 |                       |     | related to the structure of the model and assumptions.              |
| 14 | Characterising        | 21  | If applicable, report differences in costs, outcomes, or cost-      |
| 15 | heterogeneity         |     | effectiveness that can be explained by variations between           |
| 16 |                       |     | subgroups of patients with different baseline characteristics or    |
| 17 |                       |     | other observed variability in effects that are not reducible by     |
| 18 |                       |     | more information.                                                   |
| 19 |                       |     |                                                                     |
| 20 |                       |     |                                                                     |
| 21 |                       |     |                                                                     |
| 22 | <b>Discussion</b>     |     |                                                                     |
| 23 | Study findings,       | 22  | Summarise key study findings and describe how they support          |
| 24 | limitations,          |     | the conclusions reached. Discuss limitations and the                |
| 25 | generalisability, and |     | generalisability of the findings and how the findings fit with      |
| 26 | current knowledge     |     | current knowledge.                                                  |
| 27 |                       |     |                                                                     |
| 28 | <b>Other</b>          |     |                                                                     |
| 29 | Source of funding     | 23  | Describe how the study was funded and the role of the funder        |
| 30 |                       |     | in the identification, design, conduct, and reporting of the        |
| 31 |                       |     | analysis. Describe other non-monetary sources of support.           |
| 32 |                       |     |                                                                     |
| 33 | Conflicts of interest | 24  | Describe any potential for conflict of interest of study            |
| 34 |                       |     | contributors in accordance with journal policy. In the absence      |
| 35 |                       |     | of a journal policy, we recommend authors comply with               |
| 36 |                       |     | International Committee of Medical Journal Editors                  |
| 37 |                       |     | recommendations.                                                    |
| 38 |                       |     |                                                                     |

For consistency, the CHEERS Statement checklist format is based on the format of the CONSORT statement checklist

The CHEERS Statement may be accessed by the publication links above.

The ISPOR CHEERS Task Force Report provides examples and further discussion of the 24-item CHEERS Checklist and the CHEERS Statement. It may be accessed via the *Value in Health* link or via the ISPOR Health Economic Evaluation Publication Guidelines – CHEERS: Good Reporting Practices webpage: <http://www.ispor.org/TaskForces/EconomicPubGuidelines.asp>

The citation for the CHEERS Task Force Report is:  
 Husereau D, Drummond M, Petrou S, et al. Consolidated health economic evaluation reporting standards (CHEERS)—Explanation and elaboration: A report of the ISPOR health economic evaluations publication guidelines good reporting practices task force. *Value Health* 2013;16:231-50.

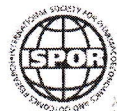

# BMJ Open

## An Economic Analysis of Oral Dexamethasone for Symptom Relief of Sore Throat: The UK TOAST Study

|                                 |                                                                                                                                                                                                                                                                                                                                                                                                                                                                                                                                                                                                                                                                                                                                                                                                                                           |
|---------------------------------|-------------------------------------------------------------------------------------------------------------------------------------------------------------------------------------------------------------------------------------------------------------------------------------------------------------------------------------------------------------------------------------------------------------------------------------------------------------------------------------------------------------------------------------------------------------------------------------------------------------------------------------------------------------------------------------------------------------------------------------------------------------------------------------------------------------------------------------------|
| Journal:                        | <i>BMJ Open</i>                                                                                                                                                                                                                                                                                                                                                                                                                                                                                                                                                                                                                                                                                                                                                                                                                           |
| Manuscript ID                   | bmjopen-2017-019184.R1                                                                                                                                                                                                                                                                                                                                                                                                                                                                                                                                                                                                                                                                                                                                                                                                                    |
| Article Type:                   | Research                                                                                                                                                                                                                                                                                                                                                                                                                                                                                                                                                                                                                                                                                                                                                                                                                                  |
| Date Submitted by the Author:   | 07-Feb-2018                                                                                                                                                                                                                                                                                                                                                                                                                                                                                                                                                                                                                                                                                                                                                                                                                               |
| Complete List of Authors:       | Burns, Richeal; University of Oxford, Nuffield Department of Population Health<br>Wolstenholme, Jane; University of Oxford, Nuffield Department of Population Health<br>Jawad, Sena; Neonatal Data Analysis Unit, Department of Medicine, Imperial College London<br>Williams, Nicola; Nuffield Department of Primary Care Health Sciences, University of Oxford<br>Thompson, Matthew; University of Washington, Department of Family Medicine<br>Perera, Rafael; University of Oxford, Primary Health Care<br>Hay, Alastair; University of Bristol, School of Social and Community Medicine<br>Heneghan, Carl; Oxford University, Primary Health Care<br>Little, Paul; University of Southampton, Medical School,<br>Moore, Michael; Three Swans Surgery<br>Hayward, Gail; Oxford University, Department of Primary Care Health Sciences |
| <b>Primary Subject Heading</b>: | Health economics                                                                                                                                                                                                                                                                                                                                                                                                                                                                                                                                                                                                                                                                                                                                                                                                                          |
| Secondary Subject Heading:      | Medical management, Health policy, Ear, nose and throat/otolaryngology                                                                                                                                                                                                                                                                                                                                                                                                                                                                                                                                                                                                                                                                                                                                                                    |
| Keywords:                       | cost-utility analysis, PRIMARY CARE, sore throat                                                                                                                                                                                                                                                                                                                                                                                                                                                                                                                                                                                                                                                                                                                                                                                          |
|                                 |                                                                                                                                                                                                                                                                                                                                                                                                                                                                                                                                                                                                                                                                                                                                                                                                                                           |

SCHOLARONE™  
Manuscripts

1  
2  
3 **1 Title: An Economic Analysis of Oral Dexamethasone for Symptom Relief of**  
4 **2 Sore Throat: The UK TOAST Study**

5  
6  
7 3 Authors: Richéal M Burns\* PhD, Jane Wolstenholme\* PhD, Sena Jawad MSc, Nicola  
8 4 Williams MSc, Matthew Thompson PhD, Rafael Perera D.Phil, Alastair D Hay  
9 5 FRCGP, Carl Heneghan D.Phil, Paul Little FMedSci, Michael Moore FRCGP, Gail  
10 6 Hayward D.Phil, on behalf of the TOAST Trial Investigators

11  
12  
13  
14 7 Health Economics Research Centre, Nuffield Department of Population Health, University of  
15 8 Oxford. Richéal M Burns and Jane Wolstenholme researcher in health economics, Nuffield  
16 9 Department of Population Health, University of Oxford. Sena Jawad trial statistician,  
17 10 Neonatal Data Analysis Unit, Department of Medicine, Imperial College London. Nicola  
18 11 Williams senior trial statistician, Nuffield Department of Primary Care Health Sciences,  
19 12 University of Oxford. Matthew Thompson professor of family medicine, Department of  
20 13 Family Medicine, University of Washington. Rafael Perera director of medical statistics,  
21 14 Nuffield Department of Primary Care Health Sciences, University of Oxford. Alastair Hay  
22 15 professor of primary care, Centre for Academic Primary Care, NIHR School for Primary Care  
23 16 Research, School of Social and Community Medicine, University of Bristol. Carl Heneghan  
24 17 professor of primary care, Nuffield Department of Primary Care Health Sciences, University  
25 18 of Oxford. Paul Little professor of primary care, Primary Care and Population Science, NIHR  
26 19 School for Primary Care Research, Faculty of Medicine, University of Southampton. Michael  
27 20 Moore professor of primary care, Primary Care and Population Science, NIHR School for  
28 21 Primary Care Research, Faculty of Medicine, University of Southampton. Gail Hayward  
29 22 academic clinical lecturer, Nuffield Department of Primary Care Health Sciences, University  
30 23 of Oxford.

31  
32  
33  
34  
35  
36  
37  
38  
39 25 Corresponding Author:

40  
41 26 Dr. Richéal M. Burns

42  
43 27 Health Economic Research Centre,

44  
45 28 Nuffield Department of Population Health, University of Oxford

46  
47 29 Tel: +44 (0) 1865 289269

48  
49 30 Email: [rburns@stangelas.nuigalway.ie](mailto:rburns@stangelas.nuigalway.ie)

50  
51 31

52  
53 32

54  
55 33

## Abstract

**Objectives:** To undertake an economic analysis assessing the cost-effectiveness of a single dose of oral dexamethasone compared to placebo for the relief of sore throat.

**Design:** A UK-based, multicentre, two arm, individually randomised, double blind trial

**Setting and Population:** Adults ( $\geq 18$  years) with acute sore throat and painful swallowing judged to be infective in origin, recruited and randomised in primary care.

**Intervention:** A single dose of 10mg oral dexamethasone compared to placebo given at primary care visit.

**Main Outcome:** Incremental cost-effectiveness ratios (ICERs), cost per quality-adjusted symptom resolution using the EQ-5D-5L instrument, were estimated as part of a cost-utility analysis performed on an intention-to-treat cohort adopting a health payers perspective.

**Results:** Differences in health-related quality of life (HRQoL) over 7 days from baseline and at 24 hours in the dexamethasone compared with the placebo group (2.9% and 2.5% higher, respectively) were observed. After controlling for the baseline HRQoL imbalances, the economic impact of the intervention was not statistically significant: the QALY difference was -0.00005 (95% CI: -0.0002; 0.00011) equivalent to a loss in HRQoL of a half hour in the dexamethasone group.

The average cost per patient associated in the dexamethasone and placebo groups in the basecase analysis was £73 and £69, respectively. In the basecase probabilistic analysis, the mean ICER was -£6,440 (95% CI: -£132,151; £126,335) and the median ICER was -£304 (IQR: -£5,816; £3,877); suggesting considerable uncertainty.

1  
2  
3  
4  
5  
6  
7  
8  
9  
10  
11  
12  
13  
14  
15  
16  
17  
18  
19  
20  
21  
22  
23  
24  
25  
26  
27  
28  
29  
30  
31  
32  
33  
34  
35  
36  
37  
38  
39  
40  
41  
42  
43  
44  
45  
46  
47  
48  
49  
50  
51  
52  
53  
54  
55  
56  
57  
58  
59  
60

1 Conclusions and relevance: The economic burden associated with sore throat is  
2 substantial and was estimated at £2.35bn to the healthcare services payer based on  
3 reported resource use and 2015 UK unit costs. There is considerable uncertainty  
4 regarding the cost-effectiveness of a single dose of oral dexamethasone as a  
5 treatment strategy and therefore insufficient evidence to support its use in clinical  
6 practice.

7 Trial Registration: ISRCTN17435450 <http://www.isrctn.com/ISRCTN17435450>

8  
9 Key words: cost-utility analysis, primary care interventions, sore throat



## Strengths and limitations of this study

1. The analysis undertaken provides the first detailed account of the cost of sore throat in the UK.
2. The study collected a wide range of demographic, clinical, quality of life and resource use data using a trial-specific daily patient diary which permitted an extensive exploration of uncertainty in scenario and sub-group analyses.
3. Both health services payer and societal perspectives were assessed in the economic evaluation.
4. In contrast to previous research highlighting no clinical differences across delayed prescription and no treatment strategies, this analysis suggests that clinical and non-clinical benefits of the delayed prescription in addition to the dexamethasone need to be explored further.
5. Reported resource use for HSP analysis was cross-checked with a follow-up patient survey and medical record review and as such where no resource use was identified for each patient across the data sources, the assumption of zero resource use for that category is justifiable but potentially leading to some bias in cost estimates.

## 1 Introduction

2

3 An estimated £400 million annually is spent on consultations and lost productivity

4 associated with sore throat alone in the UK.<sup>1,2</sup> Almost one in ten registered UK

5 patients will see their general practitioner (GP) every year with sore throat.<sup>3</sup> 91% of

6 those diagnosed with tonsillitis will receive antibiotics, as will half of those recorded

7 as 'sore throat' or 'pharyngitis'.<sup>4</sup> NICE and International guidance recognises the

8 limited evidence for benefit of antibiotics in its advice to avoid prescriptions in the

9 majority of patients<sup>5-6</sup>; however, prescribing rates remain disproportionately high

10 even though patients attend mainly due to anxiety over symptoms.<sup>7</sup> A key driver for

11 patients to attend with a sore throat is the severity of their symptoms, so affective

12 symptomatic treatment may help reduce patient reliance on antibiotic. Furthermore

13 where antibiotics are used for streptococcal infections more rapid clinical

14 improvement is also plausible with steroids<sup>8</sup> which could facilitate shorter courses of

15 antibiotics, which would improve both prescribing and the overall economic burden of

16 sore throat. Further, negative externalities associated with over-prescribing

17 antibiotics, predominantly the increasing issue of antimicrobial resistance<sup>9</sup>, could

18 also be moderated. The Treatment Options without Antibiotics for Sore Throat

19 (TOAST) trial<sup>10</sup> addressed whether or not oral corticosteroids provide clinical and

20 cost-effective benefits through symptom relief of sore throat. The findings of the trial

21 highlighted no clinical impact of a single dose of oral dexamethasone compared with

22 placebo for resolution of symptoms at 24 hours; however, at 48 hours there was a

23 significant improvement for patients receiving the intervention.<sup>11</sup> The cost-

24 effectiveness analysis alongside the TOAST trial assessed the costs and benefits of

1 a single dose of 10mg oral dexamethasone compared to placebo for the symptom  
2 relief of sore throat.

## 4 **Methods**

### 6 *Intervention*

7 TOAST was a multicentre, two arm, individually randomised, double blind trial  
8 comparing a single dose of 10mg oral dexamethasone with identical placebo in  
9 adults aged between 18 and 70 years<sup>1</sup> inclusive, presenting to primary care with  
10 acute sore throat. Recruitment took place in 42 primary care clinics in England from  
11 April 2013 to February 2015. The intervention period assessed was 7 days post-  
12 presentation and participants were followed up for 28 days to assess resource use  
13 and adverse events. A sub-group of patients in each trial arm received a delayed  
14 prescription for antibiotics at the discretion of the GP and randomisation was  
15 stratified by this decision. Further details on trial design, are published elsewhere.<sup>6</sup>  
16 The research protocol was approved by the National Research Ethics Committee  
17 South Central (12/SC/0684).

### 19 *Outcome Measure*

20 The cost-effectiveness analysis assessed quality-adjusted symptom resolution over  
21 the 7 day trial duration and estimated median time to complete resolution of

---

<sup>1</sup> The trial initially recruited patients with no upper age limit and this was amended to age 70 after a serious adverse reaction (hospitalisation for pneumonia and subsequent death, in a patient receiving placebo). Patients over the age of 70 recruited previous to the protocol amendment were included in the ITT analysis.

1  
2  
3 1 symptoms and the corresponding utility gains measured by the EuroQol EQ-5D 5  
4  
5 2 level (EQ-5D-5L) index. These outcomes informed the construction of a quality-  
6  
7 3 adjusted life year (QALY) used in the cost-utility analysis. The EuroQol instrument  
8  
9 4 has five domains (mobility, self-care, activities, pain/discomfort, and  
10  
11 5 anxiety/depression) and five response levels ranging from no problems to severe  
12  
13 6 problem.<sup>12</sup> This health-related quality of life (HRQoL) instrument was administered to  
14  
15 7 all participants at baseline and completed on each day of the seven day patient  
16  
17 8 diary. Each of the five dimensions in the EQ-5D-5L version is scored from 1 (no  
18  
19 9 problem) to 5 (extreme problems), generating a profile (e.g. 11245) that can be used  
20  
21 10 to calculate a single index score (range -0.281 – 1.000).<sup>13</sup> The EQ-5D instrument  
22  
23 11 also generates a self-rating of HRQoL scored from 0 to 100 employing a visual  
24  
25 12 analogue scale (VAS); this was used in scenario analyses. Quality adjusted  
26  
27 13 symptom resolution at 24 and 48 hours were also reported.  
28  
29  
30  
31  
32  
33

### 34 15 *Resource Use*

35  
36  
37 16 Primary care resource utilisation was recorded in a trial patient diary for the first 7  
38  
39 17 days of the trial and was complemented by a follow-up survey sent to those with  
40  
41 18 incomplete patient diaries. A primary care patient medical record review for the  
42  
43 19 period from day 1 to day 28 (trial follow-up period) was also undertaken which  
44  
45 20 recorded primary and secondary care contacts related to sore throat including  
46  
47 21 serious adverse events (SAEs) related to the condition. SAEs included in the  
48  
49 22 analysis were those classified as such by the trial protocol; and detailed in the main  
50  
51 23 trial paper.<sup>11</sup> Resource use included the following: visits and telephone calls to the  
52  
53 24 GP; visits and telephone calls to nurses; out-of-hours calls and visits; pharmacy  
54  
55  
56  
57  
58  
59  
60

1 visits; calls to helpline '111'; A&E visits; hospitalisations; and various types of  
2 reported medication including prescribed antimicrobials and over-the-counter (OTC)  
3 medications.

#### 4 5 *Unit Costs*

6 Total and average costs were estimated for the intervention, antibiotic usage (up to  
7 and including day 7), OTC medication usage (for days 0-7), health resource  
8 use/medication across the trial period (for days 1-28), SAEs, and patient productivity  
9 losses associated with sick days reported (for work and education) and inability to  
10 carry out usual activities. Unit costs, presented in the **Online Appendix** (Table A1),  
11 were obtained from a number of sources including, PSSRU<sup>14</sup>, British National  
12 Formulary<sup>15</sup>, Boots Chemist<sup>16</sup>, and the NHS Electronic Tariff Database<sup>17</sup> and are  
13 reported in UK currency. Productivity losses were costed using average wage rates  
14 for those employed and minimum wage rates for students.<sup>18</sup> All cost estimates were  
15 reported in 2015 GBP using appropriate adjustments for prices retrieved where  
16 necessary.<sup>19</sup> Disaggregated average cost estimates reported were based on the full  
17 cohort in the ITT analysis assuming non-responders had zero costs.

#### 18 19 *Analysis*

20 Patient characteristics and reported resource use were summarised by trial arm. The  
21 primary economic analysis was conducted on an ITT basis and adopted the  
22 healthcare services payer perspective (HSP) which included the cost burden to the  
23 HSP only. Given the short-term duration of the trial, neither costs nor benefits were

1 discounted. For the HSP the prescription administrative charge, normally applied to  
2 employed, working-age adults only in the UK<sup>20</sup>, associated with the antimicrobial was  
3 not incorporated into the cost analysis as this was considered an out-of-pocket  
4 (OOP) expense borne by the patient; this was not considered as a contribution to the  
5 HSP either i.e. reducing the net cost of care per person to the HSP, as the  
6 prescription administrative charge is not applied to everyone and the full amount may  
7 not be recouped by the HSP.<sup>21</sup> In the scenario analyses, a societal costing  
8 perspective (SCP) was also adopted reflecting the overall economic burden of the  
9 dexamethasone relative to the placebo. This included productivity losses due to sick  
10 days i.e. reported time off due to missed work or education and reported inability to  
11 carry out usual activities, and OOP expenses. Further scenarios assessed sub-  
12 groups based on patient characteristics. The sub-group who highlighted they were  
13 current smokers at the time of the trial were assessed in a scenario analysis due to  
14 the extra healthcare burden smokers have relative to non-smokers.<sup>22</sup> Descriptions of  
15 all 20 analyses are presented in the **Online Appendix** (Table A2).

16 Each element of costs and outcomes were reported separately, consistent with a  
17 cost-consequence analysis; the resource use reported was for the full ITT cohort (i.e.  
18 no missing resource use data) and the HRQoL data reported in the disaggregated  
19 format was for complete cases i.e. n=337; 60% of the full cohort. Missing HRQoL  
20 data was assessed and classified as missing at random (MAR) (see **Online**  
21 **Appendix**- Figure A1).<sup>16</sup> Multiple imputation analysis was performed for missing  
22 outcome data (40%) in the ITT cohort using a number of imputations (n=60) greater  
23 than the proportion of missing data.<sup>23</sup> The range of covariates included in the  
24 multiple imputation analysis along with a more comprehensive presentation of  
25 methods is presented (see **Online Appendix**- Table A3). The trial and follow-up

1 duration was 28 days in total and for consistency it was assumed that HRQoL was  
2 unchanged from day 7 to day 28 using the last value brought forward technique.<sup>24</sup>  
3 The average utility from baseline reported across the 28 days, calculated using area  
4 under the curve (AUC) was considered 1/13th of a quality adjusted life year (QALY).  
5 Baseline variation in outcomes was adjusted for incorporating multiple regression  
6 and seemingly unrelated regression techniques which estimated the baseline  
7 imbalance taking into account costs and effects.<sup>16, 25</sup> QALYs exhibited a non-normal  
8 distribution (see **Online Appendix**- Figure A2) and bootstrapping techniques using  
9 1,000 iterations were applied in Microsoft Excel.<sup>26</sup> The differences in EQ-5D-5L from  
10 baseline (day 0) at each day i.e. days 1 to 7, were estimated and results from the  
11 complete case analysis (CCA) (n=337) and the intention-to-treat analysis (ITT)  
12 (n=565) are presented in the **Online Appendix** (Tables A4-A5). Cost-utility analysis  
13 was undertaken and incremental cost-effectiveness ratios (ICERs) were estimated  
14 and reported for the basecase analysis and all scenario analyses. ICERs were  
15 probabilistic for the basecase analysis and deterministic for the series of scenarios  
16 estimated. The analysis was undertaken in Stata version 14.1.<sup>27</sup> A cost-effectiveness  
17 plane and cost-effectiveness acceptability curve (CEAC) were constructed based on  
18 the bootstrapped sample means and net monetary benefit (NMB) was also assessed  
19 against a range of willingness to pay thresholds up to £100,000.<sup>28</sup> The NICE  
20 willingness to pay threshold of £20,000 was adopted as a decision rule to assess  
21 cost-effectiveness.<sup>27</sup>

## 22 **Results**

23  
24 The ITT cohort (n=565) with 288 in the dexamethasone group and 277 in the  
25 placebo group; descriptive statistics are presented in **Table 1**. The mean age of

1 participants was 37 years and 75% were women. There was no significant clinical  
2 difference in median time to complete symptom resolution across trial arms with both  
3 displaying complete symptom resolution by day 4; however, there was a significant  
4 difference in symptom resolution at 48 hours.<sup>11</sup> The changes in HRQoL over the 7  
5 days highlight larger differences at baseline and at 24 hours with the dexamethasone  
6 group reporting 2.9% and 2.5% higher utility scores, respectively (see **Online**  
7 **Appendix**- Figures A3-4). Differences start to diminish (<1.5%) from day 2 onwards.  
8 **Table 2** highlights the differences in estimated QALYs for the imputed ITT cohort.  
9 After controlling for the baseline imbalances in HRQoL, the impact of the intervention  
10 was negative but not statistically significant: the QALY gain was -0.00005 (95% CI: -  
11 0.0002; 0.00011) equivalent to a loss in HRQoL of a half hour for the  
12 dexamethasone relative to the placebo group. Unadjusted differences in HRQoL for  
13 the ITT and complete case cohorts are presented in the **Online Appendix** (see-  
14 Figures A4-5).

15 For the sub-group who received the delayed prescription based on clinical need, a  
16 statistically significant benefit was evidenced after baseline imbalances were  
17 adjusted for resulting in an approximate HRQoL gain of 13.6 hours relative to the  
18 control group. For the sub-group who did not receive the prescription, the  
19 dexamethasone group indicated a significant QALY loss of approximately 13 hours  
20 relative to the placebo group. For the patient group who reported that they were  
21 current smokers a significant QALY gain from the dexamethasone of 0.0029,  
22 equivalent to 1 day was evidenced. At 48 hours where a significant difference in the  
23 risk ratio of symptom resolution at 48 hours in favour of the dexamethasone [RR:  
24 1.31 (95% CI, 1.02 to 1.68; P = .03)] was observed, the significant QALY gain  
25 approximated to 3.7 hours for the current smokers sub-group.



1 The average cost per patient associated with the dexamethasone and placebo  
2 groups in the basecase analysis adopting a HSP was £73 and £69, respectively.  
3 **Table 3** highlights total costs for the categories included in the economic evaluation.  
4 Average costs were higher across both trial arms for the sub-group who did not  
5 receive the delayed prescription relative to the sub-group who did (£24 and £18  
6 higher in the placebo and dexamethasone groups respectively) driven by higher  
7 health service utilisation; however no statistically significant impact on costs across  
8 these sub-groups for the HSP was found. For the SCP, including the cost associated  
9 with inability to carry out usual activities (Scenario I), the average cost per patient  
10 was £126 and £134 for the dexamethasone and placebo groups, respectively. This  
11 suggests a cost-saving of £7 per patient to society. For the sub-group who received  
12 the delayed prescription there was a negligible SCP reduction in the dexamethasone  
13 group of -£0.18; however, for those who did not receive the delayed prescription the  
14 SCP reduction for the substantial at -£12 signalling strong evidence of cost-savings  
15 from the use of oral dexamethasone compared to placebo.

16 In the deterministic basecase analysis (**Table 4**), the ICER was negative at -£81,400  
17 due to the size and sign of the incremental effectiveness. In the basecase  
18 probabilistic analysis, the mean ICER was -£6,440 (95% CI: -£132,151; £126,335)  
19 and the median ICER was -£304 (IQR:-£5,816; £3,877); suggesting there is  
20 considerable uncertainty around this estimate. Several societal scenarios highlighted  
21 the potential for cost-savings; however, due to outcome variability, there is  
22 insufficient evidence to suggest the dexamethasone is cost-effective. The cost-  
23 effectiveness plane (**Figure 1**) presents a visual representation of the spread of the  
24 variation in cost and effect pairs for the basecase probabilistic analysis emphasizing  
25 the wide variation in effectiveness. Due to this uncertainty, the cost-effectiveness

1  
2  
3 1 acceptability curve (see **Online Appendix**- Figure A5), suggests the probability of  
4  
5 2 cost-effectiveness is 47.9% at a £20,000 willingness to pay threshold. The mean  
6  
7 3 NMB was £1.80 (SD: £351) at a £20,000 willingness to pay threshold with a 43.5%  
8  
9 4 probability of the dexamethasone yielding a net benefit.  
10  
11  
12  
13  
14  
15  
16  
17

## 18 7 **Discussion**

19  
20  
21  
22

23 9 The analysis undertaken provides the first detailed account of the cost of sore throat  
24  
25 10 in the UK estimating that on average, costs of treating sore throat to the healthcare  
26  
27 11 services payer are approximately £69 per patient and to society £134. With  
28  
29 12 approximately 340 million consultations annually in the UK<sup>29</sup> and one in ten due to  
30  
31 13 sore throat<sup>4</sup>, the economic burden is estimated at £2.35bn (or £4.56bn to society)  
32  
33 14 based on UK unit costs. The average cost difference was £4.07 (higher in the  
34  
35 15 dexamethasone group): the dexamethasone group cost differential was £5.04 i.e. the  
36  
37 16 cost to the HSP of the single dose of oral dexamethasone. Therefore from the HSP,  
38  
39 17 there is insufficient evidence to suggest the intervention is cost-effective and there is  
40  
41 18 some evidence to suggest the intervention may be producing a negative impact on  
42  
43 19 HRQoL across the whole cohort.  
44  
45  
46  
47  
48  
49  
50

### 51 21 *Strengths and limitations of the study*

52  
53

54 22 The study collected a wide range of demographic, clinical, quality of life and resource  
55  
56 23 use data using a trial-specific daily patient diary which permitted an extensive  
57  
58  
59  
60

1 exploration of uncertainty in scenario and sub-group analyses. Sub-group analysis  
2 indicated that for those who received the delayed antibiotic prescription and the  
3 dexamethasone versus those who received the delayed prescription and the  
4 placebo, the effect on HRQoL was positive and significant and therefore the resulting  
5 ICERs were cost-effective at £4,950 per QALY gain. In contrast the placebo sub-  
6 group not given the delayed prescription had a significantly negative effect. GPs  
7 selected patients who were perceived to be in greater clinical need for the delayed  
8 prescription sub-arm of the trial; as this sub-group may have had increased severity  
9 of symptoms relative to their counterparts, they had more scope to improve from a  
10 clinical and HRQoL perspective which in part may explain the variation in HRQoL for  
11 the sub-groups. Additionally the average costs of those in the 'no delayed  
12 prescription' sub-group who received intervention or placebo were 30% and 45%  
13 times higher, respectively, than those in the comparative sub-group who received the  
14 delayed prescription. Cost differences observed across sub-groups were primarily  
15 driven by higher reported health service use contacts across the trial and follow-up  
16 periods: 210% increase in the 'no delayed prescription' sub-groups overall and 157%  
17 and 286% higher for the intervention and placebo arms, respectively. Caution is  
18 needed in interpreting this variation as the trial was not powered for sub-group  
19 analysis of resource use and response rates were low. Previous research did not  
20 find any clinical differences across delayed prescription and no treatment  
21 strategies<sup>30</sup>; however our findings suggest that the clinical and non-clinical benefits  
22 of the delayed prescription in addition to the dexamethasone need to be explored  
23 further.

24 Although only a slight reduction in antibiotic usage was observed in the intervention  
25 arm relative to the placebo i.e. 3% less reported use for the delayed prescription

1 sub-group, we feel the range of budgetary, clinical and environmental benefits of  
2 reducing antibiotic usage need to be explored further given the evidence highlighted  
3 in this study.

4 When assessing the impact of the dexamethasone on those who reported being  
5 current smokers (n=103, equally distributed between trial arms), there was a  
6 significant increase in HRQoL from baseline suggestive of cost-effectiveness for  
7 smokers: ICER £6,533. Due to higher risk of prolonged symptoms compared to  
8 previous smokers or non-smokers, this intervention may provide an interactive anti-  
9 inflammatory perhaps akin to effects in patients with exacerbations of chronic  
10 obstructive pulmonary disease, primarily caused by smoking.

11 Adoption of a SCP highlighted cost-savings for the intervention relative to the control  
12 group. The main driver of difference in the range of scenarios adopting a SCP was  
13 the cost associated with missing work or education due to sickness. However, there  
14 were also differences in reported OTC medication usage across trial arms and sub-  
15 groups that may influence recovery.

16 The study is not without its limitations. Missing data was an issue as the main tool for  
17 data collection was a patient completed diary at each day of the trial follow-up:  
18 HRQoL over the 7 days was 60% complete and the resource use reported in diaries  
19 was 62% complete. The initial response rate was much lower and a protocol  
20 amendment which allowed the use of incentives for patients who returned diaries  
21 was introduced. Reported resource use for HSP analysis was cross-checked with a  
22 follow-up patient survey and medical record review and as such where no resource  
23 use was identified for each patient across the data sources, the assumption of zero  
24 resource use for that category is justifiable but potentially leading to some bias in

1  
2  
3 1 cost estimates. However, EQ-5D-5L data was collected from the patient survey only  
4  
5 2 and missing data was considerable at 40%. Although robust multiple imputation  
6  
7 3 techniques were applied to impute values, it is recognised that the range of  
8  
9 4 covariates used to impute missing data may not reflect the degree of heterogeneity  
10  
11 5 across the patient cohort and therefore some bias may remain in terms of the  
12  
13 6 resource use and outcomes reported versus those that were not. If the imputation  
14  
15 7 model was mis-specified the imputation estimates could have some degree of bias.<sup>31</sup>  
16  
17 8 Due to the high uncertainty around observed HRQoL estimates across both arms  
18  
19 9 however, the limitations associated with multiple imputation are not cause for  
20  
21 10 concern. In the analyses adopting a SCP, self-reported data on time unable to  
22  
23 11 engage in usual activities and OTC medications purchased were not imputed for  
24  
25 12 those with missing data and assumed zero for non-responders. The total cost burden  
26  
27 13 to society is more than likely underestimated as a result and the SCP cost difference  
28  
29 14 across both arms may not be as representative as the HCP cost difference.  
30  
31  
32  
33  
34 15 Further limitations include the interpretation of the sub-group analyses given the  
35  
36 16 small sample sizes and limitations of the data outlined. The findings based on the  
37  
38 17 sub-group analyses should be interpreted with caution and need to be assessed with  
39  
40 18 appropriately powered trials. However, the sub-group analyses give greater  
41  
42 19 understanding of the wide variation in outcomes observed.  
43  
44  
45  
46  
47  
48  
49  
50

### 21 *Conclusions and policy implications*

51 22 In conclusion, sore throat has a substantial economic burden on health care delivery  
52  
53 23 systems with this study estimating the economic burden from a HCP in the UK at  
54  
55 24 £2.35bn annually. More effective strategies for assessing and providing rapid  
56  
57  
58  
59  
60

1  
2  
3  
4  
5  
6  
7  
8  
9  
10  
11  
12  
13  
14  
15  
16  
17  
18  
19  
20  
21  
22  
23  
24  
25  
26  
27  
28  
29  
30  
31  
32  
33  
34  
35  
36  
37  
38  
39  
40  
41  
42  
43  
44  
45  
46  
47  
48  
49  
50  
51  
52  
53  
54  
55  
56  
57  
58  
59  
60

1 symptom relief could reduce the cost burden as well as improve clinical and HRQoL  
2 outcomes. The findings of this study suggest there is considerable uncertainty in  
3 relation to the effectiveness and HRQoL benefit of dexamethasone for sore throat  
4 and therefore insufficient evidence to suggest cost-effectiveness or its adoption as a  
5 viable treatment strategy. However, there was evidence suggestive of potential  
6 benefits in several sub-groups which could be investigated further in follow-up trials.

For peer review only

### 15 **Acknowledgements**

16 The authors would like to acknowledge the full TOAST study team for their input:

17 Voysey M<sup>1</sup>, Cook J<sup>1</sup>, Allen J<sup>1</sup>, Harman K.<sup>2</sup>

18 1) Nuffield Department of Primary Care Health Sciences, University of Oxford

19 2) Department of Medicine, University of Southampton

21 Funding:

1 This paper presents independent research funded by the National Institute for Health  
2 Research School for Primary Care Research (Project number 172). The views  
3 expressed are those of the authors and not necessarily those of the NIHR, the NHS  
4 or the Department of Health.

#### 5 6 Data Sharing:

7 There is no additional data available for this study.

#### 8 9 Competing Interests:

10 We have read and understood BMJ Open policy on declaration of interests and  
11 declare that we have no competing interests

12 The Corresponding Author has the right to grant on behalf of all authors and does  
13 grant on behalf of all authors, a worldwide licence to the Publishers and its licensees  
14 in perpetuity, in all forms, formats and media (whether known now or created in the  
15 future), to i) publish, reproduce, distribute, display and store the Contribution, ii)  
16 translate the Contribution into other languages, create adaptations, reprints, include  
17 within collections and create summaries, extracts and/or, abstracts of the  
18 Contribution, iii) create any other derivative work(s) based on the Contribution, iv) to  
19 exploit all subsidiary rights in the Contribution, v) the inclusion of electronic links from  
20 the Contribution to third party material where-ever it may be located; and, vi) licence  
21 any third party to do any or all of the above.

#### 22 23 Protocol and Ethics:

24 The protocol, informed consent form, participant information sheet and any proposed  
25 advertising material have received appropriate Research Ethics Committee (REC),  
26 regulatory authorities (MHRA in the UK), and host institution(s) approval (REC  
27 reference: 12/SC/0684 NRES Committee South Central - Oxford B).

28

1  
2  
3 1 Contribution Statement:  
4

5 2 All authors contributed to: the conception and design of the TOAST trial analysis  
6 3 including guidance on the health economic evaluation; the drafting and revising of  
7 4 this manuscript; approval of the final version of the manuscript and are accountable  
8 5 for all aspects of the work presented.  
9  
10

11  
12 6 Each author has particular areas of expertise as follows: applied economic  
13 7 evaluation leads – RB & JW (joint first authors), statistical analysis SJ, NW & RP,  
14 8 project management, project conception, design and clinical lead- GH, clinical  
15 9 leadership and guidance, interpretation and policy interpretation- AH, MT, CH, PL,  
16 10 MM.  
17  
18  
19  
20  
21

22 11

23  
24 12

25  
26 13 This research presents an honest, accurate, and transparent account of the  
27 14 economic evaluation of the TOAST UK study; no relevant aspects of the study have  
28 15 been omitted and the wide range of scenario analyses addresses both the clinical  
29 16 heterogeneity and variability in structural assumptions.  
30  
31  
32  
33  
34  
35  
36  
37  
38  
39  
40  
41  
42  
43  
44  
45  
46  
47  
48  
49  
50  
51  
52  
53  
54  
55  
56  
57  
58  
59  
60



1  
2  
3 **FIGURES AND TABLES**  
4  
5

6  
7 **Figure 1: Cost-effectiveness plane**  
8  
9  
10  
11  
12  
13  
14  
15  
16  
17  
18  
19  
20  
21  
22  
23  
24  
25  
26  
27  
28  
29  
30  
31  
32  
33  
34  
35  
36  
37  
38  
39  
40  
41  
42  
43  
44  
45  
46  
47  
48  
49  
50  
51  
52  
53  
54  
55  
56  
57  
58  
59  
60

For peer review only

**Table1: TOAST trial patient characteristics**

|                                                                 | Placebo Group       | Dexamethasone Group |
|-----------------------------------------------------------------|---------------------|---------------------|
| <b>All Eligible Participants (ITT)</b>                          | <b>277 (49%)</b>    | <b>288 (51%)</b>    |
| Male                                                            | 73 (13%)            | 67 (12%)            |
| Female                                                          | 204 (36%)           | 221 (39%)           |
| Mean Age <sup>a</sup>                                           | 37.3<br>(SD: 14.30) | 37.2<br>(SD: 14.36) |
| Current Smoker                                                  | 51 (9%)             | 52 (9%)             |
| <b>ANTIBIOTIC DETAILS<sup>b</sup></b>                           |                     |                     |
| Given Delayed Prescription                                      | 108 (19%)           | 115 (20%)           |
| Reported taking antibiotics                                     | 42 (7%)             | 34 (6%)             |
| Not Given Delayed Prescription                                  | 169 (30%)           | 173 (31%)           |
| Reported taking antibiotics                                     | 16 (3%)             | 16 (3%)             |
| Total reported antibiotics usage                                | 58 (10%)            | 50 (9%)             |
| <b>RESOURCE USE</b>                                             |                     |                     |
| Reported using OTC Meds (days 1-7)                              | 178 (32%)           | 173 (31%)           |
| Reported Resource Use (days 1-7)                                | 69 (12%)            | 67 (12%)            |
| Reported Resource Use in Follow-Up (days 8- 28)                 | 20 (4%)             | 30 (5%)             |
| SAE <sup>c</sup>                                                | 1 (<1%)             | 1 (<1%)             |
| Other AE                                                        | 1 (<1%)             | 0 (0%)              |
| <b>EMPLOYMENT STATUS/ SICK DAYS</b>                             |                     |                     |
| Reported Working Full-Time (22 years and over)                  | 149 (26%)           | 145 (26%)           |
| Reported Working Part-Time (22 years and over)                  | 40 (7%)             | 39 (7%)             |
| Assumed in FT/ PT Education <sup>d</sup> (18-22 years)          | 28 (5%)             | 33 (6%)             |
| Unemployed                                                      | 60 (11%)            | 71 (13%)            |
| Sick Days- Proportion Reporting >1 hr Missing (days 0-7)        | 104 (18%)           | 89 (16%)            |
| Sick Days- Proportion Reporting >1 hr Missing (days 1-7)        | 72 (13%)            | 60 (11%)            |
| Usual Activities- Proportion Reporting >1 hr Missing (days 0-7) | 137 (24%)           | 127 (22%)           |
| Usual Activities- Proportion Reporting >1 hr Missing (days 1-7) | 98 (17%)            | 104 (18%)           |

NOTES: Percentages in brackets represent proportion of full trial cohort (n=565)

a. Mean age was estimated using the ITT population previous to the amendment to inclusion criteria constricting the upper age limit to 70 years. 14 patients were over 70 years evenly distributed across both arms.

1  
2  
3 *b. Antibiotics reported for 'sore throat' are included if prescribed within the 7 day trial period and were*  
4 *administered outside a secondary care setting. This deviates slightly from the clinical paper analysis*  
5 *classification of overall antibiotic use which included antibiotics administered in secondary care for one patient*  
6 *in the control group.*

7  
8 *c. SAE's included were categorised as 'Suspected Serious Adverse Reaction' in the clinical paper. Although 3*  
9 *such events were reported, one was linked to a further SAE ultimately resulting in death and so was excluded*  
10 *from the economic analysis.*

11 *d. Those aged 18-21 years reporting 'yes' to FT/ PT work/education question in the baseline survey were all*  
12 *categorised into education for purposes of costing productivity losses in a scenario. (See Online Appendix)*  
13  
14  
15  
16  
17  
18  
19  
20  
21  
22  
23  
24  
25  
26  
27  
28  
29  
30  
31  
32  
33  
34  
35  
36  
37  
38  
39  
40  
41  
42  
43  
44  
45  
46  
47  
48  
49  
50  
51  
52  
53  
54  
55  
56  
57  
58  
59  
60

**Table 2: Quality-adjusted life year (QALY) analysis**

|                                                                                                    | <b>Placebo<br/>(n=277*)<br/>Mean (SE)</b> | <b>Dexamethasone<br/>(n=288*)<br/>Mean (SE)</b> | <b>Difference<br/>(Dexamethasone<br/>- Placebo)</b> | <b>P Value</b> |
|----------------------------------------------------------------------------------------------------|-------------------------------------------|-------------------------------------------------|-----------------------------------------------------|----------------|
| Imputed unadjusted QALYS                                                                           | 0.07165<br>(0.0006)                       | 0.07199<br>(0.0005)                             | 0.00034<br>(0.0009)                                 | P < 0.000      |
| Imputed QALYs, adjusted for baseline differences                                                   | 0.07672<br>(0.0004)                       | 0.07677<br>(0.0005)                             | -0.00005<br>(0.00008)                               | P = 0.522      |
| Imputed QALYs for those given delayed prescription (adjusted)                                      | 0.0743<br>(0.0005)                        | 0.0759<br>(0.0006)                              | 0.00155<br>(0.0001)                                 | P < 0.000      |
| Imputed QALYs for those not given a delayed prescription (adjusted)                                | 0.0785<br>(0.0005)                        | 0.0770<br>(0.0007)                              | -0.00149<br>(0.0001)                                | P < 0.000      |
| Imputed QALYs with patients removed who experienced SAE or AE (adjusted) (n=562)                   | 0.0768<br>(0.0004)                        | 0.0767<br>(0.0005)                              | -0.00006<br>(0.00008)                               | P = 0.473      |
| Imputed QALYs with patients removed who were over 70 years (adjusted) (n=551)                      | 0.0766<br>(0.0004)                        | 0.0765<br>(0.0005)                              | -0.000123<br>(0.00008)                              | P = 0.128      |
| Imputed QALYs with patients who were current smokers only (adjusted) (n=103)                       | 0.0738<br>(0.0008)                        | 0.0768<br>(0.0010)                              | 0.00294<br>(0.00018)                                | P < 0.000      |
| Imputed QALYs at 24 hours, adjusted for baseline differences                                       | 0.00270<br>(0.000008)                     | 0.00271<br>(0.000010)                           | 0.00001<br>(0.000002)                               | P < 0.000      |
| Imputed QALYs at 48 hours, adjusted for baseline differences in HRQoL                              | 0.00535<br>(0.000025)                     | 0.00538<br>(0.000031)                           | 0.00003<br>(0.000005)                               | P < 0.000      |
| Imputed QALYs at 48 hours, adjusted for baseline differences in HRQoL and RR of symptom resolution | 0.00492<br>(0.000024)                     | 0.00534<br>(0.000029)                           | 0.000422<br>(0.000005)                              | P < 0.000      |

\*This sample size is based on 60 imputed data sets. SE: standard error.

**Table 3: Cost analysis**

| Cost Bundle Category                       | Description                                                                                                          | Total Cost 2015 USD |                |               | Average Cost 2015 USD |                |               |
|--------------------------------------------|----------------------------------------------------------------------------------------------------------------------|---------------------|----------------|---------------|-----------------------|----------------|---------------|
|                                            |                                                                                                                      | Placebo             | Dexa-methasone | (Dex-Placebo) | Placebo               | Dexa-methasone | (Dex-Placebo) |
| Intervention                               | Cost associated with the intervention.                                                                               | £12,188             | £14,124        | £1,936        | £44                   | £49.04         | £5.04         |
| Antibiotics-Cohort A                       | Cost associated with antibiotics reported in patient survey, follow-up survey and medical records                    | £164                | £138           | -£26          | £1                    | £0.48          | -£0.11        |
| Antibiotics-Cohort B                       | Cost associated with antibiotics reported in patient survey and medical records only.                                | £154                | £128           | -£26          | £1                    | £0.44          | -£0.11        |
| Antibiotics-Societal                       | Cost associated with antibiotics inclusive of the patient co-payment for prescriptions.                              | £689                | £581           | -£108         | £2                    | £2.02          | -£0.47        |
| Antibiotics B-Societal                     | Cost associated with antibiotics inclusive of the patient co-payment for prescriptions for Cohort B.                 | £646                | £538           | -£108         | £2                    | £1.87          | -£0.46        |
| Antibiotics-Societal for Workers           | Cost associated with antibiotics inclusive of the patient co-payment for prescriptions for workers only.             | £623                | £474           | -£149         | £2                    | £1.65          | -£0.60        |
| Antibiotics B-Societal for Workers         | Cost associated with antibiotics inclusive of the patient co-payment for prescriptions for workers only in Cohort B. | £547                | £431           | -£116         | £2                    | £1.50          | -£0.48        |
| Over-the-counter (OTC)                     | Cost associated with reported OTC in the patient diary and follow-up survey.                                         | £668                | £648           | -£20          | £2                    | £2.25          | -£0.16        |
| Resource Use-Patient Diary                 | Cost associated with resource use reported in the patient diary.                                                     | £2,639              | £2,732         | £93           | £10                   | £9.49          | -£0.04        |
| Resource Use-Follow-up Survey              | Cost associated with resource use reported in the follow-up survey.                                                  | £4,082              | £4,008         | -£74          | £15                   | £13.92         | -£0.82        |
| Productivity Losses- Day 0-7 and Follow-up | Cost of missed days due to illness reported in the                                                                   | £22,668             | £19,469        | -£3,199       | £82                   | £67.60         | -£14.23       |

|                                                        |                                                                                                                                        |         |           |         |         |         |         |
|--------------------------------------------------------|----------------------------------------------------------------------------------------------------------------------------------------|---------|-----------|---------|---------|---------|---------|
|                                                        | patient diary and follow-up survey.                                                                                                    |         |           |         |         |         |         |
| Productivity Losses (B)- Day 0-7 and Follow-up         | Cost of missed days due to illness assuming all 18-21 year olds were in education.                                                     | £21,505 | £18,634   | -£2,871 | £78     | £64.70  | -£12.93 |
| Productivity Losses- Day 1-7 and Follow-up             | Cost of missed days due to illness reported in the patient diary from day 1 and follow-up survey.                                      | £14,846 | £12,699   | -£2,147 | £54     | £44.09  | -£9.50  |
| Productivity Losses (B)- Day 1-7 and Follow-up         | Cost of missed days due to illness (from day 1) assuming all 18-21 year olds were in education.                                        | £14,176 | £12,140   | -£2,036 | £51     | £42.15  | -£9.02  |
| Usual Activities- Day 0-7 and Follow-up                | Cost associated with missing time due to illness for usual activities reported in the patient diary and follow-up survey.              | £4,904  | £5,052    | £148    | £18     | £17.54  | -£0.16  |
| Usual Activities- Day 1-7 and Follow-up                | Cost associated with missing time due to illness (from day 1) for usual activities reported in the patient diary and follow-up survey. | £3,444  | £3,672    | £228    | £12     | £12.75  | £0.32   |
|                                                        |                                                                                                                                        |         |           |         |         |         |         |
| Total HSP Costs- Primary Analysis                      |                                                                                                                                        | £19,073 | £21,002   | £1,929  | £68.86  | £72.92  | £4.07   |
| Total HSP Costs- without SAE's/ AEs (n=562) Option (A) |                                                                                                                                        | £15,610 | £18,349   | £2,739  | £56.76  | £63.93  | £7.17   |
| Total HSP Costs- Delayed Prescription                  |                                                                                                                                        | £5,830  | £7,119.00 | £1,289  | £53.99  | £61.90  | £7.91   |
| Total HSP Costs- No Delayed Prescription               |                                                                                                                                        | £13,243 | £13,883   | £640    | £78.36  | £80.25  | £1.89   |
| Total HSP Costs- Smokers Only (n=103)                  |                                                                                                                                        | £6,059  | £2,787    | -£3,272 | £118.81 | £53.60  | -£65.21 |
| Total SCP Option (I)                                   |                                                                                                                                        | £37,076 | £36,409   | -£667   | £133.85 | £126.42 | -£7.43  |
| Total SCP without SAE's/ AEs (n=562)                   |                                                                                                                                        | £33,012 | £33,726   | -£667   | £120.04 | £117.51 | -£2.53  |

|                                   |  |         |         |         |         |         |          |
|-----------------------------------|--|---------|---------|---------|---------|---------|----------|
| Total SCP-Delayed Prescription    |  | £12,995 | £13,816 | £821    | £120.32 | £120.14 | -£0.18   |
| Total SCP-No Delayed Prescription |  | £24,081 | £22,593 | -£1,488 | £142.49 | £130.59 | -£11.90  |
| Total SCP-Smokers Only (n=103)    |  | £8,739  | £3,259  | -£5,480 | £171.35 | £62.68  | -£108.67 |

*NOTE: Cohort A has an additional 8 patients included who reported antibiotic use in follow-up surveys only.*

*Cohort B does not include these patients in keeping with the statistical analysis plan outlined for the clinical analysis.*

For peer review only

Table 4: Cost-utility analysis (deterministic models)

| <i>Scenarios<sup>a</sup></i>                        | <i>Control</i> | <i>Intervention</i> | $\Delta$ in Cost | $\Delta$ in Effect <sup>b</sup> | ICER      | Interpretation <sup>c</sup>             |
|-----------------------------------------------------|----------------|---------------------|------------------|---------------------------------|-----------|-----------------------------------------|
| <b><i>Healthcare Services Payer Perspective</i></b> |                |                     |                  |                                 |           |                                         |
| <b><i>Basecase</i></b>                              | £68.86         | £72.92              | £4.07            | -0.00005                        | -£81,400  | <i>Not cost-effective</i>               |
| <b><i>Scenario A</i></b>                            | £56.76         | £63.93              | £7.17            | -0.00010                        | -£71,700  | <i>Not cost-effective</i>               |
| <b><i>Scenario B</i></b>                            | £69.22         | £73.37              | £4.15            | -0.00012                        | -£33,850  | <i>Not cost-effective</i>               |
| <b><i>Scenario C</i></b>                            | £53.99         | £61.90              | £7.92            | 0.00160                         | £4,950    | <i>Cost-effective</i>                   |
| <b><i>Scenario D</i></b>                            | £78.36         | £80.25              | £1.89            | -0.0015                         | -£1,260   | <i>Not cost-effective</i>               |
| <b><i>Scenario E</i></b>                            | £57.58         | £77.18              | £19.60           | 0.0030                          | £6,533    | <i>Cost-effective</i>                   |
| <b><i>Scenario F</i></b>                            | £68.86         | £72.92              | £4.07            | 0.00001                         | £407,000  | <i>Not cost-effective</i>               |
| <b><i>Scenario G</i></b>                            | £68.86         | £72.92              | £4.07            | 0.00042                         | £9,690    | <i>Cost-effective</i>                   |
| <b><i>Scenario H<sup>d</sup></i></b>                | £68.86         | £72.92              | £4.07            | -0.0038                         | -£1,071   | <i>Not cost-effective</i>               |
| <b><i>Societal Cost Perspective</i></b>             |                |                     |                  |                                 |           |                                         |
| <b><i>Scenario I</i></b>                            | £133.85        | £126.42             | -£7.43           | -0.00005                        | £148,600  | <i>Not cost-effective</i>               |
| <b><i>Scenario J</i></b>                            | £167.36        | 154.72              | -£12.64          | -0.00005                        | £252,800  | <i>Not cost-effective</i>               |
| <b><i>Scenario K</i></b>                            | £120.04        | £117.51             | -£2.53           | -0.00010                        | £25,300   | <i>Not cost-effective</i>               |
| <b><i>Scenario L</i></b>                            | £135.51        | £127.59             | -£7.92           | -0.00005                        | £158,400  | <i>Not cost-effective</i>               |
| <b><i>Scenario M</i></b>                            | £135.23        | £127.44             | -£7.79           | -0.00005                        | £155,800  | <i>Not cost-effective</i>               |
| <b><i>Scenario N</i></b>                            | £120.32        | £120.14             | -£0.18           | 0.00160                         | -£112     | <i>Cost-effective &amp; Cost-saving</i> |
| <b><i>Scenario O</i></b>                            | £142.49        | £130.59             | -£11.90          | -0.00150                        | £7,933    | <i>Not cost-effective</i>               |
| <b><i>Scenario P</i></b>                            | £171.35        | £62.68              | -£108.67         | 0.0030                          | -£36,223  | <i>Cost-effective &amp; Cost-saving</i> |
| <b><i>Scenario Q</i></b>                            | £133.85        | £126.42             | -£7.43           | 0.00001                         | -£743,000 | <i>Cost-effective &amp; Cost-saving</i> |
| <b><i>Scenario R</i></b>                            | £133.85        | £126.42             | -£7.43           | 0.00042                         | -£17,690  | <i>Cost-effective &amp; Cost-saving</i> |
| <b><i>Scenario S<sup>d</sup></i></b>                | £133.85        | £126.42             | -£7.43           | -0.0038                         | £1,955    | <i>Not cost-effective</i>               |

## NOTES:

a. Full scenario details are presented in the supplementary file.



1  
2  
3 *b. Changes in effect have been adjusted for baseline differences for each model and are representative of an*  
4 *annual timeframe (see Table 2 for more details).*

5 *c. Not cost-effective is suggested if the effect is negative and therefore the ICER is negative; not cost-effective*  
6 *may also be suggested when the ICER is positive due to both a negative cost and effect i.e. positioned in the*  
7 *South-West quadrant of the cost-effectiveness plane, depending on the WTP threshold. As the stated WTP*  
8 *threshold is £20,000 per QALY gain, all positive ICERs due to positive costs and effects that are over £20,000 are*  
9 *also deemed not cost-effective. Also note that confidence intervals were not reported as the analysis are*  
10 *deterministic and non-linear; therefore confidence intervals could not be meaningfully interpreted.*

11 *d. Average unadjusted EQ-VAS scores across baseline to day 7 are presented in the online appendix. After*  
12 *adjustments for imbalance at baseline, the incremental effect was negative at -0.174 at day 7. The change in*  
13 *effect presented in the table above has been adjusted to represent an annual timeframe consistent with cost*  
14 *per QALY interpretation.*

15  
16  
17  
18  
19  
20  
21  
22  
23  
24  
25  
26  
27  
28  
29  
30  
31  
32  
33  
34  
35  
36  
37  
38  
39  
40  
41  
42  
43  
44  
45  
46  
47  
48  
49  
50  
51  
52  
53  
54  
55  
56  
57  
58  
59  
60

For peer review only

## REFERENCES

- 1 Roos K, Claesson R, Persson U, Odegaard K. The economic cost of a streptococcal tonsillitis episode Scandinavian Journal of Primary Healthcare 1995 13: 257-260
- 2 HMSO Morbidity Statistics in General practice : Fourth national Study HMSO 1994
- 3 Gulliford M, Latinovic R, Charlton J, Little P, van Staa T, Ashworth M. Selective decrease in consultations and antibiotics prescribing for acute respiratory tract infection in UK primary care up to 2006. Journal of Public Health 2009; 31(4), 512-520
- 4 Del Mar CB, Glasziou PP, Spinks AB. Antibiotics for sore throat. Cochrane Database Systematic Reviews 2006; (4):CD000023.
- 5 NICE guideline. Respiratory Tract Infections - antibiotic prescribing. Prescribing of antibiotics for self-limiting respiratory tract infections in adults and children in primary care. 2008. National Institute for Clinical Excellence. Ref Type: Report.
- 6 Centers for Disease Control and Prevention. Get Smart: Know When Antibiotics Work in Doctor's Offices: Adult Treatment Recommendations. <https://www.cdc.gov/getsmart/community/for-hcp/outpatient-hcp/adult-treatment-rec.html> last updated: March 2016. Accessed June 19, 2017
- 7 Guilliford MC, Dregan A, Moore M et al. Continued high rates of antibiotic prescribing to adults with respiratory tract infection: survey of 568 UK general practices. BMJ Open 2014; 4(10)
- 8 Hayward G, Thompson M, Heneghan C, Perera R, Del Mar C, Glasziou P. Corticosteroids for pain relief in sore throat: systematic review and meta-analysis. BMJ 2009; 339:b2976
- 9 Costelloe C, Metcalfe C, Lovering A, Mant D, Hay AD. Effect of antibiotic prescribing in primary care on antimicrobial resistance in individual patients: systematic review and meta-analysis. *BMJ*. 2010;340(May18\_2):c2096
- 10 Cook J, Hayward G, Thompson M, et al. Oral corticosteroid use for clinical and cost-effective symptom relief of sore throat: study protocol for a randomized controlled trial. *Trials* 2014; 15, 365

DOI: 10.1186/1745-6215-15-365

<sup>11</sup> Hayward G, Hay A, Moore M. et al. Effect of Oral Dexamethasone Without Immediate Antibiotics vs Placebo on Acute Sore Throat in Adults A Randomized Clinical Trial. JAMA 2017; 317(15):1535-1543. doi:10.1001/jama.2017.3417

<sup>12</sup> Devlin N, Krabbe P. "The development of new research methods for the valuation of EQ-5D-5L." European Journal of Health Economics 2013; 14(1): S1-S3

<sup>13</sup> Devlin N, et al 2016 Valuing Health-Related Quality of Life: An EQ-5D-5L Value Set for England. Office of Health Economics research paper 16/01

<sup>14</sup> PSSRU "Unit Costs of Health and Social Care 2015"

<http://www.pssru.ac.uk/project-pages/unit-costs/2015/>

<sup>15</sup> British National Formulary (2015)

<https://www.medicinescomplete.com/mc/bnf/current/>

<sup>16</sup> Boots Online Pharmacy (2015) [www.boots.com](http://www.boots.com)

<sup>17</sup> Department of Health Reference Cost 2014/2015; London 2015

<sup>18</sup> Office of National Statistics. Annual Survey of Hours and Earnings, 2014.

[www.ons.gov.uk](http://www.ons.gov.uk) Accessed June 6, 2017

<sup>19</sup> Office of National Statistics. Consumer Price Inflation Index. [www.ons.gov.uk](http://www.ons.gov.uk) Accessed June 6, 2017

<sup>20</sup> Pharmaceutical Services Negotiating Committee. Exemptions from the prescription charge. <http://psnc.org.uk/dispensing-supply/receiving-a-prescription/patient-charges/exemptions/> Accessed June 9, 2017

<sup>21</sup> NHS Choices. NHS in England- help with health costs.

<http://www.nhs.uk/NHSEngland/Healthcosts/Pages/Prescriptioncosts.aspx> Accessed June 6, 2017

<sup>22</sup> Wacker M, Holle R, Heinrich J, et al. The association of smoking status with healthcare utilisation, productivity loss and resulting costs: results from the population-based KORA F4 study. BMC Health Services Research 2013; 13:278

<sup>23</sup> Faria R, Gomes M, Epstein D, et al. A Guide to Handling Missing Data in Cost-Effectiveness Analysis Conducted Within Randomised Controlled Trials. Pharmacoeconomics 2014; 32(12):1157-70.

<sup>24</sup> Hunter R, Baio G, Butt T, Morris S, Round J, Freemantle N. An Educational Review of the Statistical Issues in Analysing Utility Data for Cost-Utility Analysis. Pharmacoeconomics 2015; 33(4): 355-366

- 
- 1  
2  
3  
4 <sup>25</sup> Manca A, Hawkins N, Sculpher MJ. Estimating mean QALYs in trial-based cost-  
5 effectiveness analysis: the importance of controlling for baseline utility. *Health*  
6 *Economics* 2005; 14(5):487-96.  
7  
8 <sup>26</sup> Glick HA, Doshi JA, Sonnad SS, Polsky D. *Economic Evaluation in Clinical*  
9 *Trials*. Handbooks in Health Economics, Volume 2. Oxford: Oxford University Press,  
10 2015  
11  
12 <sup>27</sup> StataCorp. *Stata Statistical Software: Release 14*. 14.1 ed. College Station, TX:  
13 StataCorp LP. ; 2015.  
14  
15 <sup>28</sup> NICE. *Guide to methods of technology appraisal*. Manchester, 2013  
16  
17 <sup>29</sup> British Medical Association (BMA). *General Practice in the UK – background*  
18 *briefing*. April 2017 [https://www.bma.org.uk/-/media/files/pdfs/.../general-](https://www.bma.org.uk/-/media/files/pdfs/.../general-practice.pdf?la=en)  
19 [practice.pdf?la=en](https://www.bma.org.uk/-/media/files/pdfs/.../general-practice.pdf?la=en) Accessed June 19, 2017  
20  
21  
22 <sup>30</sup> Little P, Moore M, Leydon G, Mullee M and Stuart B. Delayed antibiotic  
23 *prescribing strategies for respiratory tract infections in primary care: pragmatic,*  
24 *factorial, randomised controlled trial*. *BMJ* 2014; 348:g1606  
25  
26  
27  
28 <sup>31</sup> Horton NJ and Kleinman KP. Much ado about nothing: A comparison of missing  
29 *data methods and software to fit incomplete data regression models*. *Am Stat* 2017;  
30 61(1): 79-90  
31  
32  
33  
34  
35  
36  
37  
38  
39  
40  
41  
42  
43  
44  
45  
46  
47  
48  
49  
50  
51  
52  
53  
54  
55  
56  
57  
58  
59  
60

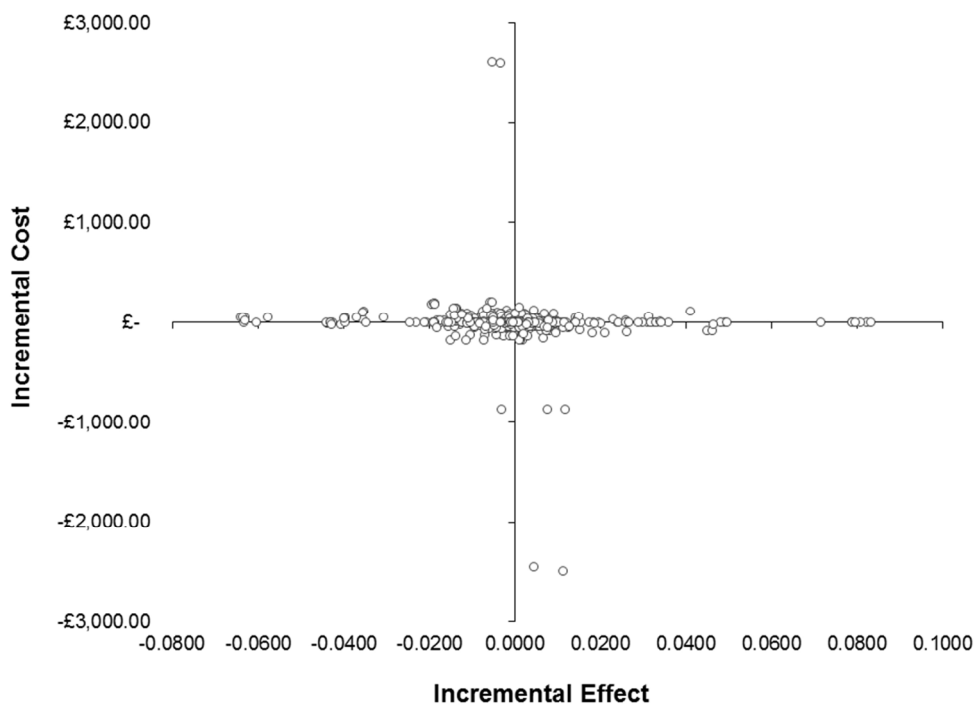

Figure 1: Cost-effectiveness plane

## TOAST ONLINE APPENDIX

Table A1- Trial Resource Use Costs

| TOAST TRIAL UNIT COSTS (2015 £) |                                                   |          |                              |                                                  |
|---------------------------------|---------------------------------------------------|----------|------------------------------|--------------------------------------------------|
| Cost ID                         | Cost Description                                  | 2015 (£) | Measure                      | Details                                          |
| Int1                            | Oral Steroid                                      | £ 5.04   | 1 dose                       | single 10mg dose of oral dexamethasone, BNF 2015 |
| Int2                            | GP Visit                                          | £ 44.00  | 11.7 minute consult          | PSSRU 2015                                       |
| Int3                            | Pharmacist                                        | £ 6.00   | 5 minute consult             | British National Formulary (BNF) 2015            |
| Anti1                           | Penicillin                                        | £ 0.04   | per 250mg tab                | BNF 2015                                         |
| Anti2                           | Erythromycin                                      | £ 0.04   | per 250mg tab                | BNF 2015                                         |
| Anti3                           | Clarithromycin                                    | £ 0.21   | per 500mg tab                | BNF 2015                                         |
| Anti4                           | Amoxicillin                                       | £ 0.08   | per 500mg tab                | BNF 2015                                         |
| Anti5                           | Coamoxiclav                                       | £ 0.20   | per 500mg tab                | BNF 2015                                         |
| Anti6                           | Doxycycline                                       | £ 0.14   | per 500mg tab                | BNF 2015                                         |
| Otc1                            | Paracetamol                                       | £ 0.24   | per recommended daily dose   | Boots Pharmacy Generic Brand, 2015               |
| Otc2                            | Ibuprofen (NSAIDS)                                | £ 0.60   | per recommended daily dose   | Boots Pharmacy Generic Brand, 2015               |
| Otc3                            | Anaesthetic spray                                 | £ 1.25   | per recommended daily dose   | Boots Pharmacy Generic Brand, 2015               |
| Otc4                            | Anaesthetic lozenges                              | £ 1.40   | per recommended daily dose   | Boots Pharmacy Generic Brand, 2015               |
| Otc5                            | Decongestant                                      | £ 1.00   | per recommended daily dose   | Boots Pharmacy Generic Brand, 2015               |
| Otc6                            | Lozenges (non-analgesic)                          | £ 0.66   | per recommended daily dose   | Boots Pharmacy Generic Brand, 2015               |
| Otc7                            | Other analgesia (cocodamol/ cough medicine, etc.) | £ 1.05   | per recommended daily dose   | Boots Pharmacy Generic Brand, 2015               |
| Wage1                           | Cost of an adult working day                      | £ 119.37 | median gross annual earnings | Office of National Statistics (UK)               |
| Wage2                           | Minimum wage day rate                             | £ 53.60  | October 2015 value           | Office of National Statistics (UK)               |
| Admin1                          | NHS prescription charge                           | £ 8.20   |                              | National Health Service (UK)-(NHS)               |
| Res1                            | GP Nurse                                          | £ 14.47  | 15.5 minute consult          | PSSRU 2015                                       |
| Res2                            | GP Telephone Call                                 | £ 27.00  | 7.1 minute call              | PSSRU 2015                                       |
| Res3                            | Out-of-Hours GP Clinic                            | £ 69.53  |                              | NAO.org                                          |
| Res4                            | 111 Telephone Advice                              | £ 8.14   |                              | Micro-costing study, University of Sheffield     |
| Res5                            | A&E                                               | £ 140.59 | Average weighted cost        | NHS Ref Costs 2015                               |
| Res6                            | Hospital Bed Day – average                        | £ 613.63 | Average weighted cost        | NHS Ref Costs 2015                               |
| Pres1                           | Codeine (co-codamol 30/500)                       | £ 0.06   | per tablet                   | BNF 2015                                         |
| Pres2                           | Codeine Linctus                                   | £ 0.16   | 15mg/ 5 ml                   | BNF 2015                                         |
| Pres3                           | Benzylamine (Diffiam Oromucosal Spray)            | £ 1.41   | 0.15% Spray/ 1 ml            | BNF 2015                                         |
| Pres4                           | Benzyl Penicillin & Metronidazole IV              | £ 12.24  | Daily dose (TBC)             | BNF 2015                                         |

**Table A2- Summary of Economic Analysis Scenarios**

| Options         | Perspective | Details                                                                                                                                                                                                                                                                       |
|-----------------|-------------|-------------------------------------------------------------------------------------------------------------------------------------------------------------------------------------------------------------------------------------------------------------------------------|
| <b>Basecase</b> | HSP         | The basecase scenario included the net cost of the intervention i.e. the cost of the once-off medication, the cost of antibiotics used and the cost of resource use reported including serious adverse events. The adjusted QALY estimate was adopted as the outcome measure. |
| <b>A</b>        | HSP         | Basecase was adjusted to remove effects and costs of serious adverse events (one in each arm) and adverse events (one in the control group) (n=562).                                                                                                                          |
| <b>B</b>        | HSP         | Basecase was adjusted to remove those over age 70 (seven in each arm removed) (n=551).                                                                                                                                                                                        |
| <b>C</b>        | HSP         | Basecase was restricted to only those who received a delayed prescription (n=223).                                                                                                                                                                                            |
| <b>D</b>        | HSP         | Basecase was restricted to those who did not receive a delayed prescription (n=342).                                                                                                                                                                                          |
| <b>E</b>        | HSP         | Basecase was restricted to only those reporting current smoker status (n=103).                                                                                                                                                                                                |
| <b>F</b>        | HSP         | Basecase was adjusted and the imputed EQ-5D-5L differences from baseline at 24 hours were used as the outcome measure.                                                                                                                                                        |
| <b>G</b>        | HSP         | Basecase was adjusted and the imputed EQ-5D-5L differences from baseline at 48 hours were used as the outcome measure.                                                                                                                                                        |
| <b>H</b>        | HSP         | Basecase was adjusted and the imputed EQ-VAS averages from baseline to Day 7 were used as the outcome measure.                                                                                                                                                                |
| <b>I</b>        | SCP         | Basecase was combined with costs associated with over-the-counter medications used , productivity losses due to missed days at work/ school for days 1 to 7 of the trial follow-up and costs associated with inability to carry out usual activities for days 1 to 7.         |
| <b>J</b>        | SCP         | Basecase was combined with costs associated with over-the-counter medications used , productivity losses due to missed days at work/ school for days 0 to 7 of the trial follow-up and costs associated with inability to carry out usual activities for days 0 to 7.         |
| <b>K</b>        | SCP         | Option I was adjusted to remove costs of serious adverse events (one in each arm) and adverse events (one in the control group) (n=562).                                                                                                                                      |
| <b>L</b>        | SCP         | Option I was combined with antibiotic prescription charges that would be paid by workers/ students.                                                                                                                                                                           |
| <b>M</b>        | SCP         | Option I was combined with antibiotic prescription charges that would be paid by workers only.                                                                                                                                                                                |
| <b>N</b>        | SCP         | Option I was restricted to only those who received a delayed prescription (n=223).                                                                                                                                                                                            |
| <b>O</b>        | SCP         | Option I was restricted to those who did not receive a delayed prescription (n=342).                                                                                                                                                                                          |
| <b>P</b>        | SCP         | Option I was restricted to only those reporting current smoker status (n=103).                                                                                                                                                                                                |
| <b>Q</b>        | SCP         | Option I adopted the outcome measured at 24 hours                                                                                                                                                                                                                             |
| <b>R</b>        | SCP         | Option I adopted the outcome measured at 48 hours                                                                                                                                                                                                                             |
| <b>S</b>        | SCP         | Option I was adjusted and the imputed EQ-VAS averages from baseline to Day 7 were used as the outcome measure.                                                                                                                                                                |

**Table A3: Summary of multiple imputation analysis methods**

The following variables were used in the multiple imputation dataset:

- EQ-5D-5L index values for day 0-7
- EQ-VAS scores for day 0-7
- Symptom resolution at 24 hours and 48 hours
- A treatment arm identifier
- A dichotomous variable to highlight patient experienced an SAE
- A dichotomous variable for delayed antibiotic prescription given
- Costs: intervention, antibiotics, OTC medication, resource use day 1-7, resource use day 8-28, missed work/ education, missed usual activities
- Patient characteristics: gender, age, employment status, location of care, current smoker, a dichotomous variable for those aged 71 and over.

The 'ICE' command in STATA was used for multiple imputation using chained equations was used. The data was multiply imputed generating 60 datasets using predictive mean matching and separately by treatment allocation based on the variation present in the complete data above. The 'seed' add-on sets a random number seed (this was set at 10), which is useful to improve consistency across imputations.

The following is the STATA code used:

```
"ice index_5L_day0 index_5L_day1 index_5L_day2 index_5L_day3 index_5L_day4 index_5L_day5
index_5L_day6 index_5L_day7 VAS_day0 VAS_day1 VAS_day2 VAS_day3 VAS_day4 VAS_day5 VAS_day6
VAS_day7 sae outlier resol48 cost_reportedantibiose totalcost_OTC resourceusediary_cost
resourceuseFU_cost missed_days_costday1tounk cost_usualact1tounk trt delayed_script Male worker age
current_smoker location age71andover, saving(MI_aggregated, replace) m(60) match genmiss(indmiss)
by(trt) seed(10)"
```



**Table A4: Quality of Life Analysis for ITT Impute Cohort (unadjusted)**

| <b>EQ-5D-5L Imputed Full ITT</b>                   |         |              |            |           |
|----------------------------------------------------|---------|--------------|------------|-----------|
|                                                    | Control | Intervention | Diff (I-C) | % Δ (I-C) |
| <b>Baseline</b>                                    | 0.746   | 0.766        | 0.0196     | 2.62%     |
| <b>Day 1</b>                                       | 0.829   | 0.848        | 0.0189     | 2.28%     |
| <b>Day 2</b>                                       | 0.861   | 0.871        | 0.0092     | 1.07%     |
| <b>Day 3</b>                                       | 0.904   | 0.907        | 0.0023     | 0.25%     |
| <b>Day 4</b>                                       | 0.918   | 0.931        | 0.0132     | 1.43%     |
| <b>Day 5</b>                                       | 0.932   | 0.940        | 0.0074     | 0.79%     |
| <b>Day 6</b>                                       | 0.939   | 0.950        | 0.0112     | 1.19%     |
| <b>Day 7</b>                                       | 0.947   | 0.949        | 0.0028     | 0.30%     |
| <b>QAW<sup>1</sup></b>                             | 6.289   | 6.354        | 0.0652     | 1.04%     |
| <b>EQ-5D VAS Imputed Full ITT</b>                  |         |              |            |           |
|                                                    | Control | Intervention | Diff (I-C) | % Δ (I-C) |
| <b>Baseline</b>                                    | 49.78   | 52.41        | 2.631      | 5.29%     |
| <b>Day 1</b>                                       | 57.99   | 60.83        | 2.840      | 4.90%     |
| <b>Day 2</b>                                       | 64.44   | 64.57        | 0.126      | 0.19%     |
| <b>Day 3</b>                                       | 70.98   | 70.27        | -0.714     | -1.01%    |
| <b>Day 4</b>                                       | 74.74   | 74.35        | -0.389     | -0.52%    |
| <b>Day 5</b>                                       | 78.66   | 77.16        | -1.497     | -1.90%    |
| <b>Day 6</b>                                       | 81.99   | 80.25        | -1.733     | -2.11%    |
| <b>Day 7</b>                                       | 84.94   | 82.37        | -2.571     | -3.03%    |
| <b>aVAS<sup>2</sup></b>                            | 70.44   | 70.27        | -0.162     | -0.23%    |
| <b>Delayed Prescription- Imputed ITT Cohort</b>    |         |              |            |           |
|                                                    | Control | Intervention | Diff (I-C) | % Δ (I-C) |
| <b>Baseline</b>                                    | 0.7431  | 0.7303       | -0.0128    | -1.72%    |
| <b>Day 1</b>                                       | 0.8158  | 0.8404       | 0.0246     | 3.01%     |
| <b>Day 2</b>                                       | 0.8384  | 0.8576       | 0.0193     | 2.30%     |
| <b>Day 3</b>                                       | 0.9061  | 0.9180       | 0.0119     | 1.31%     |
| <b>Day 4</b>                                       | 0.9180  | 0.9441       | 0.0261     | 2.85%     |
| <b>Day 5</b>                                       | 0.9276  | 0.9579       | 0.0303     | 3.27%     |
| <b>Day 6</b>                                       | 0.9390  | 0.9649       | 0.0259     | 2.76%     |
| <b>Day 7</b>                                       | 0.9480  | 0.9663       | 0.0183     | 1.93%     |
| <b>QAW<sup>1</sup></b>                             | 6.2569  | 6.3943       | 0.1374     | 2.20%     |
| <b>No Delayed Prescription- Imputed ITT Cohort</b> |         |              |            |           |
|                                                    | Control | Intervention | Diff (I-C) | % Δ (I-C) |
| <b>Baseline</b>                                    | 0.7480  | 0.7892       | 0.0411     | 5.50%     |
| <b>Day 1</b>                                       | 0.8381  | 0.8535       | 0.0154     | 1.84%     |
| <b>Day 2</b>                                       | 0.8762  | 0.8793       | 0.0031     | 0.35%     |
| <b>Day 3</b>                                       | 0.9035  | 0.8993       | -0.0041    | -0.46%    |
| <b>Day 4</b>                                       | 0.9179  | 0.9225       | 0.0046     | 0.50%     |
| <b>Day 5</b>                                       | 0.9351  | 0.9273       | -0.0078    | -0.83%    |
| <b>Day 6</b>                                       | 0.9382  | 0.9396       | 0.0014     | 0.14%     |
| <b>Day 7</b>                                       | 0.9457  | 0.9382       | -0.0075    | -0.79%    |
| <b>QAW<sup>1</sup></b>                             | 6.3099  | 6.3281       | 0.0182     | 0.29%     |

1. Quality-adjusted week estimated using area under the curve estimation.

2. Average VAS score estimated average across baseline to day 7.

**Table A5: Quality of Life Analysis for Complete Cases (unadjusted)**

| <b>EQ-5D-5L Analysis</b>                     |                |                   |                                |         |
|----------------------------------------------|----------------|-------------------|--------------------------------|---------|
|                                              | Control        | Intervention      | Difference (I-C)               | P value |
|                                              | n=172          | n=165             |                                |         |
| <b>Baseline</b>                              | 0.735          | 0.755             | 0.021                          | ns      |
| <b>Day 1</b>                                 | 0.821          | 0.843             | 0.021                          | ns      |
| <b>Day 2</b>                                 | 0.862          | 0.871             | 0.01                           | ns      |
| <b>Day 3</b>                                 | 0.899          | 0.903             | 0.004                          | ns      |
| <b>Day 4</b>                                 | 0.916          | 0.926             | 0.01                           | ns      |
| <b>Day 5</b>                                 | 0.929          | 0.933             | 0.003                          | ns      |
| <b>Day 6</b>                                 | 0.939          | 0.947             | 0.007                          | ns      |
| <b>Day 7</b>                                 | 0.947          | 0.951             | 0.004                          | ns      |
| <b>Average (Day 1-7)</b>                     | 0.902          | 0.91              | 0.008                          | ns      |
| <b>Average Δ (%) from Baseline</b>           | 0.167 (22.7)   | 0.155 (20.5)      | -0.012                         | ns      |
| <b>Average Δ (%) from Baseline at 24 hrs</b> | 0.087 (11.8)   | 0.087 (11.5)      | 0                              | ns      |
| <b>Average Δ (%) from Baseline at 48 hrs</b> | 0.107 (14.6)   | 0.101 (13.4)      | -0.005                         | ns      |
| <b>EQ-VAS Analysis</b>                       |                |                   |                                |         |
|                                              | Control        | Intervention      | Difference (I-C)               | P value |
|                                              | n=166          | n=161             |                                |         |
| <b>Baseline</b>                              | 49             | 52                | 3                              | ns      |
| <b>Day 1</b>                                 | 57             | 61                | 4                              | ns      |
| <b>Day 2</b>                                 | 64             | 65                | 1                              | ns      |
| <b>Day 3</b>                                 | 70             | 70                | 0                              | ns      |
| <b>Day 4</b>                                 | 75             | 74                | -1                             | ns      |
| <b>Day 5</b>                                 | 79             | 77                | -2                             | ns      |
| <b>Day 6</b>                                 | 82             | 80                | -2                             | ns      |
| <b>Day 7</b>                                 | 86             | 83                | -3                             | ns      |
| <b>Average (Day 1-7)</b>                     | 73             | 73                | 0                              | ns      |
| <b>Average Δ (%) from Baseline</b>           | 24 (49)        | 21 (40)           | -3                             | ns      |
| <b>Average Δ (%) from Baseline at 24 hrs</b> | 8 (16)         | 9 (17)            | 1                              | ns      |
| <b>Average Δ (%) from Baseline at 48 hrs</b> | 15 (31)        | 13 (25)           | -2                             | ns      |
| <b>EQ-5D-5L Sub-group Analysis</b>           |                |                   |                                |         |
|                                              | Delayed Script | No Delayed Script | Difference (Delayed-No Script) | P value |
|                                              | n=121          | n=216             |                                |         |
| <b>Baseline</b>                              | 0.709          | 0.765             | -0.055                         | 0.005   |
| <b>Day 1</b>                                 | 0.813          | 0.842             | -0.029                         | 0.059   |
| <b>Day 2</b>                                 | 0.878          | 0.846             | -0.032                         | 0.041   |
| <b>Day 3</b>                                 | 0.903          | 0.9               | 0.003                          | ns      |
| <b>Day 4</b>                                 | 0.925          | 0.919             | 0.006                          | ns      |
| <b>Day 5</b>                                 | 0.935          | 0.929             | 0.006                          | ns      |
| <b>Day 6</b>                                 | 0.948          | 0.94              | 0.008                          | ns      |
| <b>Day 7</b>                                 | 0.959          | 0.943             | 0.016                          | ns      |
| <b>Average (Day 1-7)</b>                     | 0.904          | 0.907             | -0.003                         |         |
| <b>Average Δ (%) from Baseline</b>           | 0.195 (27.5)   | 0.143 (18.7)      | 0.052                          | 0.001   |
| <b>Average Δ (%) from Baseline at 24 hrs</b> | 0.119 (20.7)   | 0.092 (14.1)      | 0.027                          | ns      |
| <b>Average Δ (%) from Baseline at 48 hrs</b> | 0.180 (31.3)   | 0.151 (23.3)      | 0.029                          | ns      |

Figure A1: Missingness assessment in EQ-5D-5L

1  
2  
3  
4  
5  
6  
7  
8  
9  
10  
11  
12  
13  
14  
15  
16  
17  
18  
19  
20  
21  
22  
23  
24  
25  
26  
27  
28  
29  
30  
31  
32  
33  
34  
35  
36  
37  
38  
39  
40  
41  
42  
43  
44  
45  
46  
47  
48  
49  
50  
51  
52  
53  
54  
55  
56  
57  
58  
59  
60

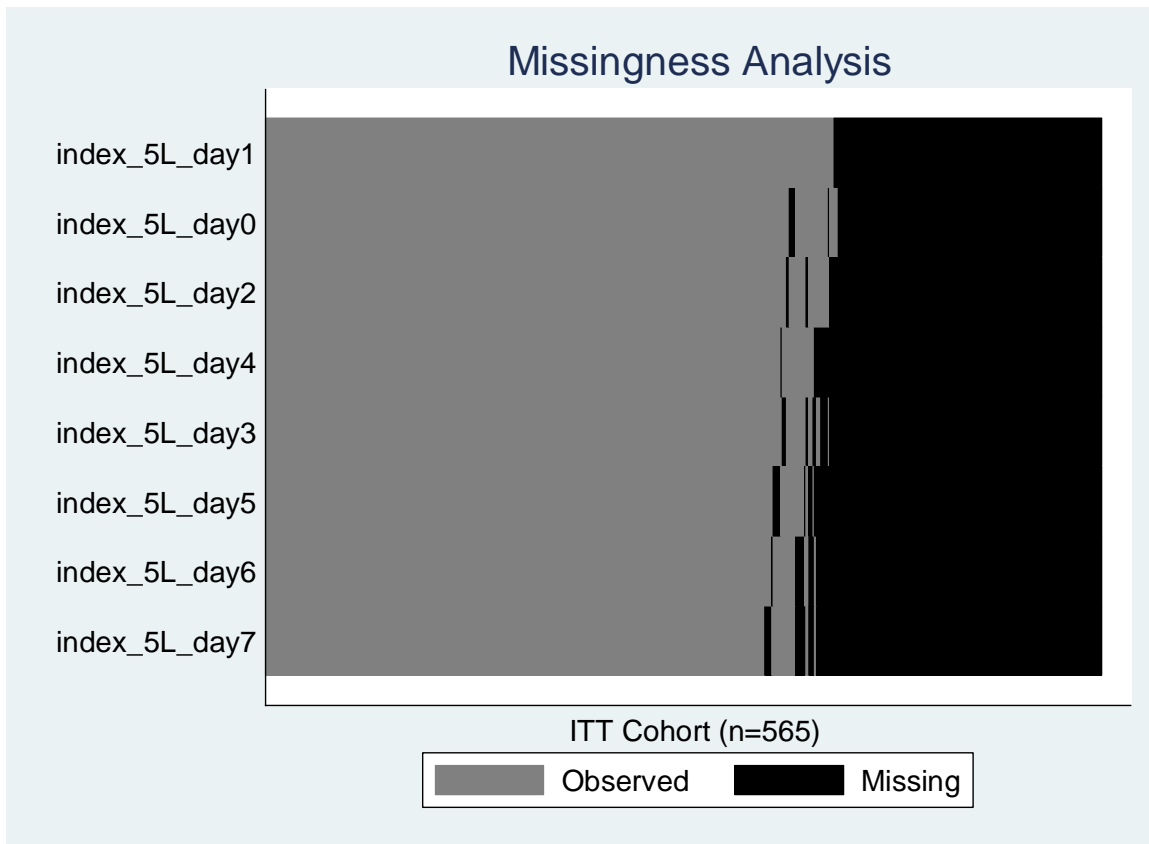

Figure A2: QALY distribution by treatment arm

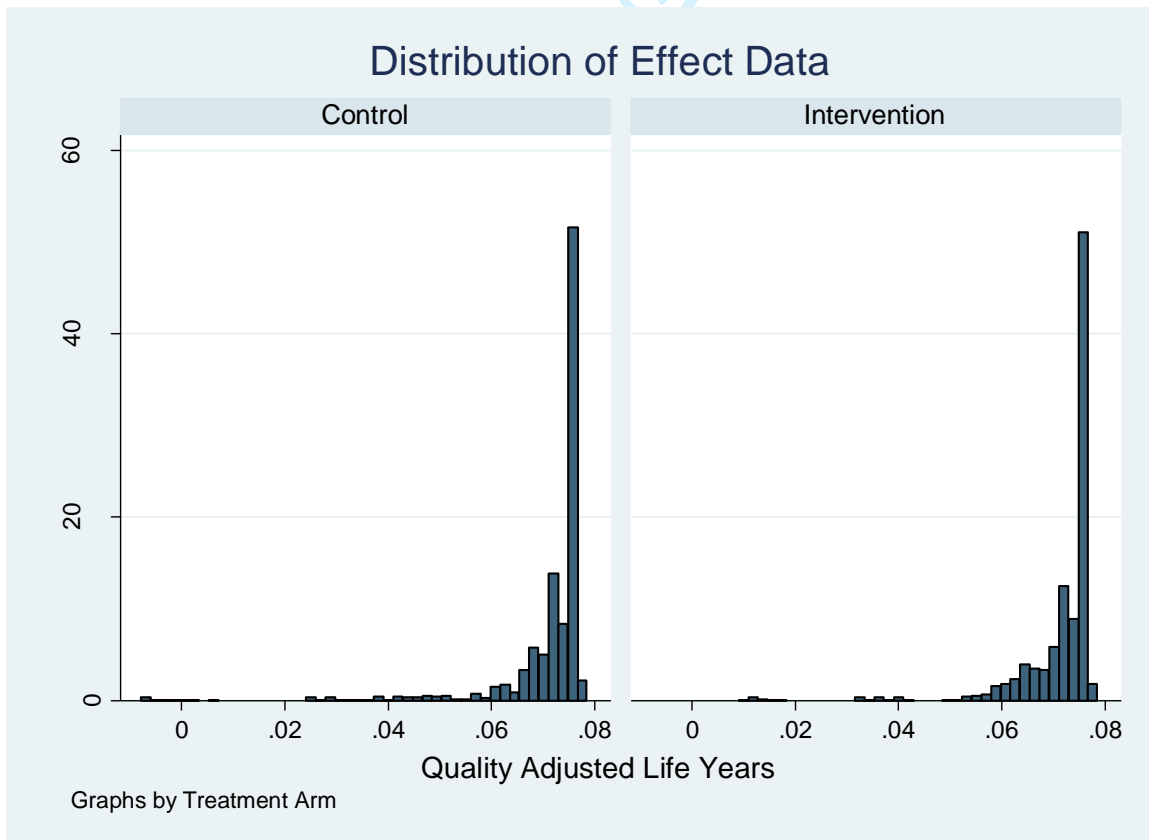

**Figure A3: EQ-5D-5L Imputed Scores for ITT Cohort**

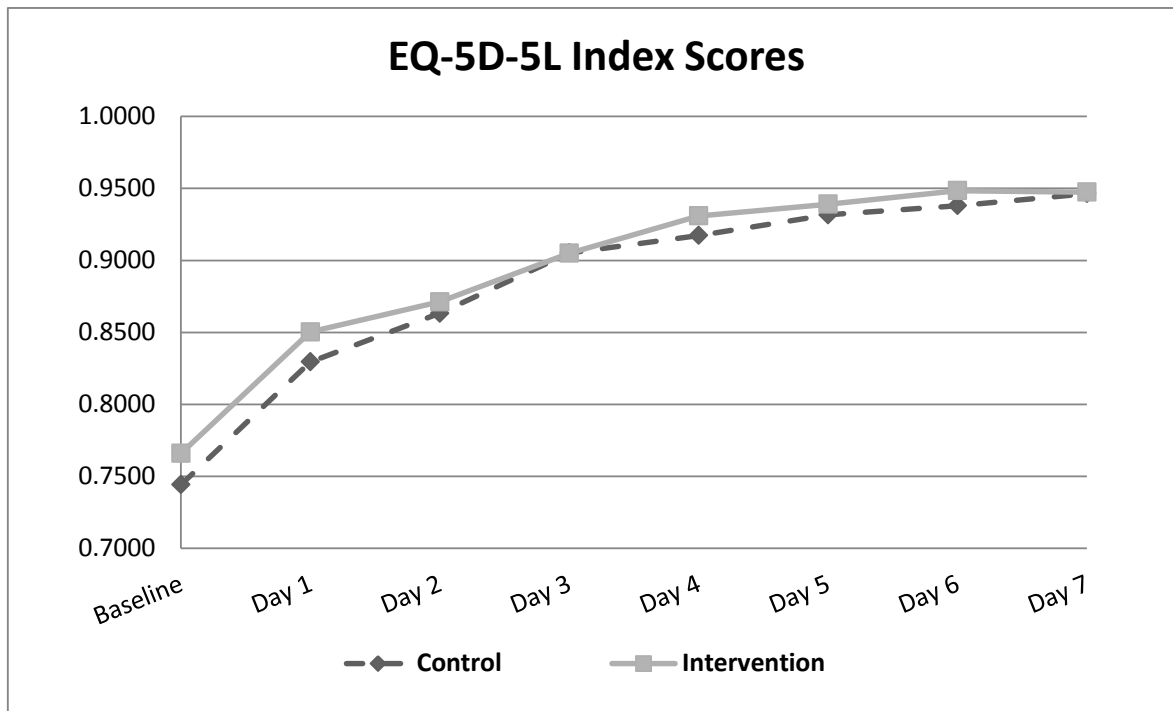

**Figure A4: EQ-5D Visual Analogue Scale Imputed Scores for ITT Cohort**

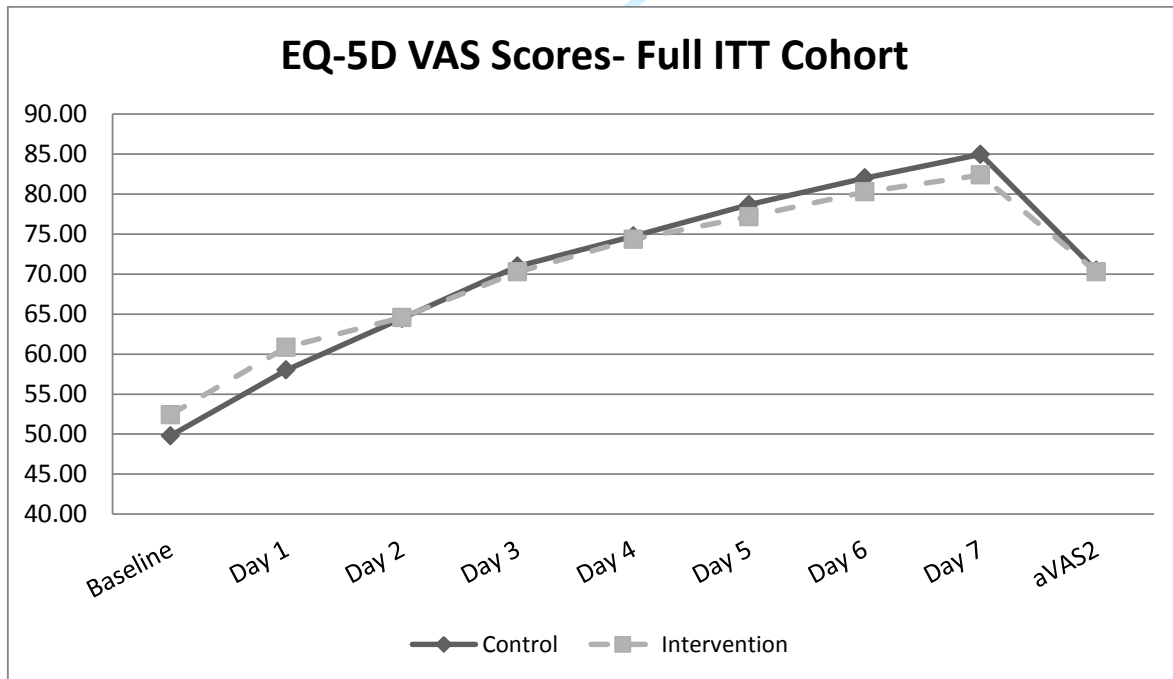

Figure A5: Cost-effectiveness Acceptability Curve

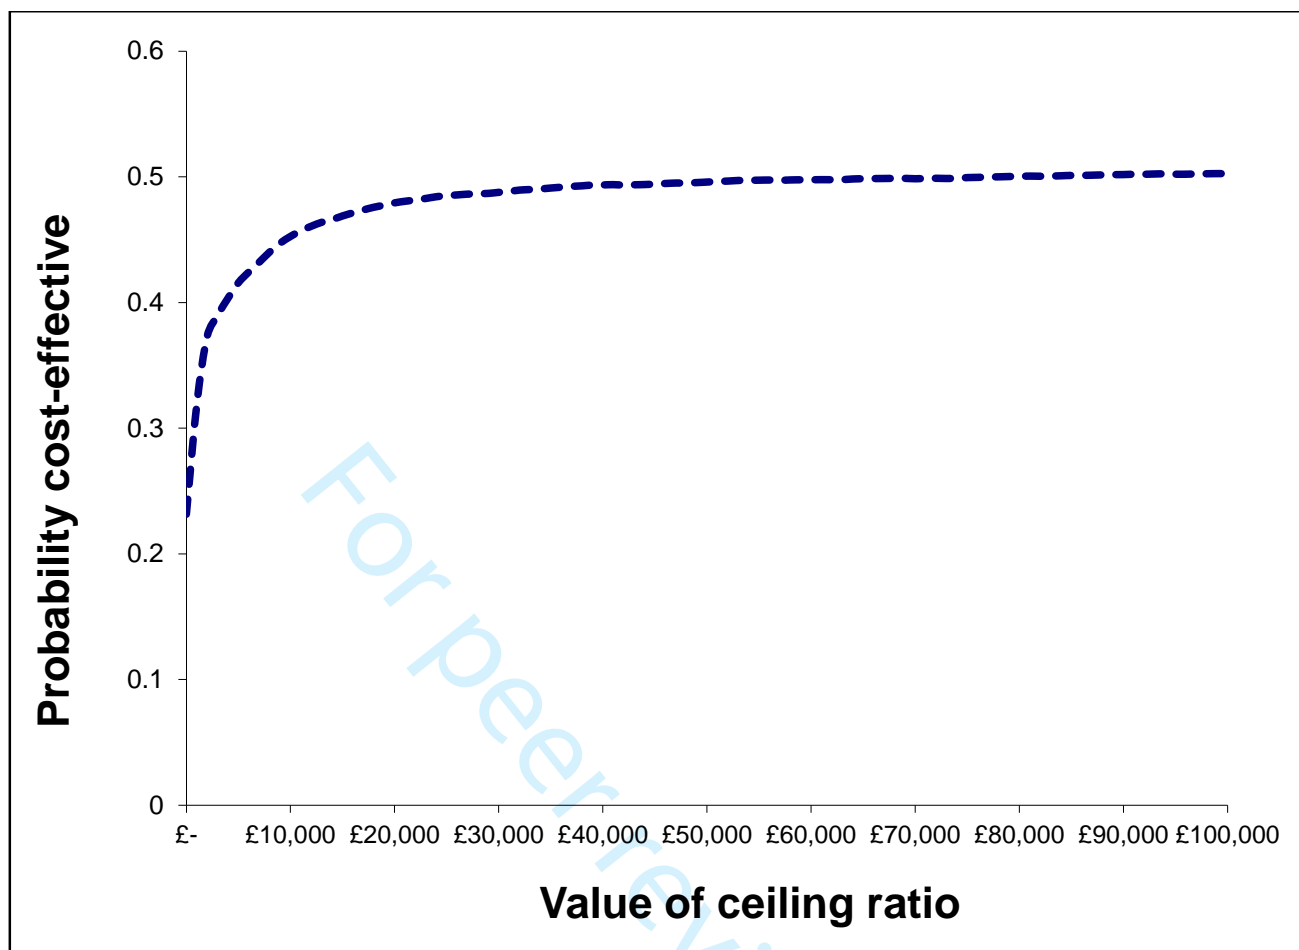

For peer review only

1 "An Economic Analysis of Oral Dexamethasone for Symptom Relief  
 2\* of Sore Throat: The UK TOAST Study"  
 3 The CHEERS Checklist is part of the CHEERS Statement. The CHEERS Statement has been  
 4 endorsed and co-published by the following journals:  
 5  
 6

7 BJOG: An International Journal of Obstetrics and Gynaecology

8 BMC Medicine 2013; 11:80

9 BMJ 2013;346:f1049

10 Clinical Therapeutics 27 March 2013 (Article in Press DOI: 10.1016/j.clinthera.2013.03.003)

11 Cost Effectiveness and Resource Allocation 2013 11:6.

12 The European Journal of Health Economics 2013 Mar 26. [Epub ahead of print]

13 International Journal of Technology Assessment in Health Care

14 Journal of Medical Economics 2013 Mar 25. [Epub ahead of print]

15 Pharmacoeconomics 2013 Mar 26. [Epub ahead of print]

16 Value in Health 2013 March - April;16(2):e1-e5  
 17  
 18

### 19 CHEERS Checklist

#### 20 Items to include when reporting economic evaluations of health interventions

| 23 Section/item                          | 24 Item No | 25 Recommendation                                                                                                                                                                                            | 26 Reported on page No/<br>line No |
|------------------------------------------|------------|--------------------------------------------------------------------------------------------------------------------------------------------------------------------------------------------------------------|------------------------------------|
| 27 <b>Title and abstract</b>             |            |                                                                                                                                                                                                              |                                    |
| 28 Title                                 | 1          | 29 Identify the study as an economic evaluation or use more<br>30 specific terms such as "cost-effectiveness analysis", and<br>31 describe the interventions compared.                                       | 1   1                              |
| 32 Abstract                              | 2          | 33 Provide a structured summary of objectives, perspective,<br>34 setting, methods (including study design and inputs), results<br>35 (including base case and uncertainty analyses), and<br>36 conclusions. | 3 & 4                              |
| 37 <b>Introduction</b>                   |            |                                                                                                                                                                                                              |                                    |
| 38 Background and<br>39 objectives       | 3          | 40 Provide an explicit statement of the broader context for the<br>41 study.<br>42 Present the study question and its relevance for health policy or<br>43 practice decisions.                               | 5                                  |
| 44 <b>Methods</b>                        |            |                                                                                                                                                                                                              |                                    |
| 45 Target population and<br>46 subgroups | 4          | 47 Describe characteristics of the base case population and<br>48 subgroups analysed, including why they were chosen.                                                                                        | 6                                  |
| 49 Setting and location                  | 5          | 50 State relevant aspects of the system(s) in which the decision(s)<br>51 need(s) to be made.                                                                                                                | 6                                  |
| 52 Study perspective                     | 6          | 53 Describe the perspective of the study and relate this to the<br>54 costs being evaluated.                                                                                                                 | 6                                  |
| 55 Comparators                           | 7          | 56 Describe the interventions or strategies being compared and<br>57 state why they were chosen.                                                                                                             | 6                                  |
| 58 Time horizon                          | 8          | 59 State the time horizon(s) over which costs and consequences<br>60 are being evaluated and say why appropriate.                                                                                            | 6                                  |
| Discount rate                            | 9          | Report the choice of discount rate(s) used for costs and                                                                                                                                                     | n/a                                |

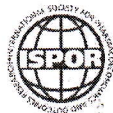

|    |                         |     |                                                                       |                       |
|----|-------------------------|-----|-----------------------------------------------------------------------|-----------------------|
| 1  |                         |     |                                                                       |                       |
| 2  |                         |     | outcomes and say why appropriate.                                     | <u>6</u>              |
| 3  | Choice of health        | 10  | Describe what outcomes were used as the measure(s) of                 |                       |
| 4  | outcomes                |     | benefit in the evaluation and their relevance for the type of         |                       |
| 5  |                         |     | analysis performed.                                                   | <u>6&amp;7</u>        |
| 6  | Measurement of          | 11a | <i>Single study-based estimates:</i> Describe fully the design        |                       |
| 7  | effectiveness           |     | features of the single effectiveness study and why the single         |                       |
| 8  |                         |     | study was a sufficient source of clinical effectiveness data.         | <u>7&amp;8</u>        |
| 9  |                         | 11b | <i>Synthesis-based estimates:</i> Describe fully the methods used for |                       |
| 10 |                         |     | identification of included studies and synthesis of clinical          |                       |
| 11 |                         |     | effectiveness data.                                                   | <u>n/a</u>            |
| 12 |                         | 12  | If applicable, describe the population and methods used to            |                       |
| 13 | Measurement and         |     | elicit preferences for outcomes.                                      | <u>n/a</u>            |
| 14 | valuation of preference |     |                                                                       |                       |
| 15 | based outcomes          | 13a | <i>Single study-based economic evaluation:</i> Describe approaches    |                       |
| 16 | Estimating resources    |     | used to estimate resource use associated with the alternative         |                       |
| 17 | and costs               |     | interventions. Describe primary or secondary research methods         |                       |
| 18 |                         |     | for valuing each resource item in terms of its unit cost.             |                       |
| 19 |                         |     | Describe any adjustments made to approximate to opportunity           |                       |
| 20 |                         |     | costs.                                                                | <u>7</u>              |
| 21 |                         | 13b | <i>Model-based economic evaluation:</i> Describe approaches and       |                       |
| 22 |                         |     | data sources used to estimate resource use associated with            |                       |
| 23 |                         |     | model health states. Describe primary or secondary research           |                       |
| 24 |                         |     | methods for valuing each resource item in terms of its unit           |                       |
| 25 |                         |     | cost. Describe any adjustments made to approximate to                 |                       |
| 26 |                         |     | opportunity costs.                                                    | <u>7</u>              |
| 27 |                         | 14  | Report the dates of the estimated resource quantities and unit        |                       |
| 28 | Currency, price date,   |     | costs. Describe methods for adjusting estimated unit costs to         |                       |
| 29 | and conversion          |     | the year of reported costs if necessary. Describe methods for         |                       |
| 30 |                         |     | converting costs into a common currency base and the                  |                       |
| 31 |                         |     | exchange rate.                                                        | <u>8</u>              |
| 32 | Choice of model         | 15  | Describe and give reasons for the specific type of decision-          |                       |
| 33 |                         |     | analytical model used. Providing a figure to show model               |                       |
| 34 |                         |     | structure is strongly recommended.                                    | <u>8&amp;9&amp;10</u> |
| 35 | Assumptions             | 16  | Describe all structural or other assumptions underpinning the         |                       |
| 36 |                         |     | decision-analytical model.                                            | <u>8&amp;9&amp;10</u> |
| 37 | Analytical methods      | 17  | Describe all analytical methods supporting the evaluation. This       |                       |
| 38 |                         |     | could include methods for dealing with skewed, missing, or            |                       |
| 39 |                         |     | censored data; extrapolation methods; methods for pooling             |                       |
| 40 |                         |     | data; approaches to validate or make adjustments (such as half        |                       |
| 41 |                         |     | cycle corrections) to a model; and methods for handling               |                       |
| 42 |                         |     | population heterogeneity and uncertainty.                             | <u>8&amp;9&amp;10</u> |
| 43 |                         |     |                                                                       |                       |
| 44 | <b>Results</b>          |     |                                                                       |                       |
| 45 | Study parameters        | 18  | Report the values, ranges, references, and, if used, probability      |                       |
| 46 |                         |     | distributions for all parameters. Report reasons or sources for       |                       |
| 47 |                         |     | distributions used to represent uncertainty where appropriate.        |                       |
| 48 |                         |     | Providing a table to show the input values is strongly                |                       |
| 49 |                         |     | recommended.                                                          | <u>10-12</u>          |
| 50 |                         |     |                                                                       |                       |
| 51 |                         |     |                                                                       |                       |
| 52 |                         |     |                                                                       |                       |
| 53 |                         |     |                                                                       |                       |
| 54 |                         |     |                                                                       |                       |
| 55 |                         |     |                                                                       |                       |
| 56 |                         |     |                                                                       |                       |
| 57 |                         |     |                                                                       |                       |
| 58 |                         |     |                                                                       |                       |
| 59 |                         |     |                                                                       |                       |
| 60 |                         |     |                                                                       |                       |

& Online appendix

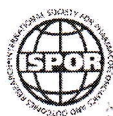

|    |                       |     |                                                                     |         |
|----|-----------------------|-----|---------------------------------------------------------------------|---------|
| 1  |                       |     |                                                                     |         |
| 2  | Incremental costs and | 19  | For each intervention, report mean values for the main              |         |
| 3  | outcomes              |     | categories of estimated costs and outcomes of interest, as well     | 10-12   |
| 4  |                       |     | as mean differences between the comparator groups. If               | & 21-25 |
| 5  |                       |     | applicable, report incremental cost-effectiveness ratios.           |         |
| 6  | Characterising        | 20a | <i>Single study-based economic evaluation:</i> Describe the effects |         |
| 7  | uncertainty           |     | of sampling uncertainty for the estimated incremental cost and      | 11-12   |
| 8  |                       |     | incremental effectiveness parameters, together with the impact      | 25      |
| 9  |                       |     | of methodological assumptions (such as discount rate, study         |         |
| 10 |                       |     | perspective).                                                       |         |
| 11 |                       | 20b | <i>Model-based economic evaluation:</i> Describe the effects on the | 11-12   |
| 12 |                       |     | results of uncertainty for all input parameters, and uncertainty    | 25      |
| 13 |                       |     | related to the structure of the model and assumptions.              |         |
| 14 |                       |     |                                                                     |         |
| 15 | Characterising        | 21  | If applicable, report differences in costs, outcomes, or cost-      |         |
| 16 | heterogeneity         |     | effectiveness that can be explained by variations between           | 11-12   |
| 17 |                       |     | subgroups of patients with different baseline characteristics or    | 25      |
| 18 |                       |     | other observed variability in effects that are not reducible by     |         |
| 19 |                       |     | more information.                                                   |         |
| 20 |                       |     |                                                                     |         |
| 21 |                       |     |                                                                     |         |
| 22 | <b>Discussion</b>     |     |                                                                     |         |
| 23 | Study findings,       | 22  | Summarise key study findings and describe how they support          |         |
| 24 | limitations,          |     | the conclusions reached. Discuss limitations and the                | 13-15   |
| 25 | generalisability, and |     | generalisability of the findings and how the findings fit with      |         |
| 26 | current knowledge     |     | current knowledge.                                                  |         |
| 27 |                       |     |                                                                     |         |
| 28 | <b>Other</b>          |     |                                                                     |         |
| 29 | Source of funding     | 23  | Describe how the study was funded and the role of the funder        |         |
| 30 |                       |     | in the identification, design, conduct, and reporting of the        | 16      |
| 31 |                       |     | analysis. Describe other non-monetary sources of support.           |         |
| 32 |                       |     |                                                                     |         |
| 33 | Conflicts of interest | 24  | Describe any potential for conflict of interest of study            |         |
| 34 |                       |     | contributors in accordance with journal policy. In the absence      | 16-17   |
| 35 |                       |     | of a journal policy, we recommend authors comply with               |         |
| 36 |                       |     | International Committee of Medical Journal Editors                  |         |
| 37 |                       |     | recommendations.                                                    |         |
| 38 |                       |     |                                                                     |         |

For consistency, the CHEERS Statement checklist format is based on the format of the CONSORT statement checklist

The CHEERS Statement may be accessed by the publication links above.

The ISPOR CHEERS Task Force Report provides examples and further discussion of the 24-item CHEERS Checklist and the CHEERS Statement. It may be accessed via the *Value in Health* link or via the ISPOR Health Economic Evaluation Publication Guidelines – CHEERS: Good Reporting Practices webpage: <http://www.ispor.org/TaskForces/EconomicPubGuidelines.asp>

The citation for the CHEERS Task Force Report is:

Husereau D, Drummond M, Petrou S, et al. Consolidated health economic evaluation reporting standards (CHEERS)—Explanation and elaboration: A report of the ISPOR health economic evaluations publication guidelines good reporting practices task force. *Value Health* 2013;16:231-50.

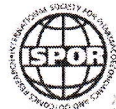

Supplement: bmjopen-2017-019184.draft_revisions.pdf [file bmjopen-2017-019184.draft_revisions.pdf]
