# Supplementary material for: Economic analysis of oral dexamethasone for symptom relief of sore throat: the UK TOAST study
Source: PubMed Central journal article supplement — BMJ Open. 2018 Apr 28;8(4):e019184. doi: 10.1136/bmjopen-2017-019184 (PMC5931286; doi:10.1136/bmjopen-2017-019184), 2018-04-28

## TOAST ONLINE APPENDIX

*Table A1- Trial Resource Use Costs*

| <b>TOAST TRIAL UNIT COSTS (2015 £)</b> |                                                   |                 |                              |                                                  |
|----------------------------------------|---------------------------------------------------|-----------------|------------------------------|--------------------------------------------------|
| <b>Cost ID</b>                         | <b>Cost Description</b>                           | <b>2015 (£)</b> | <b>Measure</b>               | <b>Details</b>                                   |
| <b>Int1</b>                            | Oral Steroid                                      | £ 5.04          | 1 dose                       | single 10mg dose of oral dexamethasone, BNF 2015 |
| <b>Int2</b>                            | GP Visit                                          | £ 44.00         | 11.7 minute consult          | PSSRU 2015                                       |
| <b>Int3</b>                            | Pharmacist                                        | £ 6.00          | 5 minute consult             | British National Formulary (BNF) 2015            |
| <b>Anti1</b>                           | Penicillin                                        | £ 0.04          | per 250mg tab                | BNF 2015                                         |
| <b>Anti2</b>                           | Erythromycin                                      | £ 0.04          | per 250mg tab                | BNF 2015                                         |
| <b>Anti3</b>                           | Clarithromycin                                    | £ 0.21          | per 500mg tab                | BNF 2015                                         |
| <b>Anti4</b>                           | Amoxicillin                                       | £ 0.08          | per 500mg tab                | BNF 2015                                         |
| <b>Anti5</b>                           | Coamoxiclav                                       | £ 0.20          | per 500mg tab                | BNF 2015                                         |
| <b>Anti6</b>                           | Doxycycline                                       | £ 0.14          | per 500mg tab                | BNF 2015                                         |
| <b>Otc1</b>                            | Paracetamol                                       | £ 0.24          | per recommended daily dose   | Boots Pharmacy Generic Brand, 2015               |
| <b>Otc2</b>                            | Ibuprofen (NSAIDs)                                | £ 0.60          | per recommended daily dose   | Boots Pharmacy Generic Brand, 2015               |
| <b>Otc3</b>                            | Anaesthetic spray                                 | £ 1.25          | per recommended daily dose   | Boots Pharmacy Generic Brand, 2015               |
| <b>Otc4</b>                            | Anaesthetic lozenges                              | £ 1.40          | per recommended daily dose   | Boots Pharmacy Generic Brand, 2015               |
| <b>Otc5</b>                            | Decongestant                                      | £ 1.00          | per recommended daily dose   | Boots Pharmacy Generic Brand, 2015               |
| <b>Otc6</b>                            | Lozenges (non-analgesic)                          | £ 0.66          | per recommended daily dose   | Boots Pharmacy Generic Brand, 2015               |
| <b>Otc7</b>                            | Other analgesia (cocodamol/ cough medicine, etc.) | £ 1.05          | per recommended daily dose   | Boots Pharmacy Generic Brand, 2015               |
| <b>Wage1</b>                           | Cost of an adult working day                      | £ 119.37        | median gross annual earnings | Office of National Statistics (UK)               |
| <b>Wage2</b>                           | Minimum wage day rate                             | £ 53.60         | October 2015 value           | Office of National Statistics (UK)               |
| <b>Admin1</b>                          | NHS prescription charge                           | £ 8.20          |                              | National Health Service (UK)-(NHS)               |
| <b>Res1</b>                            | GP Nurse                                          | £ 14.47         | 15.5 minute consult          | PSSRU 2015                                       |
| <b>Res2</b>                            | GP Telephone Call                                 | £ 27.00         | 7.1 minute call              | PSSRU 2015                                       |
| <b>Res3</b>                            | Out-of-Hours GP Clinic                            | £ 69.53         |                              | NAO.org                                          |
| <b>Res4</b>                            | 111 Telephone Advice                              | £ 8.14          |                              | Micro-costing study, University of Sheffield     |
| <b>Res5</b>                            | A&E                                               | £ 140.59        | Average weighted cost        | NHS Ref Costs 2015                               |
| <b>Res6</b>                            | Hospital Bed Day – average                        | £ 613.63        | Average weighted cost        | NHS Ref Costs 2015                               |
| <b>Pres1</b>                           | Codeine (co-codamol 30/500)                       | £ 0.06          | per tablet                   | BNF 2015                                         |
| <b>Pres2</b>                           | Codeine Linctus                                   | £ 0.16          | 15mg/ 5 ml                   | BNF 2015                                         |
| <b>Pres3</b>                           | Benzydamine (Diffiam Oromucosal Spray)            | £ 1.41          | 0.15% Spray/ 1 ml            | BNF 2015                                         |
| <b>Pres4</b>                           | Benzyl Penicillin & Metronidazole IV              | £ 12.24         | Daily dose (TBC)             | BNF 2015                                         |

**Table A2- Summary of Economic Analysis Scenarios**

| <b>Options</b>  | <b>Perspective</b> | <b>Details</b>                                                                                                                                                                                                                                                                |
|-----------------|--------------------|-------------------------------------------------------------------------------------------------------------------------------------------------------------------------------------------------------------------------------------------------------------------------------|
| <b>Basecase</b> | HSP                | The basecase scenario included the net cost of the intervention i.e. the cost of the once-off medication, the cost of antibiotics used and the cost of resource use reported including serious adverse events. The adjusted QALY estimate was adopted as the outcome measure. |
| <b>A</b>        | HSP                | Basecase was adjusted to remove effects and costs of serious adverse events (one in each arm) and adverse events (one in the control group) (n=562).                                                                                                                          |
| <b>B</b>        | HSP                | Basecase was adjusted to remove those over age 70 (seven in each arm removed) (n=551).                                                                                                                                                                                        |
| <b>C</b>        | HSP                | Basecase was restricted to only those who received a delayed prescription (n=223).                                                                                                                                                                                            |
| <b>D</b>        | HSP                | Basecase was restricted to those who did not receive a delayed prescription (n=342).                                                                                                                                                                                          |
| <b>E</b>        | HSP                | Basecase was restricted to only those reporting current smoker status (n=103).                                                                                                                                                                                                |
| <b>F</b>        | HSP                | Basecase was adjusted and the imputed EQ-5D-5L differences from baseline at 24 hours were used as the outcome measure.                                                                                                                                                        |
| <b>G</b>        | HSP                | Basecase was adjusted and the imputed EQ-5D-5L differences from baseline at 48 hours were used as the outcome measure.                                                                                                                                                        |
| <b>H</b>        | HSP                | Basecase was adjusted and the imputed EQ-VAS averages from baseline to Day 7 were used as the outcome measure.                                                                                                                                                                |
| <b>I</b>        | SCP                | Basecase was combined with costs associated with over-the-counter medications used , productivity losses due to missed days at work/ school for days 1 to 7 of the trial follow-up and costs associated with inability to carry out usual activities for days 1 to 7.         |
| <b>J</b>        | SCP                | Basecase was combined with costs associated with over-the-counter medications used , productivity losses due to missed days at work/ school for days 0 to 7 of the trial follow-up and costs associated with inability to carry out usual activities for days 0 to 7.         |
| <b>K</b>        | SCP                | Option I was adjusted to remove costs of serious adverse events (one in each arm) and adverse events (one in the control group) (n=562).                                                                                                                                      |
| <b>L</b>        | SCP                | Option I was combined with antibiotic prescription charges that would be paid by workers/ students.                                                                                                                                                                           |
| <b>M</b>        | SCP                | Option I was combined with antibiotic prescription charges that would be paid by workers only.                                                                                                                                                                                |
| <b>N</b>        | SCP                | Option I was restricted to only those who received a delayed prescription (n=223).                                                                                                                                                                                            |
| <b>O</b>        | SCP                | Option I was restricted to those who did not receive a delayed prescription (n=342).                                                                                                                                                                                          |
| <b>P</b>        | SCP                | Option I was restricted to only those reporting current smoker status (n=103).                                                                                                                                                                                                |
| <b>Q</b>        | SCP                | Option I adopted the outcome measured at 24 hours                                                                                                                                                                                                                             |
| <b>R</b>        | SCP                | Option I adopted the outcome measured at 48 hours                                                                                                                                                                                                                             |
| <b>S</b>        | SCP                | Option I was adjusted and the imputed EQ-VAS averages from baseline to Day 7 were used as the outcome measure.                                                                                                                                                                |

**Table A3: Summary of multiple imputation analysis methods**

The following variables were used in the multiple imputation dataset:

- EQ-5D-5L index values for day 0-7
- EQ-VAS scores for day 0-7
- Symptom resolution at 24 hours and 48 hours
- A treatment arm identifier
- A dichotomous variable to highlight patient experienced an SAE
- A dichotomous variable for delayed antibiotic prescription given
- Costs: intervention, antibiotics, OTC medication, resource use day 1-7, resource use day 8-28, missed work/ education, missed usual activities
- Patient characteristics: gender, age, employment status, location of care, current smoker, a dichotomous variable for those aged 71 and over.

The 'ICE' command in STATA was used for multiple imputation using chained equations was used. The data was multiply imputed generating 60 datasets using predictive mean matching and separately by treatment allocation based on the variation present in the complete data above. The 'seed' add-on sets a random number seed (this was set at 10), which is useful to improve consistency across imputations.

The following is the STATA code used:

```
"ice index_5L_day0 index_5L_day1 index_5L_day2 index_5L_day3 index_5L_day4 index_5L_day5  
index_5L_day6 index_5L_day7 VAS_day0 VAS_day1 VAS_day2 VAS_day3 VAS_day4 VAS_day5 VAS_day6  
VAS_day7 sae outlier resol48 cost_reportedantibiose totalcost_OTC resourceusediary_cost  
resourceuseFU_cost missed_days_costday1tounk cost_usualact1tounk trt delayed_script Male worker age  
current_smoker location age71andover, saving(MI_aggregated, replace) m(60) match genmiss(indmiss)  
by(trt) seed(10)"
```

**Table A4: Quality of Life Analysis for ITT Impute Cohort (unadjusted)**

| <b>EQ-5D-5L Imputed Full ITT</b>                   |         |              |            |           |
|----------------------------------------------------|---------|--------------|------------|-----------|
|                                                    | Control | Intervention | Diff (I-C) | % Δ (I-C) |
| <b>Baseline</b>                                    | 0.746   | 0.766        | 0.0196     | 2.62%     |
| <b>Day 1</b>                                       | 0.829   | 0.848        | 0.0189     | 2.28%     |
| <b>Day 2</b>                                       | 0.861   | 0.871        | 0.0092     | 1.07%     |
| <b>Day 3</b>                                       | 0.904   | 0.907        | 0.0023     | 0.25%     |
| <b>Day 4</b>                                       | 0.918   | 0.931        | 0.0132     | 1.43%     |
| <b>Day 5</b>                                       | 0.932   | 0.940        | 0.0074     | 0.79%     |
| <b>Day 6</b>                                       | 0.939   | 0.950        | 0.0112     | 1.19%     |
| <b>Day 7</b>                                       | 0.947   | 0.949        | 0.0028     | 0.30%     |
| <b>QAW<sup>1</sup></b>                             | 6.289   | 6.354        | 0.0652     | 1.04%     |
| <b>EQ-5D VAS Imputed Full ITT</b>                  |         |              |            |           |
|                                                    | Control | Intervention | Diff (I-C) | % Δ (I-C) |
| <b>Baseline</b>                                    | 49.78   | 52.41        | 2.631      | 5.29%     |
| <b>Day 1</b>                                       | 57.99   | 60.83        | 2.840      | 4.90%     |
| <b>Day 2</b>                                       | 64.44   | 64.57        | 0.126      | 0.19%     |
| <b>Day 3</b>                                       | 70.98   | 70.27        | -0.714     | -1.01%    |
| <b>Day 4</b>                                       | 74.74   | 74.35        | -0.389     | -0.52%    |
| <b>Day 5</b>                                       | 78.66   | 77.16        | -1.497     | -1.90%    |
| <b>Day 6</b>                                       | 81.99   | 80.25        | -1.733     | -2.11%    |
| <b>Day 7</b>                                       | 84.94   | 82.37        | -2.571     | -3.03%    |
| <b>aVAS<sup>2</sup></b>                            | 70.44   | 70.27        | -0.162     | -0.23%    |
| <b>Delayed Prescription- Imputed ITT Cohort</b>    |         |              |            |           |
|                                                    | Control | Intervention | Diff (I-C) | % Δ (I-C) |
| <b>Baseline</b>                                    | 0.7431  | 0.7303       | -0.0128    | -1.72%    |
| <b>Day 1</b>                                       | 0.8158  | 0.8404       | 0.0246     | 3.01%     |
| <b>Day 2</b>                                       | 0.8384  | 0.8576       | 0.0193     | 2.30%     |
| <b>Day 3</b>                                       | 0.9061  | 0.9180       | 0.0119     | 1.31%     |
| <b>Day 4</b>                                       | 0.9180  | 0.9441       | 0.0261     | 2.85%     |
| <b>Day 5</b>                                       | 0.9276  | 0.9579       | 0.0303     | 3.27%     |
| <b>Day 6</b>                                       | 0.9390  | 0.9649       | 0.0259     | 2.76%     |
| <b>Day 7</b>                                       | 0.9480  | 0.9663       | 0.0183     | 1.93%     |
| <b>QAW<sup>1</sup></b>                             | 6.2569  | 6.3943       | 0.1374     | 2.20%     |
| <b>No Delayed Prescription- Imputed ITT Cohort</b> |         |              |            |           |
|                                                    | Control | Intervention | Diff (I-C) | % Δ (I-C) |
| <b>Baseline</b>                                    | 0.7480  | 0.7892       | 0.0411     | 5.50%     |
| <b>Day 1</b>                                       | 0.8381  | 0.8535       | 0.0154     | 1.84%     |
| <b>Day 2</b>                                       | 0.8762  | 0.8793       | 0.0031     | 0.35%     |
| <b>Day 3</b>                                       | 0.9035  | 0.8993       | -0.0041    | -0.46%    |
| <b>Day 4</b>                                       | 0.9179  | 0.9225       | 0.0046     | 0.50%     |
| <b>Day 5</b>                                       | 0.9351  | 0.9273       | -0.0078    | -0.83%    |
| <b>Day 6</b>                                       | 0.9382  | 0.9396       | 0.0014     | 0.14%     |
| <b>Day 7</b>                                       | 0.9457  | 0.9382       | -0.0075    | -0.79%    |
| <b>QAW<sup>1</sup></b>                             | 6.3099  | 6.3281       | 0.0182     | 0.29%     |

1. Quality-adjusted week estimated using area under the curve estimation.

2. Average VAS score estimated average across baseline to day 7.

**Table A5: Quality of Life Analysis for Complete Cases (unadjusted)**

| <b>EQ-5D-5L Analysis</b>                     |              |              |                  |         |
|----------------------------------------------|--------------|--------------|------------------|---------|
|                                              | Control      | Intervention | Difference (I-C) | P value |
|                                              | n=172        | n=165        |                  |         |
| <b>Baseline</b>                              | 0.735        | 0.755        | 0.021            | ns      |
| <b>Day 1</b>                                 | 0.821        | 0.843        | 0.021            | ns      |
| <b>Day 2</b>                                 | 0.862        | 0.871        | 0.01             | ns      |
| <b>Day 3</b>                                 | 0.899        | 0.903        | 0.004            | ns      |
| <b>Day 4</b>                                 | 0.916        | 0.926        | 0.01             | ns      |
| <b>Day 5</b>                                 | 0.929        | 0.933        | 0.003            | ns      |
| <b>Day 6</b>                                 | 0.939        | 0.947        | 0.007            | ns      |
| <b>Day 7</b>                                 | 0.947        | 0.951        | 0.004            | ns      |
| <b>Average (Day 1-7)</b>                     | 0.902        | 0.91         | 0.008            | ns      |
| <b>Average Δ (%) from Baseline</b>           | 0.167 (22.7) | 0.155 (20.5) | -0.012           | ns      |
| <b>Average Δ (%) from Baseline at 24 hrs</b> | 0.087 (11.8) | 0.087 (11.5) | 0                | ns      |
| <b>Average Δ (%) from Baseline at 48 hrs</b> | 0.107 (14.6) | 0.101 (13.4) | -0.005           | ns      |

  

| <b>EQ-VAS Analysis</b>                       |         |              |                  |         |
|----------------------------------------------|---------|--------------|------------------|---------|
|                                              | Control | Intervention | Difference (I-C) | P value |
|                                              | n=166   | n=161        |                  |         |
| <b>Baseline</b>                              | 49      | 52           | 3                | ns      |
| <b>Day 1</b>                                 | 57      | 61           | 4                | ns      |
| <b>Day 2</b>                                 | 64      | 65           | 1                | ns      |
| <b>Day 3</b>                                 | 70      | 70           | 0                | ns      |
| <b>Day 4</b>                                 | 75      | 74           | -1               | ns      |
| <b>Day 5</b>                                 | 79      | 77           | -2               | ns      |
| <b>Day 6</b>                                 | 82      | 80           | -2               | ns      |
| <b>Day 7</b>                                 | 86      | 83           | -3               | ns      |
| <b>Average (Day 1-7)</b>                     | 73      | 73           | 0                | ns      |
| <b>Average Δ (%) from Baseline</b>           | 24 (49) | 21 (40)      | -3               | ns      |
| <b>Average Δ (%) from Baseline at 24 hrs</b> | 8 (16)  | 9 (17)       | 1                | ns      |
| <b>Average Δ (%) from Baseline at 48 hrs</b> | 15 (31) | 13 (25)      | -2               | ns      |

  

| <b>EQ-5D-5L Sub-group Analysis</b>           |                |                   |                                |         |
|----------------------------------------------|----------------|-------------------|--------------------------------|---------|
|                                              | Delayed Script | No Delayed Script | Difference (Delayed-No Script) | P value |
|                                              | n=121          | n=216             |                                |         |
| <b>Baseline</b>                              | 0.709          | 0.765             | -0.055                         | 0.005   |
| <b>Day 1</b>                                 | 0.813          | 0.842             | -0.029                         | 0.059   |
| <b>Day 2</b>                                 | 0.878          | 0.846             | -0.032                         | 0.041   |
| <b>Day 3</b>                                 | 0.903          | 0.9               | 0.003                          | ns      |
| <b>Day 4</b>                                 | 0.925          | 0.919             | 0.006                          | ns      |
| <b>Day 5</b>                                 | 0.935          | 0.929             | 0.006                          | ns      |
| <b>Day 6</b>                                 | 0.948          | 0.94              | 0.008                          | ns      |
| <b>Day 7</b>                                 | 0.959          | 0.943             | 0.016                          | ns      |
| <b>Average (Day 1-7)</b>                     | 0.904          | 0.907             | -0.003                         |         |
| <b>Average Δ (%) from Baseline</b>           | 0.195 (27.5)   | 0.143 (18.7)      | 0.052                          | 0.001   |
| <b>Average Δ (%) from Baseline at 24 hrs</b> | 0.119 (20.7)   | 0.092 (14.1)      | 0.027                          | ns      |
| <b>Average Δ (%) from Baseline at 48 hrs</b> | 0.180 (31.3)   | 0.151 (23.3)      | 0.029                          | ns      |

**Figure A1: Missingness assessment in EQ-5D-5L**

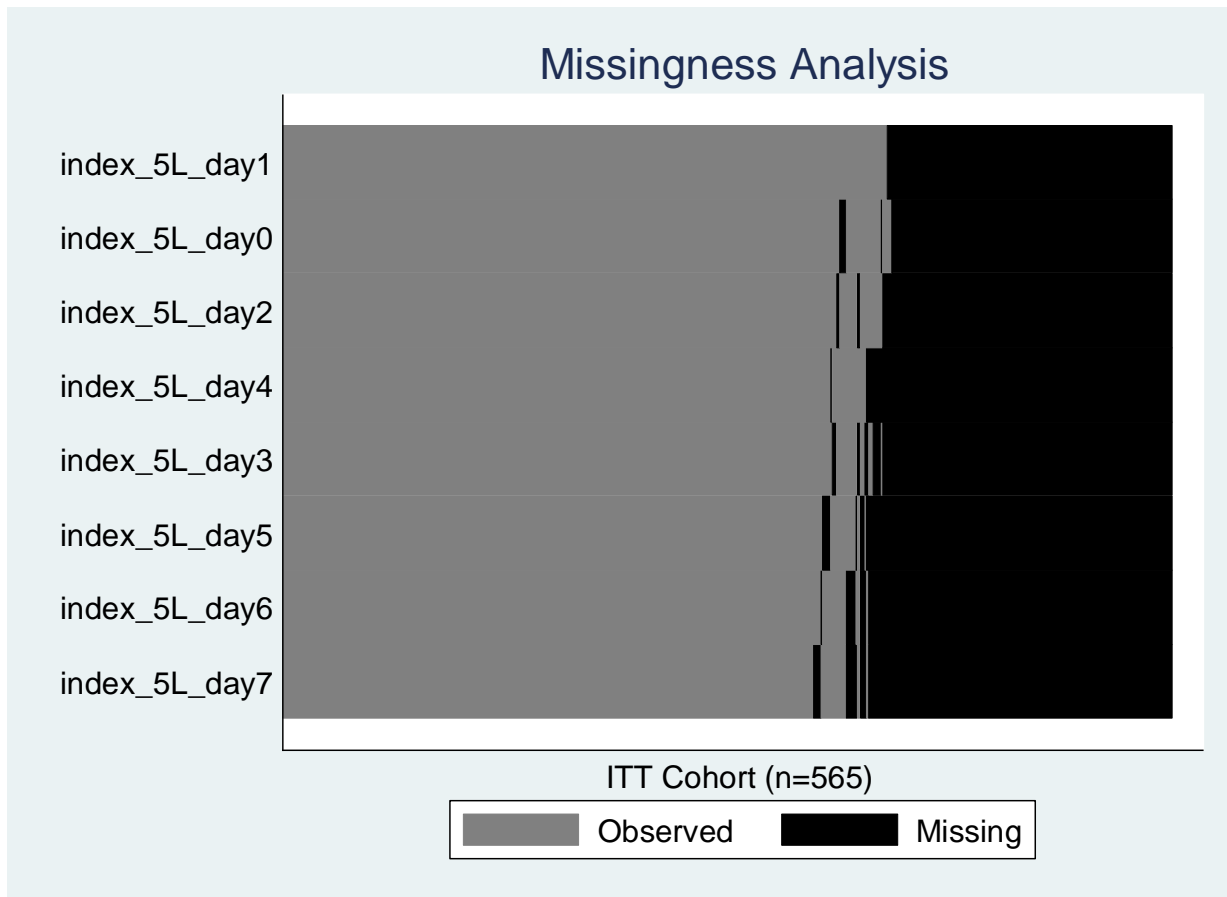

**Figure A2: QALY distribution by treatment arm**

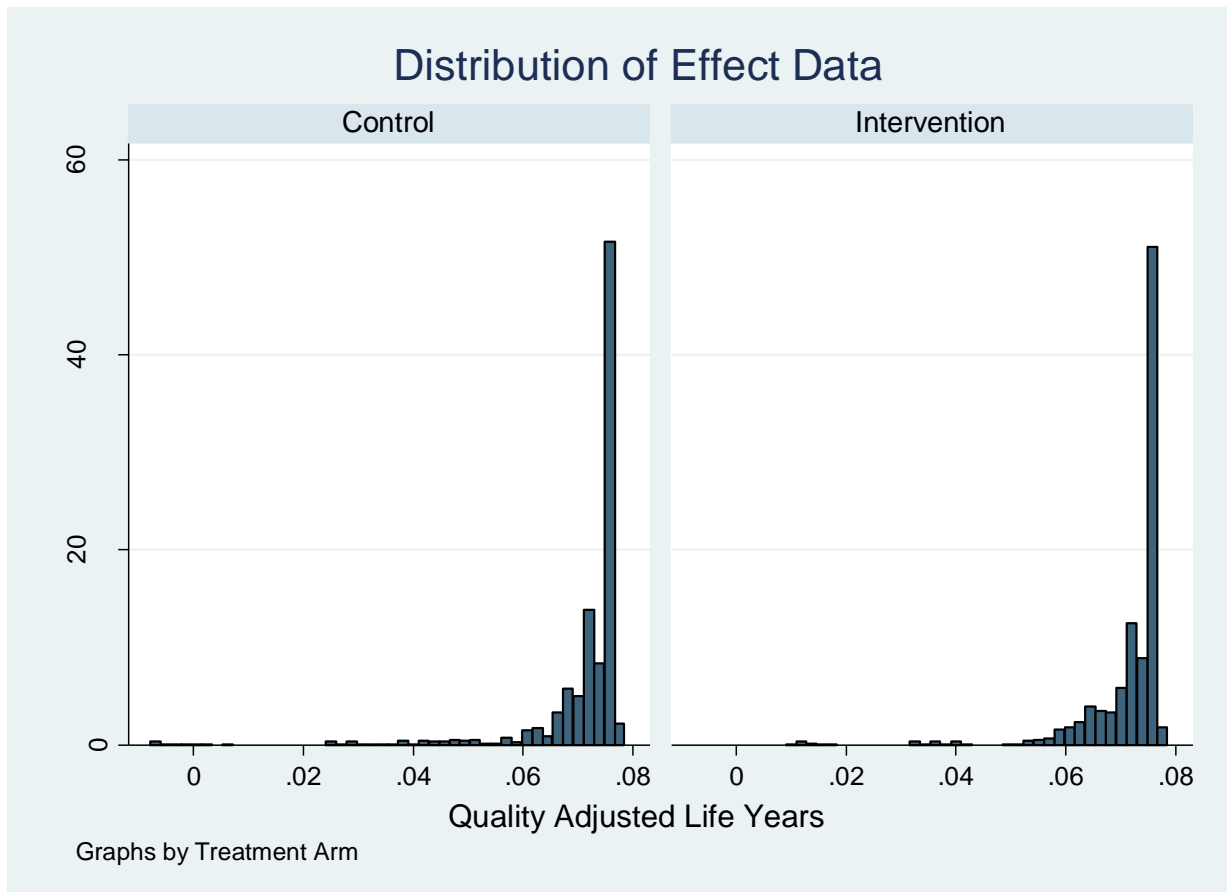

Figure A3: EQ-5D-5L Imputed Scores for ITT Cohort

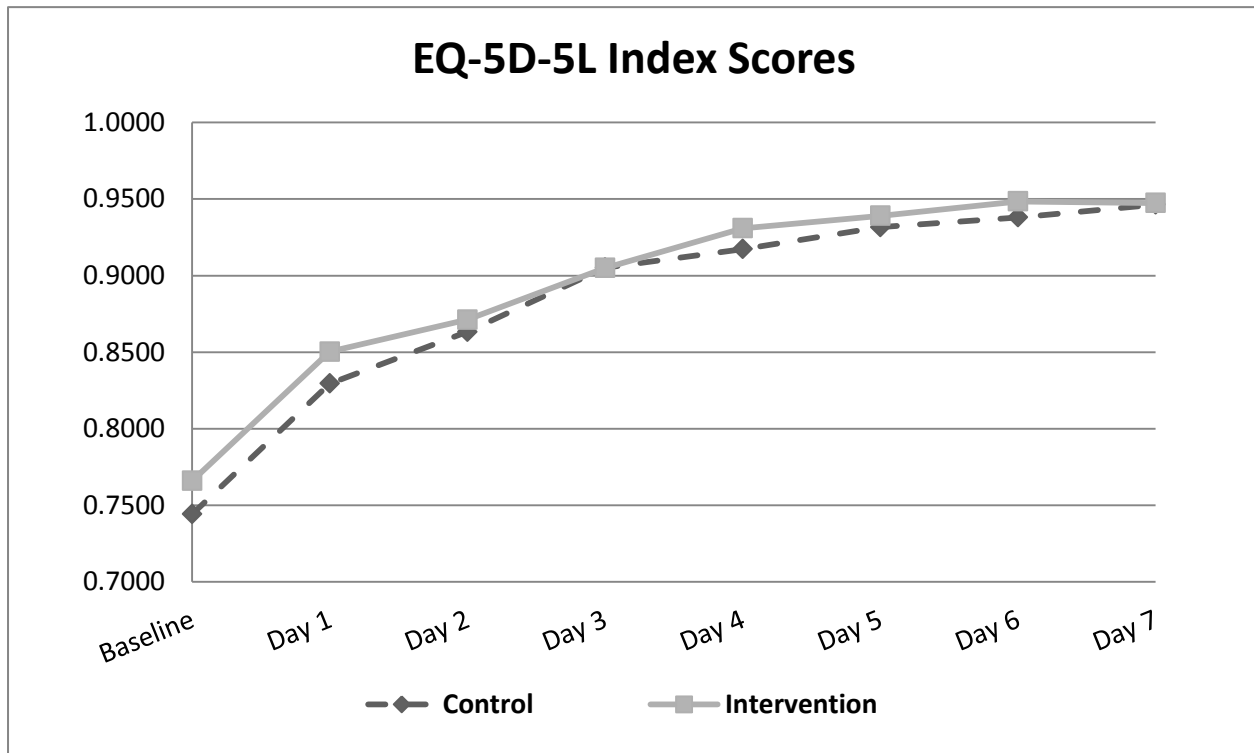

Figure A4: EQ-5D Visual Analogue Scale Imputed Scores for ITT Cohort

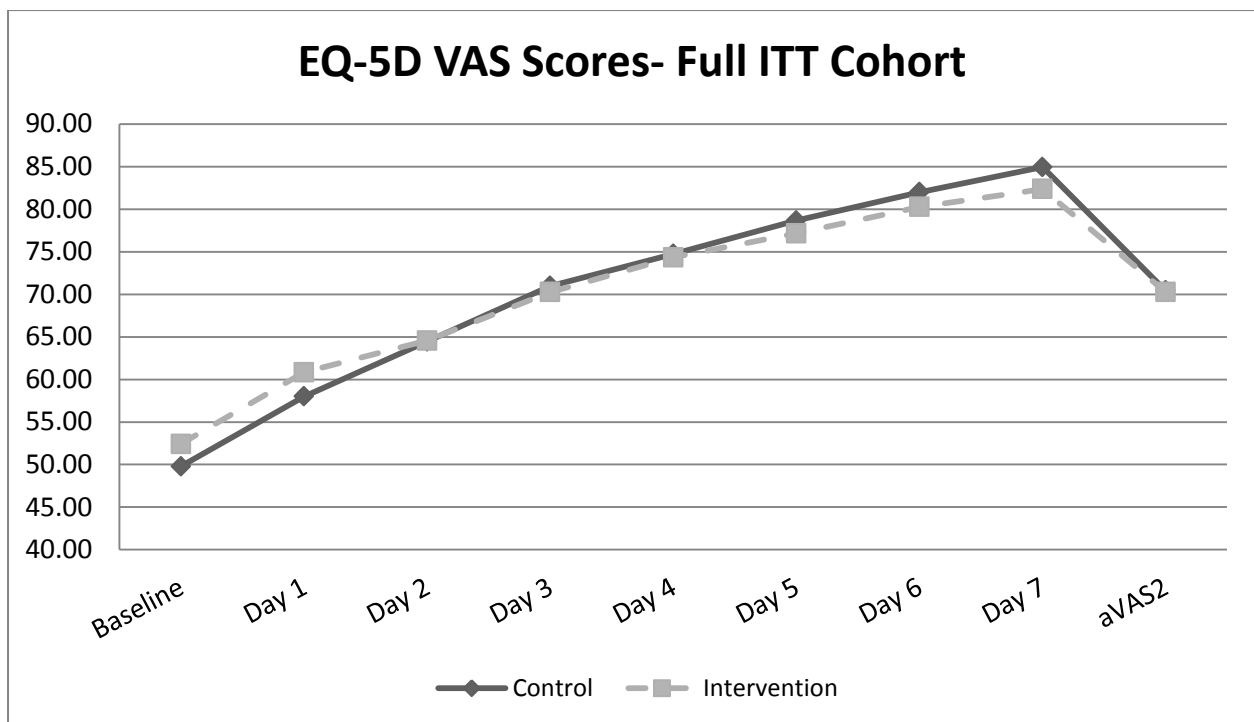

**Figure A5: Cost-effectiveness Acceptability Curve**

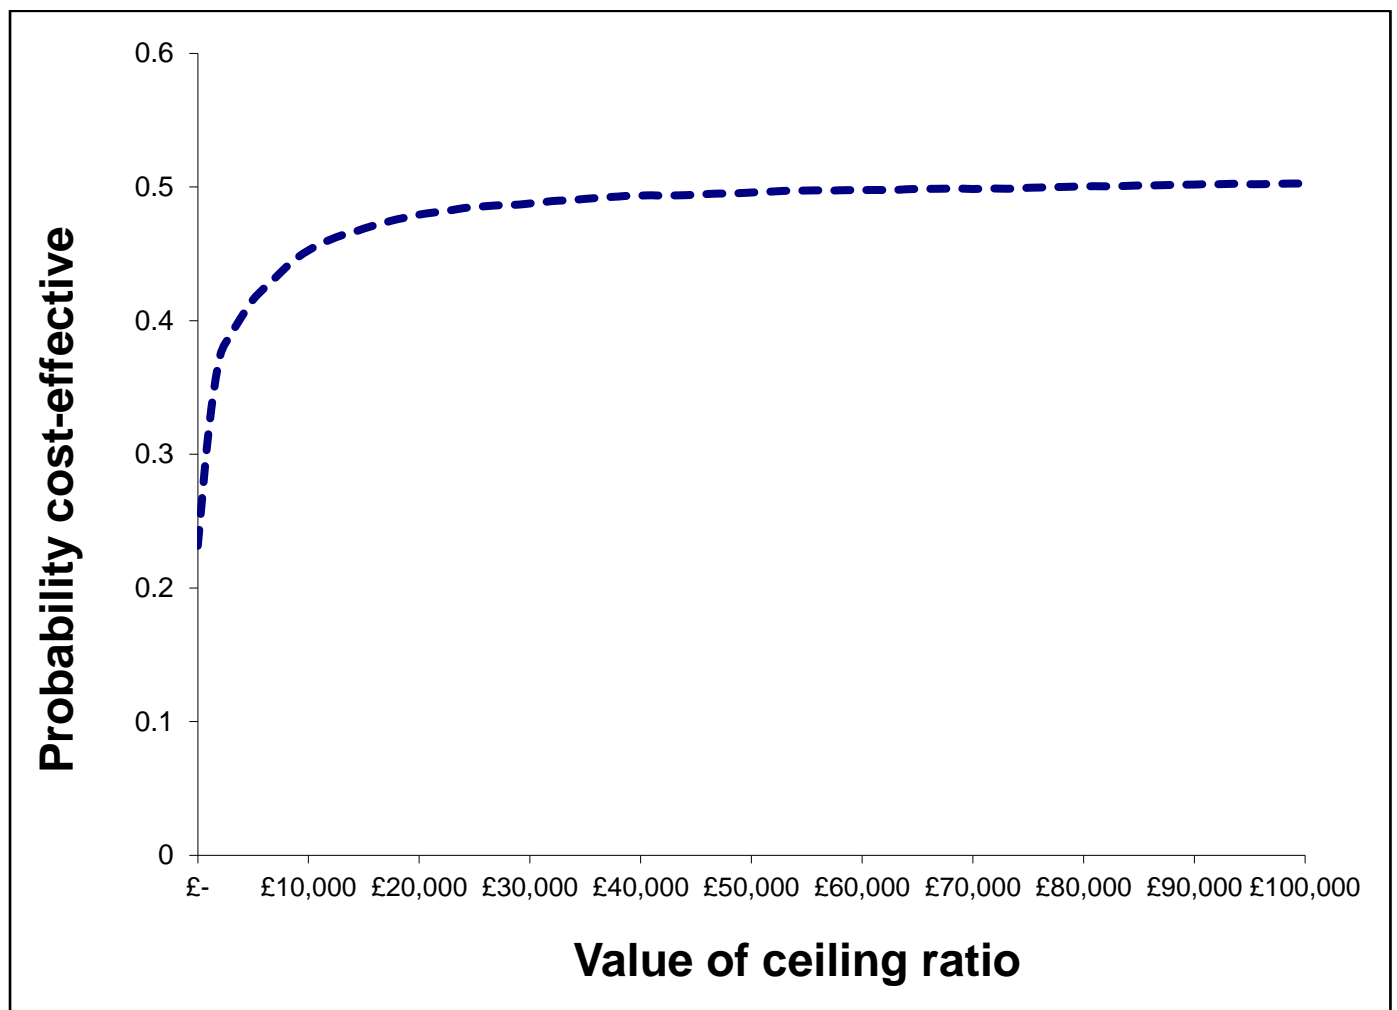

Supplement: bmjopen-2017-019184supp001.pdf [file bmjopen-2017-019184supp001.pdf]
